# Supplementary material
Source: publisher figshare collection journal article supplement (https://tandf.figshare.com/ndownloader/files/38310820)
Supplement: Supplementary file 1 [file 38310820]

**Supp. Table 5:** The whole-rock major and trace elements, ages, and Nd isotope compositions of the early Paleozoic crust-mantle and crust-derived-granitoids in the orogenic core.

| **Refere-nces** | | **Samples** | | **Rock type** | | **Age (Ma)** | | **SiO2** | | | **TiO2** | | **Al2O3** | | **Fe2O3** | | **FeO** | **MnO** | | **MgO** | | **CaO** | | **Na2O** | | **K2O** | | **P2O5** | | **LOI** | | **TOTAL** | | | **Mg#** | **Li** | | **Be** | | **Sc** | | **Ti** | | **V** | | | **Cr** | | | **Mn** | | | **Co** | | **Ni** | | **Cu** | | **Zn** | | **Ga** | **As** | |
| --- | --- | --- | --- | --- | --- | --- | --- | --- | --- | --- | --- | --- | --- | --- | --- | --- | --- | --- | --- | --- | --- | --- | --- | --- | --- | --- | --- | --- | --- | --- | --- | --- | --- | --- | --- | --- | --- | --- | --- | --- | --- | --- | --- | --- | --- | --- | --- | --- | --- | --- | --- | --- | --- | --- | --- | --- | --- | --- | --- | --- | --- | --- | --- |
| **Li et al., 2021b** | | **WZ17-1-1** | | **Granodiorite** | | **449.9** | | 62.16 | | | 0.39 | | 13.81 | | 5.01 | |  | 0.11 | | 2.21 | | 4.34 | | 2.92 | | 2.99 | | 0.09 | | 5.96 | | 99.99 | | | 46.85 | 28.5 | | 1.53 | | 14.2 | | 2181 | | 102 | | | 20.8 | | | 850 | | | 10.8 | | 7.04 | | 29.3 | | 48.7 | | 14.6 | 4.18 | |
| **WZ17-3-1** | | **454.6** | | 66.58 | | | 0.34 | | 14.09 | | 4.08 | |  | 0.08 | | 1.48 | | 2.91 | | 3.66 | | 2.15 | | 0.09 | | 4.77 | | 100.23 | | | 42.02 | 19.1 | | 1.57 | | 8.07 | | 1926 | | 67.5 | | | 14.5 | | | 613 | | | 8.24 | | 6.14 | | 121 | | 58.8 | | 14.6 | 3.91 | |
| **WZ17-4** | | **460** | | 68.53 | | | 0.33 | | 13.83 | | 4.27 | |  | 0.09 | | 1.56 | | 3.09 | | 3.03 | | 2.12 | | 0.08 | | 2.58 | | 99.50 | | | 42.19 | 25.1 | | 1.72 | | 9.03 | | 1963 | | 70.7 | | | 16.2 | | | 686 | | | 7.72 | | 6.62 | | 49.0 | | 52.5 | | 15.5 | 4.75 | |
| **WZ17-5-1** | |  | | 68.32 | | | 0.35 | | 14.39 | | 4.24 | |  | 0.09 | | 1.59 | | 3.59 | | 2.94 | | 2.85 | | 0.07 | | 1.00 | | 99.43 | | | 42.83 | 31.3 | | 1.70 | | 11.2 | | 2075 | | 75.0 | | | 19.4 | | | 670 | | | 9.10 | | 6.99 | | 5.70 | | 53.1 | | 15.1 | 2.49 | |
| **WZ17-5-2** | |  | | 67.07 | | | 0.40 | | 14.17 | | 5.09 | |  | 0.10 | | 1.89 | | 3.77 | | 2.91 | | 2.81 | | 0.10 | | 1.19 | | 99.50 | | | 42.6 | 31.4 | | 1.63 | | 15.2 | | 2370 | | 93.5 | | | 21.0 | | | 751 | | | 10.7 | | 7.50 | | 7.03 | | 60.0 | | 15.5 | 2.49 | |
| **WZ17-5-3** | |  | | 68.24 | | | 0.35 | | 14.23 | | 4.43 | |  | 0.08 | | 1.60 | | 3.64 | | 2.98 | | 2.74 | | 0.08 | | 1.00 | | 99.36 | | | 41.9 | 32.4 | | 1.70 | | 11.9 | | 2122 | | 77.8 | | | 17.7 | | | 608 | | | 9.30 | | 6.44 | | 3.04 | | 51.6 | | 15.6 | 2.62 | |
| **WZ17-5-4** | | **456** | | 68.65 | | | 0.35 | | 14.02 | | 4.43 | |  | 0.09 | | 1.65 | | 3.63 | | 2.81 | | 2.67 | | 0.07 | | 0.80 | | 99.17 | | | 42.7 | 22.0 | | 1.60 | | 12.2 | | 2036 | | 81.5 | | | 18.8 | | | 635 | | | 9.35 | | 6.56 | | 7.38 | | 52.8 | | 15.2 | 2.63 | |
| **WZ17-5-5** | | **462.3** | | 66.97 | | | 0.36 | | 14.60 | | 4.60 | |  | 0.09 | | 1.66 | | 3.74 | | 3.17 | | 2.52 | | 0.08 | | 1.80 | | 99.59 | | | 41.9 | 29.8 | | 1.65 | | 11.0 | | 2138 | | 84.8 | | | 21.2 | | | 663 | | | 9.20 | | 6.75 | | 8.97 | | 57.7 | | 14.7 | 2.57 | |
| **WZ17-8** | |  | | 61.81 | | | 0.42 | | 14.25 | | 5.20 | |  | 0.08 | | 2.20 | | 2.96 | | 2.52 | | 2.73 | | 0.08 | | 7.52 | | 99.77 | | | 45.8 | 15.7 | | 1.43 | | 15.7 | | 2527 | | 110 | | | 30.3 | | | 681 | | | 11.4 | | 11.1 | | 30.0 | | 110 | | 15.6 | 19.4 | |
| **WZ17-6-1** | |  | | 65.48 | | | 0.42 | | 14.67 | | 5.57 | |  | 0.11 | | 2.28 | | 4.54 | | 2.77 | | 2.31 | | 0.10 | | 0.80 | | 99.05 | | | 45.0 | 24.0 | | 1.36 | | 15.4 | | 2562 | | 116 | | | 23.4 | | | 758 | | | 12.3 | | 7.83 | | 6.93 | | 59.0 | | 15.0 | 2.18 | |
| **WZ17-6-2** | | **462.4** | | 64.80 | | | 0.42 | | 14.96 | | 5.56 | |  | 0.11 | | 2.35 | | 4.47 | | 2.88 | | 2.11 | | 0.09 | | 2.00 | | 99.75 | | | 45.8 | 26.9 | | 1.37 | | 14.5 | | 2469 | | 111 | | | 25.7 | | | 798 | | | 12.2 | | 8.22 | | 5.85 | | 56.8 | | 14.5 | 6.89 | |
| **WZ17-6-3** | | **458.9** | | 66.59 | | | 0.41 | | 14.65 | | 5.20 | |  | 0.09 | | 2.03 | | 4.53 | | 3.13 | | 1.64 | | 0.09 | | 2.00 | | 100.35 | | | 43.8 | 21.2 | | 1.52 | | 12.43 | | 2370 | | 107 | | | 15.5 | | | 693 | | | 10.9 | | 5.48 | | 3.12 | | 51.3 | | 14.2 | 2.30 | |
| **WZ17-7-3** | | **444.7** | | 67.75 | | | 0.33 | | 14.50 | | 3.84 | |  | 0.08 | | 1.64 | | 2.85 | | 3.11 | | 3.46 | | 0.07 | | 1.79 | | 99.41 | | | 46.0 | 28.9 | | 1.66 | | 10.8 | | 1942 | | 71.3 | | | 21.8 | | | 623 | | | 8.55 | | 7.48 | | 3.92 | | 53.3 | | 14.6 | 3.82 | |
| **WZ17-7-4** | |  | | 67.80 | | | 0.35 | | 13.92 | | 4.26 | |  | 0.08 | | 1.63 | | 2.80 | | 3.23 | | 2.72 | | 0.08 | | 2.40 | | 99.26 | | | 43.3 | 43.4 | | 2.29 | | 10.8 | | 2059 | | 72.4 | | | 23.7 | | | 560 | | | 11.9 | | 7.69 | | 49.2 | | 55.5 | | 14.2 | 11.7 | |
| **WZ17-10** | | **460** | | 65.86 | | | 0.41 | | 14.36 | | 4.60 | |  | 0.08 | | 1.72 | | 2.28 | | 3.02 | | 3.21 | | 0.09 | | 3.40 | | 99.03 | | | 42.8 | 23.0 | | 1.89 | | 12.7 | | 2406 | | 84.9 | | | 20.3 | | | 636 | | | 9.96 | | 8.67 | | 9.97 | | 55.8 | | 17.4 | 3.48 | |
| **WZ17-11-2** | | **446.2** | | 67.51 | | | 0.31 | | 14.91 | | 4.17 | |  | 0.08 | | 1.55 | | 3.46 | | 2.61 | | 2.47 | | 0.09 | | 2.20 | | 99.36 | | | 42.6 | 24.4 | | 2.20 | | 11.6 | | 1869 | | 81.1 | | | 11.2 | | | 593 | | | 7.47 | | 5.29 | | 57.6 | | 49.9 | | 14.8 | 3.05 | |
| **WZ17-2** | | **Monzogranite** | | **455.6** | | 72.06 | | | 0.17 | | 13.19 | | 2.46 | |  | 0.05 | | 0.74 | | 1.04 | | 3.24 | | 4.19 | | 0.07 | | 2.59 | | 99.79 | | | 37.5 | 13.5 | | 2.09 | | 6.62 | | 895 | | 23.2 | | | 6.17 | | | 361 | | | 3.00 | | 2.53 | | 0.92 | | 29.0 | | 14.7 | 4.41 | |
| **WZ17-7-1** | | **453.3** | | 72.10 | | | 0.15 | | 13.47 | | 2.55 | |  | 0.05 | | 0.69 | | 0.88 | | 3.56 | | 4.20 | | 0.06 | | 2.00 | | 99.70 | | | 35.1 | 32.5 | | 2.54 | | 8.24 | | 889 | | 22.0 | | | 4.74 | | | 379 | | | 2.38 | | 1.85 | | 0.31 | | 34.9 | | 14.7 | 3.68 | |
| **WZ17-7-2** | | **442** | | 74.02 | | | 0.11 | | 13.28 | | 1.68 | |  | 0.04 | | 0.45 | | 1.34 | | 3.48 | | 3.97 | | 0.04 | | 0.99 | | 99.40 | | | 34.9 | 23.5 | | 2.72 | | 4.75 | | 595 | | 14.4 | | | 4.39 | | | 338 | | | 1.91 | | 1.54 | | 2.83 | | 26.2 | | 13.1 | 3.44 | |
| **WZ17-7-6** | | **460.4** | | 72.83 | | | 0.12 | | 13.46 | | 2.09 | |  | 0.05 | | 0.45 | | 1.32 | | 3.40 | | 4.12 | | 0.07 | | 1.20 | | 99.10 | | | 30.1 | 31.0 | | 3.16 | | 6.73 | | 678 | | 15.6 | | | 2.74 | | | 357 | | | 1.88 | | 1.29 | | 4.50 | | 26.2 | | 15.5 | 3.38 | |
| **WZ17-1-3** | | **Mafic microgranular enclaves (MMEs)** | |  | | 57.96 | | | 0.49 | | 16.49 | | 7.51 | |  | 0.16 | | 3.91 | | 4.06 | | 2.25 | | 2.92 | | 0.09 | | 4.38 | | 100.21 | | | 51.0 | 30.3 | | 1.37 | | 21.6 | | 2936 | | 166 | | | 72.1 | | | 1247 | | | 20.0 | | 23.7 | | 3.96 | | 87.6 | | 16.9 | 4.51 | |
| **WZ17-6-4** | | **447.3** | | 56.62 | | | 0.62 | | 16.39 | | 8.70 | |  | 0.19 | | 3.51 | | 6.28 | | 3.22 | | 1.93 | | 0.08 | | 2.00 | | 99.53 | | | 44.6 | 22.7 | | 1.63 | | 26.2 | | 3789 | | 224 | | | 20.7 | | | 1390 | | | 21.2 | | 11.5 | | 63.7 | | 86.9 | | 16.8 | 2.82 | |
| **WZ17-6-5** | | **464.2** | | 54.35 | | | 0.58 | | 15.67 | | 8.90 | |  | 0.26 | | 4.53 | | 7.15 | | 3.27 | | 1.50 | | 0.10 | | 3.17 | | 99.48 | | | 50.4 | 27.1 | | 1.60 | | 31.0 | | 3544 | | 247 | | | 51.5 | | | 1928 | | | 21.8 | | 7.18 | | 42.7 | | 95.2 | | 16.6 | 2.89 | |
| **WZ17-6-6** | |  | | 56.55 | | | 0.75 | | 15.18 | | 9.91 | |  | 0.20 | | 3.96 | | 5.70 | | 2.65 | | 2.04 | | 0.16 | | 2.40 | | 99.51 | | | 44.4 | 29.0 | | 1.34 | | 32.5 | | 4595 | | 216 | | | 39.7 | | | 1456 | | | 21.1 | | 11.9 | | 27.8 | | 101 | | 18.5 | 4.25 | |
| **WZ17-6-7** | |  | | 52.45 | | | 0.75 | | 16.48 | | 10.89 | |  | 0.23 | | 4.71 | | 7.49 | | 3.05 | | 1.81 | | 0.10 | | 1.20 | | 99.16 | | | 46.4 | 24.0 | | 1.42 | | 38.0 | | 4534 | | 310 | | | 32.1 | | | 1686 | | | 28.0 | | 18.1 | | 55.6 | | 105 | | 18.6 | 3.20 | |
| **WZ17-6-8** | |  | | 53.32 | | | 0.72 | | 16.81 | | 10.09 | |  | 0.20 | | 4.22 | | 7.06 | | 3.09 | | 1.94 | | 0.10 | | 1.60 | | 99.13 | | | 45.5 | 24.0 | | 1.41 | | 32.8 | | 4380 | | 281 | | | 25.5 | | | 1502 | | | 26.1 | | 15.3 | | 65.7 | | 97.2 | | 17.7 | 3.66 | |
| **Xie et al., 2020** | | **14Y005-7H** | | **Granite** | | **450-445** | | 63.62 | | | 0.45 | | 13.34 | | 2 | | 4.04 | 0.11 | | 3.44 | | 4.81 | | 2.15 | | 4.16 | | 0.17 | | 0.97 | | 99.26 | | |  |  | |  | |  | |  | |  | | |  | | |  | | |  | |  | |  | |  | | 13.4 |  | |
| **14Y005-11H** | | 67.34 | | | 0.34 | | 13.28 | | 1.12 | | 4.16 | 0.09 | | 2.61 | | 3.81 | | 1.96 | | 4.33 | | 0.13 | | 0.32 | | 99.49 | | |  |  | |  | |  | |  | |  | | |  | | |  | | |  | |  | |  | |  | | 12.5 |  | |
| **14Y005-13H** | | 63.51 | | | 0.47 | | 13.68 | | 1.37 | | 4.5 | 0.11 | | 3.6 | | 4.87 | | 2.14 | | 3.96 | | 0.18 | | 0.92 | | 99.31 | | |  |  | |  | |  | |  | |  | | |  | | |  | | |  | |  | |  | |  | | 13.1 |  | |
| **14Y006-1H** | | 59.1 | | | 0.62 | | 14.23 | | 2.6 | | 5.22 | 0.14 | | 4.89 | | 4.75 | | 1.83 | | 3.68 | | 0.27 | | 1.88 | | 99.21 | | |  |  | |  | |  | |  | |  | | |  | | |  | | |  | |  | |  | |  | | 14.7 |  | |
| **14Y006-2H** | | 59.94 | | | 0.62 | | 13.9 | | 2.26 | | 5.28 | 0.13 | | 4.86 | | 5.24 | | 1.66 | | 3.48 | | 0.25 | | 1.58 | | 99.19 | | |  |  | |  | |  | |  | |  | | |  | | |  | | |  | |  | |  | |  | | 14.6 |  | |
| **GD010-1** | | 63.56 | | | 0.48 | | 13.92 | | 1.49 | | 3.63 | 0.09 | | 3.73 | | 5.09 | | 2.15 | | 3.83 | | 0.18 | | 1.08 | | 99.23 | | |  |  | |  | |  | |  | |  | | |  | | |  | | |  | |  | |  | |  | | 14.6 |  | |
| **GD010-3** | | 62.52 | | | 0.51 | | 13.99 | | 1.62 | | 3.98 | 0.1 | | 4.08 | | 5.42 | | 2.1 | | 3.69 | | 0.2 | | 1.24 | | 99.45 | | |  |  | |  | |  | |  | |  | | |  | | |  | | |  | |  | |  | |  | | 14.9 |  | |
| **GD010-5** | | 64.37 | | | 0.48 | | 13.8 | | 1.26 | | 3.8 | 0.09 | | 3.73 | | 4.54 | | 2.11 | | 4.15 | | 0.18 | | 0.89 | | 99.4 | | |  |  | |  | |  | |  | |  | | |  | | |  | | |  | |  | |  | |  | | 14.9 |  | |
| **14Y005-1H** | | **MMEs** | | **446-437** | | 56.28 | | | 0.63 | | 13.16 | | 2.75 | | 6.63 | 0.19 | | 6.28 | | 7.57 | | 1.61 | | 2.6 | | 0.25 | | 1.12 | | 99.06 | | |  |  | |  | |  | |  | |  | | |  | | |  | | |  | |  | |  | |  | | 14.5 |  | |
| **14Y005-2H** | | 57.48 | | | 0.58 | | 13.43 | | 2.64 | | 6.06 | 0.16 | | 5.53 | | 7.41 | | 1.63 | | 2.05 | | 0.22 | | 1.95 | | 99.14 | | |  |  | |  | |  | |  | |  | | |  | | |  | | |  | |  | |  | |  | | 15.5 |  | |
| **14Y005-4H** | | 58.12 | | | 0.56 | | 12.75 | | 2.13 | | 6.54 | 0.17 | | 5.83 | | 6.95 | | 1.59 | | 3.18 | | 0.22 | | 1.03 | | 99.07 | | |  |  | |  | |  | |  | |  | | |  | | |  | | |  | |  | |  | |  | | 13.4 |  | |
| **14Y005-8H** | | 59.62 | | | 0.69 | | 13.94 | | 0.21 | | 7.44 | 0.13 | | 4.85 | | 6.14 | | 1.81 | | 1.93 | | 0.23 | | 2.02 | | 99.01 | | |  |  | |  | |  | |  | |  | | |  | | |  | | |  | |  | |  | |  | | 15.1 |  | |
| **14Y005-10H** | | 57.52 | | | 0.54 | | 13.54 | | 1.52 | | 5.82 | 0.13 | | 7.24 | | 6.78 | | 2.06 | | 3.08 | | 0.16 | | 0.81 | | 99.21 | | |  |  | |  | |  | |  | |  | | |  | | |  | | |  | |  | |  | |  | | 13.4 |  | |
| **GD010-2** | | 60.17 | | | 0.56 | | 13.14 | | 2.12 | | 4.67 | 0.13 | | 5.37 | | 6.32 | | 1.91 | | 3.18 | | 0.22 | | 1.39 | | 99.18 | | |  |  | |  | |  | |  | |  | | |  | | |  | | |  | |  | |  | |  | | 13.8 |  | |
| **GD010-4** | | 56.41 | | | 0.67 | | 14.25 | | 2.51 | | 5.58 | 0.15 | | 6.19 | | 7.35 | | 2.35 | | 2.21 | | 0.27 | | 1.28 | | 99.22 | | |  |  | |  | |  | |  | |  | | |  | | |  | | |  | |  | |  | |  | | 16.7 |  | |
| **GD010-6** | | 57.25 | | | 0.86 | | 16.52 | | 1.8 | | 6.53 | 0.13 | | 3.91 | | 6.93 | | 1.7 | | 1.87 | | 0.14 | | 1.64 | | 99.28 | | |  |  | |  | |  | |  | |  | | |  | | |  | | |  | |  | |  | |  | | 19.1 |  | |
| **Xia et al., 2014** | | **XW01** | | **Xiawan monzogranite** | | **413** | | 73.19 | | | 0.28 | | 13.43 | |  | |  | 0.03 | | 0.39 | | 0.61 | | 3.3 | | 4.82 | | 0.09 | | 1.52 | | 99.69 | | |  | 10.3 | | 1.01 | | 3.16 | |  | | 19.2 | | | 4.7 | | |  | | | 2.57 | | 2.82 | | 13.77 | | 26.9 | | 14.3 |  | |
| **XW04** | |  | | 72.97 | | | 0.3 | | 13.47 | |  | |  | 0.02 | | 0.41 | | 0.19 | | 3.31 | | 5.27 | | 0.05 | | 1.47 | | 99.69 | | |  | 10.3 | | 1.08 | | 3.45 | |  | | 20.6 | | | 8.47 | | |  | | | 1.61 | | 3.05 | | 5.98 | | 45.7 | | 13.8 |  | |
| **XW06** | |  | | 72.44 | | | 0.32 | | 13.17 | |  | |  | 0.03 | | 0.54 | | 0.82 | | 3.16 | | 5.3 | | 0.11 | | 1.45 | | 99.66 | | |  |  | |  | |  | |  | |  | | |  | | |  | | |  | |  | |  | |  | |  |  | |
| **XW07** | |  | | 72.25 | | | 0.31 | | 13.58 | |  | |  | 0.04 | | 0.77 | | 0.97 | | 3.89 | | 4.02 | | 0.11 | | 1.68 | | 99.77 | | |  | 25.6 | | 1.06 | | 3.77 | |  | | 24.5 | | | 6.6 | | |  | | | 2.82 | | 3.67 | | 4.62 | | 45.7 | | 13.6 |  | |
| **DT01** | | **Duntou granodiorite** | | **409** | | 67.59 | | | 0.54 | | 15.69 | |  | |  | 0.05 | | 1.52 | | 1.09 | | 5.24 | | 2.01 | | 0.23 | | 2.63 | | 100.11 | | |  | 23.5 | | 1.6 | | 3.4 | |  | | 58.1 | | | 14.1 | | |  | | | 8.12 | | 8.23 | | 8.52 | | 107 | | 16.7 |  | |
| **DT02** | | **411** | | 68.89 | | | 0.49 | | 16.23 | |  | |  | 0.04 | | 1.15 | | 0.45 | | 4.79 | | 2.08 | | 0.22 | | 2.6 | | 100.15 | | |  | 11.2 | | 2.5 | | 3.53 | |  | | 12.4 | | | 2.13 | | |  | | | 1.46 | | 1.02 | | 2.87 | | 47.6 | | 16.6 |  | |
| **DT03** | |  | | 74.36 | | | 0.16 | | 13.54 | |  | |  | 0.03 | | 0.24 | | 0.16 | | 3.57 | | 5.28 | | 0.04 | | 1.17 | | 99.82 | | |  |  | |  | |  | |  | |  | | |  | | |  | | |  | |  | |  | |  | |  |  | |
| **DT04** | | **436** | | 73.51 | | | 0.21 | | 13.85 | |  | |  | 0.03 | | 0.54 | | 1 | | 3.46 | | 3.65 | | 0.08 | | 1.4 | | 99.68 | | |  | 20 | | 1.29 | | 2.64 | |  | | 18.1 | | | 6.5 | | |  | | | 2.69 | | 2.95 | | 3.16 | | 34.9 | | 13.3 |  | |
| **DT06** | |  | | 74.87 | | | 0.08 | | 12.59 | |  | |  | 0.04 | | 0.13 | | 1.62 | | 3.56 | | 3.99 | | 0.03 | | 2.33 | | 99.84 | | |  |  | |  | |  | |  | |  | | |  | | |  | | |  | |  | |  | |  | |  |  | |
| **DT07** | |  | | 72.95 | | | 0.22 | | 13.94 | |  | |  | 0.04 | | 0.4 | | 1.03 | | 3.5 | | 3.55 | | 0.07 | | 2.14 | | 99.71 | | |  | 164.5 | | 1.44 | | 2.77 | |  | | 16 | | | 2.75 | | |  | | | 2.3 | | 1.62 | | 2.09 | | 37.2 | | 14.9 |  | |
| **DT09** | | **411** | | 74.63 | | | 0.21 | | 13.26 | |  | |  | 0.05 | | 0.72 | | 1.34 | | 4.59 | | 1.51 | | 0.04 | | 1.64 | | 99.8 | | |  | 10.2 | | 1.25 | | 2.23 | |  | | 21.7 | | | 6 | | |  | | | 2.87 | | 3.21 | | 3.34 | | 46.2 | | 12.2 |  | |
| **Zhang et al., 2015** | | **GY-1** | | **Guiyang granite** | |  | | 72.56 | | | 0.36 | | 13.59 | | 2.29 | |  | 0.05 | | 0.52 | | 0.48 | | 3.53 | | 4.65 | | 0.12 | | 1.04 | | 99.2 | | | 0.31 |  | |  | | 5.2 | |  | | 26 | | | 18 | | |  | | | 3.9 | | 4.5 | |  | |  | | 18 |  | |
| **GY-2** | |  | | 70.42 | | | 0.32 | | 14.58 | | 2.15 | |  | 0.04 | | 0.43 | | 1.4 | | 3.57 | | 5.34 | | 0.1 | | 0.69 | | 99.04 | | | 0.29 |  | |  | | 5.1 | |  | | 31 | | | 19 | | |  | | | 4.8 | | 6.4 | |  | |  | | 20 |  | |
| **GY-4** | |  | | 71.11 | | | 0.55 | | 13.48 | | 2.25 | |  | 0.07 | | 0.73 | | 0.99 | | 2.87 | | 5.74 | | 0.17 | | 0.91 | | 98.87 | | | 0.39 |  | |  | | 6.8 | |  | | 38 | | | 23 | | |  | | | 5.2 | | 6.3 | |  | |  | | 14 |  | |
| **GY-5** | | **431** | | 68.23 | | | 0.53 | | 14.84 | | 3.4 | |  | 0.06 | | 0.88 | | 2.13 | | 3.48 | | 4.64 | | 0.16 | | 0.84 | | 99.2 | | | 0.34 |  | |  | | 10.4 | |  | | 43 | | | 17 | | |  | | | 6.7 | | 6.4 | |  | |  | | 20 |  | |
| **Xu and Xu, 2015** | | **RC01** | | **Quartz diorite** | | **442** | | 59.9 | | | 0.77 | | 14.67 | |  | |  | 0.13 | | 5.17 | | 5.3 | | 2.65 | | 2.5 | | 0.25 | | 2.48 | | 100.88 | | |  | 29.44 | | 1.8 | | 22.64 | | 4565 | | 114.33 | | | 197.37 | | | 1215 | | | 46.08 | | 59.39 | | 70.1 | | 83.28 | | 17.75 |  | |
| **RC03** | |  | | 65.25 | | | 0.53 | | 14.89 | |  | |  | 0.07 | | 2.86 | | 3.47 | | 3.76 | | 2.53 | | 0.21 | | 2.23 | | 100.02 | | |  | 23.35 | | 2.48 | | 11.6 | | 3036 | | 56.63 | | | 113.16 | | | 654 | | | 24.77 | | 43.01 | | 22.19 | | 59.78 | | 17.92 |  | |
| **RC05** | | **Amphible bearing biotite granite** | |  | | 66.23 | | | 0.81 | | 14.66 | |  | |  | 0.09 | | 1.8 | | 3.31 | | 3.14 | | 3.69 | | 0.26 | | 1.1 | | 100.44 | | |  | 82.33 | | 3.33 | | 13.75 | | 4913 | | 61.82 | | | 53.72 | | | 863 | | | 30.48 | | 17.67 | | 14.44 | | 80.16 | | 19.77 |  | |
| **RC06** | | **441** | | 66.53 | | | 0.72 | | 15.58 | |  | |  | 0.07 | | 1.56 | | 3.28 | | 3.4 | | 4.17 | | 0.24 | | 0.47 | | 100.66 | | |  | 65.66 | | 3.36 | | 11.59 | | 4254 | | 51.77 | | | 43.9 | | | 729 | | | 18.97 | | 14.07 | | 13.7 | | 70.87 | | 19.22 |  | |
| **RC07** | |  | | 66.6 | | | 0.72 | | 14.8 | |  | |  | 0.08 | | 1.61 | | 3.29 | | 3.19 | | 3.53 | | 0.23 | | 0.72 | | 99.52 | | |  | 90.19 | | 3.5 | | 12.93 | | 4344 | | 53.49 | | | 43.28 | | | 779 | | | 19.86 | | 13.82 | | 14.02 | | 71.99 | | 19.11 |  | |
| **RC08** | | **443** | | 65.53 | | | 0.76 | | 14.91 | |  | |  | 0.09 | | 1.64 | | 3.28 | | 3.21 | | 3.73 | | 0.26 | | 1.12 | | 99.47 | | |  | 71.82 | | 3.19 | | 13.07 | | 4576 | | 55.74 | | | 46.14 | | | 793 | | | 22.45 | | 14.55 | | 16.84 | | 74.52 | | 19.41 |  | |
| **RC11** | | **Amphible bearing biotite granite** | |  | | 60.25 | | | 0.81 | | 14.49 | |  | |  | 0.12 | | 3.78 | | 5.52 | | 2.58 | | 3.93 | | 0.37 | | 0.79 | | 99.11 | | |  | 69.87 | | 3.3 | | 18.52 | | 5015 | | 103.64 | | | 171.34 | | | 1257 | | | 39.85 | | 48.78 | | 52.56 | | 81.32 | | 17.53 |  | |
| **RC13** | | **439** | | 59.18 | | | 0.83 | | 14.52 | |  | |  | 0.12 | | 4.21 | | 5.66 | | 2.77 | | 3.8 | | 0.39 | | 1.01 | | 99.02 | | |  | 47.54 | | 3.11 | | 18.72 | | 5142 | | 102.41 | | | 205.35 | | | 1193 | | | 40.21 | | 59.24 | | 48.25 | | 77.95 | | 17.47 |  | |
| **RC13-2** | | **MME** | | **441** | | 54.85 | | | 0.92 | | 13.48 | |  | |  | 0.14 | | 6.86 | | 7.35 | | 2.57 | | 3.57 | | 0.46 | | 1.22 | | 99.31 | | |  | 21.69 | | 1.49 | | 12.64 | | 2936 | | 58.72 | | | 216.49 | | | 760 | | | 28.44 | | 61.62 | | 75.57 | | 43.46 | | 8.35 |  | |
| **RC15** | | **Amphible bearing biotite granite** | | **442** | | 62.44 | | | 0.67 | | 14.43 | |  | |  | 0.09 | | 3.29 | | 4.77 | | 2.87 | | 4.21 | | 0.34 | | 1.01 | | 99.41 | | |  | 42.21 | | 3.45 | | 14.57 | | 4263 | | 77.74 | | | 174.08 | | | 1020 | | | 31.92 | | 51.34 | | 15.62 | | 61.64 | | 16.78 |  | |
| **RC16** | |  | | 59.9 | | | 0.8 | | 14.47 | |  | |  | 0.12 | | 3.96 | | 5.21 | | 2.82 | | 4.03 | | 0.39 | | 1.63 | | 99.8 | | |  | 39.49 | | 3.44 | | 17.79 | | 4908 | | 96.44 | | | 153.93 | | | 1281 | | | 43.02 | | 46.62 | | 55.01 | | 78.79 | | 17 |  | |
| **GD11** | | **Amphible bearing biotite granite** | | **442** | | 63.09 | | | 0.84 | | 15.54 | |  | |  | 0.09 | | 2.33 | | 4.23 | | 3.21 | | 3.16 | | 0.29 | | 0.69 | | 99.22 | | |  | 69.1 | | 2.95 | | 15.27 | | 5101 | | 76.32 | | | 93.86 | | | 991 | | | 26.84 | | 23.62 | | 19.02 | | 80.94 | | 20.03 |  | |
| **GD12** | |  | | 64.55 | | | 0.79 | | 15.32 | |  | |  | 0.09 | | 1.78 | | 3.67 | | 3.31 | | 3.52 | | 0.27 | | 0.87 | | 99.27 | | |  | 62.07 | | 3.3 | | 12.63 | | 4539 | | 59.27 | | | 43.99 | | | 855 | | | 20.19 | | 13.04 | | 15.39 | | 75.64 | | 19.62 |  | |
| **GD23** | | **438** | | 62.56 | | | 0.78 | | 15.4 | |  | |  | 0.09 | | 2.1 | | 4.02 | | 3.04 | | 3.56 | | 0.24 | | 2.26 | | 99.27 | | |  | 60.58 | | 2.64 | | 12.19 | | 4590 | | 68.63 | | | 64.02 | | | 918 | | | 23.3 | | 16.05 | | 17.14 | | 74.04 | | 19.11 |  | |
| **GD24** | | **437** | | 63.34 | | | 0.77 | | 15.88 | |  | |  | 0.08 | | 2.25 | | 4.1 | | 2.98 | | 3.13 | | 0.28 | | 1.12 | | 99.42 | | |  | 54.3 | | 2.59 | | 13.75 | | 4590 | | 68.88 | | | 69.87 | | | 949 | | | 23.81 | | 18.4 | | 17.64 | | 80.61 | | 19.48 |  | |
| **RC17** | | **Biotite granite** | |  | | 68.8 | | | 0.6 | | 14.24 | |  | |  | 0.06 | | 1.44 | | 2.72 | | 2.84 | | 3.92 | | 0.24 | | 0.74 | | 99.46 | | |  | 127.58 | | 3.69 | | 10.81 | | 3954 | | 41.22 | | | 45.14 | | | 919 | | | 12.3 | | 15.66 | | 9 | | 98.17 | | 19.09 |  | |
| **RC18** | |  | | 71.3 | | | 0.34 | | 13.37 | |  | |  | 0.05 | | 0.61 | | 1.52 | | 3.18 | | 4.24 | | 0.09 | | 3.4 | | 100.07 | | |  | 97.65 | | 5.05 | | 6.58 | | 1763 | | 25.11 | | | 24.53 | | | 676 | | | 4.66 | | 10.32 | | 6.35 | | 42.96 | | 18.64 |  | |
| **RC19** | | **438** | | 67.72 | | | 0.63 | | 13.65 | |  | |  | 0.07 | | 1.54 | | 2.07 | | 3.4 | | 3.82 | | 0.23 | | 1.48 | | 99.02 | | |  | 76.21 | | 3.61 | | 14.28 | | 3940 | | 41.33 | | | 37.45 | | | 1056 | | | 12.93 | | 12.67 | | 20.75 | | 72.55 | | 15.38 |  | |
| **GD02** | | **Biotite granite** | |  | | 70.62 | | | 0.45 | | 13.76 | |  | |  | 0.06 | | 0.92 | | 1.63 | | 3.1 | | 4.55 | | 0.19 | | 1.11 | | 99.3 | | |  | 87.06 | | 3.88 | | 8.23 | | 2497 | | 32.66 | | | 25.64 | | | 820 | | | 7.04 | | 9.86 | | 9.47 | | 55.86 | | 16.95 |  | |
| **GD04** | |  | | 69.31 | | | 0.47 | | 14.39 | |  | |  | 0.07 | | 1.09 | | 1.86 | | 3.38 | | 3.83 | | 0.18 | | 1.68 | | 99.51 | | |  | 116.01 | | 5.19 | | 8.22 | | 2586 | | 26.7 | | | 25.57 | | | 1033 | | | 7.49 | | 10.01 | | 7.57 | | 57.22 | | 17.96 |  | |
| **GD05** | | **437** | | 69.32 | | | 0.46 | | 14.52 | |  | |  | 0.06 | | 0.98 | | 2.28 | | 3.54 | | 4.18 | | 0.18 | | 0.61 | | 99.29 | | |  | 115.15 | | 3.55 | | 8.36 | | 2554 | | 25.75 | | | 27.64 | | | 934 | | | 7.49 | | 10.87 | | 9.13 | | 69.21 | | 18.42 |  | |
| **GD07** | |  | | 69.63 | | | 0.43 | | 14.61 | |  | |  | 0.06 | | 0.9 | | 2.41 | | 3.49 | | 3.96 | | 0.2 | | 0.82 | | 99.39 | | |  | 95.15 | | 3.21 | | 7.57 | | 2314 | | 26.79 | | | 21.81 | | | 823 | | | 6.68 | | 9.26 | | 17.45 | | 53.53 | | 17.92 |  | |
| **GD08** | | **439** | | 69.73 | | | 0.51 | | 14.31 | |  | |  | 0.08 | | 1.12 | | 2.57 | | 3.57 | | 4.03 | | 0.28 | | 0.68 | | 99.79 | | |  | 98.02 | | 3.51 | | 7.46 | | 2654 | | 28.56 | | | 33.02 | | | 912 | | | 7.97 | | 13.66 | | 12.6 | | 52.38 | | 17.43 |  | |
| **GD10** | |  | | 72.51 | | | 0.43 | | 13.33 | |  | |  | 0.05 | | 0.71 | | 1.76 | | 2.99 | | 4.84 | | 0.26 | | 0.41 | | 99.88 | | |  | 129.19 | | 4.1 | | 7.4 | | 2191 | | 31.15 | | | 18.09 | | | 493 | | | 7.05 | | 5.77 | | 6.68 | | 52.27 | | 20.23 |  | |
| **YL07** | | **Biotite granite** | | **438** | | 69.03 | | | 0.58 | | 14.04 | |  | |  | 0.07 | | 1.04 | | 2.57 | | 3.17 | | 3.87 | | 0.21 | | 0.62 | | 99.21 | | |  | 105.66 | | 3.59 | | 9.97 | | 3218 | | 27.96 | | | 26.15 | | | 1229 | | | 9.05 | | 11.01 | | 11.06 | | 66.33 | | 18.32 |  | |
| **Zhong et al., 2016** | | **WG07-1** | | **Massive granitoids** | |  | | 62.34 | | | 0.67 | | 16.23 | |  | |  | 0.08 | | 2.56 | | 4.97 | | 2.89 | | 2.54 | | 0.177 | | 1.12 | | 98.97 | | | 49 |  | |  | | 15.7 | |  | | 96 | | | 61 | | |  | | | 125 | | 21 | |  | |  | | 20.1 |  | |
| **9JH73** | | **444** | | 62.72 | | | 0.69 | | 17.33 | |  | |  | 0.08 | | 2.56 | | 4.79 | | 2.84 | | 2.67 | | 0.158 | | 1.23 | | 99.99 | | | 51 |  | |  | | 14.6 | |  | | 92 | | | 56 | | |  | | | 18 | | 18 | |  | |  | | 19.9 |  | |
| **9JH67** | |  | | 63.6 | | | 0.88 | | 15.59 | |  | |  | 0.08 | | 3.5 | | 5.12 | | 2.24 | | 1.85 | | 0.232 | | 1.26 | | 99.84 | | | 56 |  | |  | | 6.37 | |  | | 81 | | | 86 | | |  | | | 18 | | 34 | |  | |  | | 17 |  | |
| **9JH72** | |  | | 63.32 | | | 0.61 | | 15.62 | |  | |  | 0.08 | | 2.26 | | 3.41 | | 3.06 | | 2.65 | | 0.146 | | 3.2 | | 98.9 | | | 50 |  | |  | | 6.11 | |  | | 81 | | | 47 | | |  | | | 57 | | 16 | |  | |  | | 18.4 |  | |
| **9JH76** | |  | | 72.48 | | | 0.06 | | 13.89 | |  | |  | 0.05 | | 0.34 | | 0.82 | | 3.02 | | 5.47 | | 0.023 | | 1.08 | | 98.9 | | | 29 |  | |  | | 7.62 | |  | | 7 | | | 7 | | |  | | | 81 | | 3 | |  | |  | | 16.5 |  | |
| **9JH78-2** | |  | | 73.29 | | | 0.03 | | 13.59 | |  | |  | 0.03 | | 0.15 | | 1.22 | | 2.92 | | 5.4 | | 0.015 | | 0.48 | | 98.19 | | | 22 |  | |  | | 5.08 | |  | | 3 | | | 1 | | |  | | | 102 | | 3 | |  | |  | | 14.8 |  | |
| **9JH82** | | **448** | | 74.21 | | | 0.13 | | 13.87 | |  | |  | 0.05 | | 0.33 | | 1.65 | | 2.91 | | 4.34 | | 0.043 | | 0.57 | | 99.75 | | | 29 |  | |  | | 6.86 | |  | | 10 | | | 5 | | |  | | | 2 | | 2 | |  | |  | | 15.3 |  | |
| **9JH49** | | **Gneissoid granitoids** | | **445** | | 74.52 | | | 0.16 | | 13.58 | |  | |  | 0.04 | | 0.52 | | 1.24 | | 2.84 | | 4.4 | | 0.075 | | 0.64 | | 99.74 | | | 38 |  | |  | | 7.01 | |  | | 15 | | | 9 | | |  | | | 3 | | 4 | |  | |  | | 14.7 |  | |
| **09WG-03** | |  | | 69 | | | 0.6 | | 14.08 | |  | |  | 0.08 | | 1.8 | | 2.82 | | 3.41 | | 1.86 | | 0.15 | | 1.15 | | 99.48 | | | 41 |  | |  | | 16.71 | |  | | 127 | | | 70 | | |  | | | 17 | | 33 | |  | |  | | 25.9 |  | |
| **09WG-4** | |  | | 72.1 | | | 0.15 | | 14.15 | |  | |  | 0.04 | | 1.26 | | 1.29 | | 3.04 | | 4.5 | | 0.071 | | 1.9 | | 99.89 | | | 45 |  | |  | | 4.33 | |  | | 21 | | | 7 | | |  | | | 2 | | 2 | |  | |  | | 16.7 |  | |
| **09WG-12** | |  | | 67.06 | | | 0.7 | | 15.04 | |  | |  | 0.05 | | 2.53 | | 3.24 | | 3.14 | | 2.44 | | 0.22 | | 1.03 | | 100 | | | 50 |  | |  | | 22.71 | |  | | 114 | | | 103 | | |  | | | 19 | | 48 | |  | |  | | 23.1 |  | |
| **9JH83** | |  | | 64.53 | | | 0.63 | | 16.44 | |  | |  | 0.09 | | 2.11 | | 1.35 | | 2.1 | | 4.19 | | 0.133 | | 3.05 | | 99.82 | | | 45 |  | |  | | 14.6 | |  | | 80 | | | 63 | | |  | | | 11 | | 31 | |  | |  | | 24.8 |  | |
| **9JH84** | |  | | 71.57 | | | 0.29 | | 15.88 | |  | |  | 0.05 | | 0.9 | | 1.71 | | 4.16 | | 1.79 | | 0.111 | | 1.25 | | 100 | | | 44 |  | |  | | 8.31 | |  | | 40 | | | 9 | | |  | | | 5 | | 5 | |  | |  | | 19.9 |  | |
| **WG-10** | |  | | 70.67 | | | 0.13 | | 15.28 | |  | |  | 0.03 | | 0.5 | | 1.13 | | 3.02 | | 5.58 | | 0.131 | | 1.26 | | 99.03 | | | 44 |  | |  | | 3.58 | |  | | 9 | | | 8 | | |  | | | 126 | | 4 | |  | |  | | 17.5 |  | |
| **WG-11** | |  | | 73.01 | | | 0.12 | | 14.43 | |  | |  | 0.03 | | 0.43 | | 1.35 | | 3.13 | | 4.99 | | 0.134 | | 0.93 | | 99.8 | | | 41 |  | |  | | 3.41 | |  | | 9 | | | 7 | | |  | | | 150 | | 5 | |  | |  | | 16.9 |  | |
| **WG-15** | |  | | 69.28 | | | 0.41 | | 15.29 | |  | |  | 0.06 | | 1.15 | | 2.82 | | 3.15 | | 3.32 | | 0.125 | | 1.2 | | 99.91 | | | 43 |  | |  | | 8.38 | |  | | 39 | | | 17 | | |  | | | 125 | | 8 | |  | |  | | 19.8 |  | |
| **WG-16** | |  | | 67.25 | | | 0.4 | | 15.31 | |  | |  | 0.05 | | 1.59 | | 2.66 | | 2.61 | | 4.57 | | 0.121 | | 0.97 | | 98.67 | | | 51 |  | |  | | 6.79 | |  | | 43 | | | 27 | | |  | | | 202 | | 12 | |  | |  | | 16.9 |  | |
| **WG-18** | |  | | 71.65 | | | 0.33 | | 14.03 | |  | |  | 0.04 | | 0.71 | | 1.57 | | 2.5 | | 5.71 | | 0.149 | | 0.89 | | 99.83 | | | 39 |  | |  | | 4.53 | |  | | 18 | | | 13 | | |  | | | 122 | | 6 | |  | |  | | 19.3 |  | |
| **WG-19** | |  | | 72.41 | | | 0.12 | | 14.75 | |  | |  | 0.02 | | 0.34 | | 1.18 | | 3.94 | | 3.63 | | 0.183 | | 0.96 | | 98.86 | | | 34 |  | |  | | 3.3 | |  | | 7 | | | 5 | | |  | | | 111 | | 3 | |  | |  | | 18.4 |  | |
| **WG-20** | |  | | 71.98 | | | 0.2 | | 14.33 | |  | |  | 0.03 | | 0.55 | | 1.01 | | 2.73 | | 5.65 | | 0.146 | | 1.03 | | 99.26 | | | 41 |  | |  | | 3.6 | |  | | 10 | | | 8 | | |  | | | 149 | | 4 | |  | |  | | 19.4 |  | |
| **Yu et al., 2016** | | **10-1** | | **Granodiorites** | |  | | 62.17 | | | 0.77 | | 17 | | 5.57 | |  | 0.1 | | 2.79 | | 4.76 | | 2.81 | | 2.64 | | 0.19 | | 0.81 | | 99.61 | | | 0.52 |  | |  | | 17.5 | | 4401 | | 121 | | | 251 | | |  | | | 13.9 | | 20.3 | | 23.6 | | 74.9 | |  |  | |
| **10-2** | |  | | 63.78 | | | 0.65 | | 16.99 | | 4.75 | |  | 0.08 | | 2.25 | | 4.49 | | 2.98 | | 2.64 | | 0.17 | | 0.84 | | 99.62 | | | 0.5 |  | |  | | 12.4 | | 3412 | | 91 | | | 192 | | |  | | | 10.9 | | 16.7 | | 13 | | 70.9 | |  |  | |
| **10-3** | | **438** | | 61.94 | | | 0.75 | | 17.28 | | 5.58 | |  | 0.1 | | 2.6 | | 4.41 | | 2.89 | | 2.89 | | 0.2 | | 0.96 | | 99.62 | | | 0.5 |  | |  | | 16.9 | | 4209 | | 108 | | | 137 | | |  | | | 13.2 | | 19.5 | | 26.2 | | 79.4 | |  |  | |
| **10-4** | |  | | 64.1 | | | 0.68 | | 16.47 | | 4.98 | |  | 0.09 | | 2.32 | | 4.45 | | 2.83 | | 2.58 | | 0.18 | | 0.94 | | 99.61 | | | 0.5 |  | |  | | 16.5 | | 3833 | | 101 | | | 222 | | |  | | | 11.5 | | 18.1 | | 18.1 | | 70.6 | |  |  | |
| **10-5** | |  | | 64.18 | | | 0.64 | | 16.53 | | 4.8 | |  | 0.08 | | 2.32 | | 4.41 | | 2.88 | | 2.73 | | 0.15 | | 0.88 | | 99.61 | | | 0.51 |  | |  | | 15.1 | | 3575 | | 101 | | | 248 | | |  | | | 11.5 | | 17.4 | | 18.7 | | 60.2 | |  |  | |
| **10-6** | |  | | 64.18 | | | 0.67 | | 16.31 | | 5.16 | |  | 0.09 | | 2.46 | | 4.46 | | 2.91 | | 2.45 | | 0.16 | | 0.77 | | 99.61 | | | 0.5 |  | |  | | 16.6 | | 3793 | | 104 | | | 211 | | |  | | | 12.7 | | 18.7 | | 25.8 | | 68.5 | |  |  | |
| **10-16** | |  | | 63.72 | | | 0.63 | | 17.03 | | 4.63 | |  | 0.08 | | 2.16 | | 4.46 | | 3 | | 2.83 | | 0.17 | | 0.91 | | 99.62 | | | 0.5 |  | |  | | 16.8 | | 3999 | | 124 | | | 163 | | |  | | | 18.4 | | 27.4 | | 11.9 | | 80 | |  |  | |
| **10-12** | |  | | 64.13 | | | 0.64 | | 16.72 | | 4.78 | |  | 0.08 | | 2.22 | | 4.36 | | 2.87 | | 2.85 | | 0.16 | | 0.79 | | 99.61 | | | 0.5 |  | |  | | 12.7 | | 3366 | | 94 | | | 176 | | |  | | | 11.7 | | 17.3 | | 15.7 | | 69.4 | |  |  | |
| **10-13** | | **438** | | 64.93 | | | 0.63 | | 16.31 | | 4.64 | |  | 0.08 | | 2.18 | | 4.3 | | 2.88 | | 2.75 | | 0.16 | | 0.74 | | 99.61 | | | 0.5 |  | |  | | 12.8 | | 3421 | | 87 | | | 190 | | |  | | | 11.1 | | 16.8 | | 14.2 | | 69.3 | |  |  | |
| **10-11** | | **MMEs** | |  | | 61.77 | | | 0.66 | | 16.11 | | 6.19 | |  | 0.14 | | 3.38 | | 5.54 | | 2.79 | | 1.98 | | 0.13 | | 0.9 | | 99.61 | | | 0.54 |  | |  | | 19.7 | | 3650 | | 112 | | | 189 | | |  | | | 15.9 | | 25.1 | | 19.6 | | 85.9 | |  |  | |
| **10-14** | |  | | 61.9 | | | 0.85 | | 16.22 | | 6.48 | |  | 0.12 | | 3.31 | | 4.8 | | 3.04 | | 2.29 | | 0.18 | | 0.43 | | 99.62 | | | 0.52 |  | |  | | 15.4 | | 4733 | | 117 | | | 169 | | |  | | | 16.5 | | 23.3 | | 11.5 | | 84.1 | |  |  | |
| **10-15** | | **433** | | 59.86 | | | 0.75 | | 16.35 | | 6.5 | |  | 0.14 | | 4.09 | | 5.96 | | 3.14 | | 2.04 | | 0.14 | | 0.67 | | 99.63 | | | 0.57 |  | |  | | 12.2 | | 3275 | | 81 | | | 165 | | |  | | | 10.8 | | 16.5 | | 15.4 | | 69.7 | |  |  | |
| **Guan et al., 2014** | | **YH-1** | | **Hongxiaqiao granodiorite** | | **434** | | 65 | | | 0.58 | | 15.4 | |  | |  | 0.06 | | 2.56 | | 4.11 | | 2.7 | | 3.17 | | 0.16 | | 1.72 | | 99.9 | | | 57.2 |  | |  | | 12.8 | |  | | 87 | | | 69.6 | | |  | | | 44.4 | | 36.5 | | 23.5 | | 50.2 | | 18 |  | |
| **YH-2** | | 65.2 | | | 0.61 | | 15.5 | |  | |  | 0.06 | | 2.66 | | 4.05 | | 2.72 | | 3.26 | | 0.17 | | 0.93 | | 99.9 | | | 57 |  | |  | | 12.3 | |  | | 87.5 | | | 63.2 | | |  | | | 45.9 | | 40 | | 29.2 | | 53.3 | | 17.4 |  | |
| **YH-3** | | 65.3 | | | 0.6 | | 15.5 | |  | |  | 0.06 | | 2.61 | | 4.18 | | 2.76 | | 3.1 | | 0.17 | | 0.98 | | 99.9 | | | 56.8 |  | |  | | 12.5 | |  | | 83.6 | | | 67.9 | | |  | | | 43.5 | | 36.5 | | 29.3 | | 49.8 | | 17.1 |  | |
| **YH-4** | | 65.2 | | | 0.58 | | 15.6 | |  | |  | 0.06 | | 2.52 | | 4.13 | | 2.76 | | 3.14 | | 0.16 | | 1.07 | | 99.9 | | | 56.2 |  | |  | | 11.7 | |  | | 93.3 | | | 193 | | |  | | | 14 | | 38.2 | | 23.3 | | 49.7 | | 17.3 |  | |
| **YH-5** | | 64.8 | | | 0.62 | | 15.6 | |  | |  | 0.06 | | 2.69 | | 4.07 | | 2.67 | | 3.12 | | 0.16 | | 1.22 | | 99.9 | | | 56.8 |  | |  | | 14 | |  | | 100 | | | 75.9 | | |  | | | 62.8 | | 39 | | 26.2 | | 53.9 | | 18.5 |  | |
| **YH-6** | | 64.4 | | | 0.6 | | 15.4 | |  | |  | 0.06 | | 2.67 | | 3.75 | | 2.71 | | 3.2 | | 0.16 | | 2.52 | | 99.9 | | | 58 |  | |  | | 13.9 | |  | | 92.2 | | | 73.6 | | |  | | | 60.5 | | 39 | | 40.9 | | 53.8 | | 18.4 |  | |
| **YH-7** | | 64.9 | | | 0.6 | | 15.5 | |  | |  | 0.06 | | 2.65 | | 4.19 | | 2.68 | | 3.21 | | 0.16 | | 1.28 | | 99.9 | | | 57 |  | |  | | 12.7 | |  | | 93.1 | | | 75.3 | | |  | | | 50.2 | | 37.9 | | 22.2 | | 55.6 | | 18.1 |  | |
| **YH-8** | | 65 | | | 0.6 | | 15.5 | |  | |  | 0.06 | | 2.64 | | 4.28 | | 2.74 | | 3.16 | | 0.16 | | 0.95 | | 99.9 | | | 56.5 |  | |  | | 12.1 | |  | | 97.1 | | | 200 | | |  | | | 14.5 | | 39 | | 28 | | 50.8 | | 17.6 |  | |
| **YH-9** | | 65.3 | | | 0.61 | | 15.5 | |  | |  | 0.06 | | 2.64 | | 4.23 | | 2.75 | | 3.18 | | 0.16 | | 0.84 | | 99.9 | | | 57 |  | |  | | 13 | |  | | 92.7 | | | 78 | | |  | | | 40.2 | | 39 | | 27.1 | | 53.2 | | 18.1 |  | |
| **YH-10** | | 65.2 | | | 0.59 | | 15.4 | |  | |  | 0.06 | | 2.63 | | 3.93 | | 2.74 | | 3.32 | | 0.17 | | 1.33 | | 99.9 | | | 57.6 |  | |  | | 13 | |  | | 88.6 | | | 73 | | |  | | | 56.1 | | 37.1 | | 25.5 | | 49.9 | | 17.6 |  | |
| **YH-11** | | 65.2 | | | 0.59 | | 15.4 | |  | |  | 0.06 | | 2.6 | | 4.18 | | 2.67 | | 3.33 | | 0.17 | | 1.24 | | 99.9 | | | 57.4 |  | |  | | 12.8 | |  | | 90.6 | | | 65.7 | | |  | | | 42 | | 35.7 | | 19.5 | | 51.5 | | 16.8 |  | |
| **YH-12** | | 64 | | | 0.6 | | 15.4 | |  | |  | 0.07 | | 2.76 | | 4.12 | | 2.59 | | 3.35 | | 0.17 | | 2.18 | | 99.9 | | | 58 |  | |  | | 14 | |  | | 111 | | | 85.2 | | |  | | | 52.1 | | 40.8 | | 29.6 | | 57.8 | | 18.1 |  | |
| **YH-13** | | 64.2 | | | 0.63 | | 15.6 | |  | |  | 0.07 | | 2.82 | | 3.73 | | 2.63 | | 3.28 | | 0.17 | | 2 | | 99.9 | | | 58 |  | |  | | 13.4 | |  | | 94.5 | | | 72 | | |  | | | 40.3 | | 36.6 | | 26.7 | | 53.8 | | 18.2 |  | |
| **YH-14** | | 64.9 | | | 0.59 | | 15.5 | |  | |  | 0.06 | | 2.57 | | 3.93 | | 2.65 | | 3.32 | | 0.16 | | 1.69 | | 99.9 | | | 57.2 |  | |  | | 12.4 | |  | | 84.6 | | | 66 | | |  | | | 41.4 | | 35.5 | | 74.2 | | 50.9 | | 17.9 |  | |
| **YH-15** | | 65.3 | | | 0.58 | | 15.5 | |  | |  | 0.06 | | 2.5 | | 3.89 | | 2.66 | | 3.34 | | 0.15 | | 1.53 | | 99.9 | | | 57 |  | |  | | 11.4 | |  | | 80.8 | | | 58.9 | | |  | | | 45.7 | | 33.7 | | 71.4 | | 48.2 | | 17.2 |  | |
| **YH-16** | | 65 | | | 0.59 | | 15.5 | |  | |  | 0.06 | | 2.57 | | 3.92 | | 2.65 | | 3.36 | | 0.16 | | 1.5 | | 99.9 | | | 57 |  | |  | | 11.3 | |  | | 81.4 | | | 61.9 | | |  | | | 37.6 | | 34.1 | | 75.2 | | 48.4 | | 16.8 |  | |
| **YH-17** | | 64.8 | | | 0.57 | | 15.4 | |  | |  | 0.06 | | 2.55 | | 3.81 | | 2.64 | | 3.3 | | 0.16 | | 2.21 | | 99.9 | | | 57.2 |  | |  | | 12.4 | |  | | 85.7 | | | 65.2 | | |  | | | 33.6 | | 38 | | 70.2 | | 51.2 | | 17.6 |  | |
| **YH-18** | | 64.4 | | | 0.61 | | 15.6 | |  | |  | 0.07 | | 3.06 | | 3.49 | | 2.8 | | 3.29 | | 0.18 | | 1.73 | | 99.9 | | | 60.4 |  | |  | | 14.1 | |  | | 93.7 | | | 77.9 | | |  | | | 45.6 | | 40.1 | | 17.9 | | 50.9 | | 17.6 |  | |
| **YH-19** | | 64.5 | | | 0.63 | | 15.6 | |  | |  | 0.07 | | 2.77 | | 4.34 | | 2.6 | | 3.14 | | 0.17 | | 1.3 | | 99.9 | | | 57.4 |  | |  | | 13.2 | |  | | 94.7 | | | 78 | | |  | | | 47.7 | | 38.2 | | 44.3 | | 54.1 | | 18.1 |  | |
| **YH-20** | | 65 | | | 0.59 | | 15.6 | |  | |  | 0.06 | | 2.63 | | 4.15 | | 2.61 | | 3.2 | | 0.16 | | 1.44 | | 99.9 | | | 57.6 |  | |  | | 13.2 | |  | | 89.3 | | | 61.7 | | |  | | | 49.3 | | 35.4 | | 21.8 | | 47.7 | | 17.3 |  | |
| **YH-21** | | 64.6 | | | 0.61 | | 15.5 | |  | |  | 0.07 | | 2.67 | | 4.15 | | 2.75 | | 3.23 | | 0.17 | | 1.61 | | 99.9 | | | 57.7 |  | |  | | 13.6 | |  | | 101 | | | 73.9 | | |  | | | 58.6 | | 38.5 | | 22.2 | | 52.3 | | 17.7 |  | |
| **YH-22** | | 65.2 | | | 0.6 | | 15.6 | |  | |  | 0.06 | | 2.67 | | 3.34 | | 2.7 | | 3.15 | | 0.16 | | 1.82 | | 99.9 | | | 57.8 |  | |  | | 12.2 | |  | | 82.9 | | | 60.6 | | |  | | | 38.4 | | 34.8 | | 59.8 | | 49.2 | | 17 |  | |
| **YH-23** | | 65 | | | 0.59 | | 15.7 | |  | |  | 0.07 | | 2.59 | | 3.97 | | 2.71 | | 3.31 | | 0.16 | | 1.16 | | 99.9 | | | 56.7 |  | |  | | 12.3 | |  | | 93.9 | | | 209 | | |  | | | 14.2 | | 38.1 | | 22.5 | | 53.9 | | 18.1 |  | |
| **YH-24** | | 65.2 | | | 0.61 | | 15.6 | |  | |  | 0.07 | | 2.73 | | 4.39 | | 2.73 | | 2.95 | | 0.17 | | 0.74 | | 99.9 | | | 57.4 |  | |  | | 13.4 | |  | | 91.7 | | | 79.4 | | |  | | | 41.2 | | 38.6 | | 30.9 | | 53 | | 18.5 |  | |
| **YH-25** | | 65.3 | | | 0.58 | | 15.7 | |  | |  | 0.06 | | 2.62 | | 4.36 | | 2.75 | | 3.07 | | 0.16 | | 0.83 | | 99.9 | | | 57.6 |  | |  | | 12.4 | |  | | 85.7 | | | 66.6 | | |  | | | 47.9 | | 38.5 | | 20.6 | | 50.5 | | 18.1 |  | |
| **YH-26** | | 65.4 | | | 0.58 | | 15.5 | |  | |  | 0.06 | | 2.55 | | 4.24 | | 2.63 | | 3.27 | | 0.17 | | 0.96 | | 99.9 | | | 57 |  | |  | | 11.4 | |  | | 82 | | | 58.7 | | |  | | | 44.4 | | 34.3 | | 29 | | 46.5 | | 16.3 |  | |
| **YH-27** | | 64.9 | | | 0.61 | | 15.5 | |  | |  | 0.06 | | 2.69 | | 4.01 | | 2.5 | | 3.41 | | 0.16 | | 1.49 | | 99.9 | | | 57.5 |  | |  | | 12.9 | |  | | 87 | | | 63.5 | | |  | | | 44.3 | | 37.8 | | 49.5 | | 52.6 | | 18.8 |  | |
| **YH-28** | | 64.2 | | | 0.64 | | 15.6 | |  | |  | 0.07 | | 2.88 | | 4.42 | | 2.65 | | 3.07 | | 0.17 | | 1.15 | | 99.9 | | | 56.9 |  | |  | | 13.5 | |  | | 115 | | | 202 | | |  | | | 16.1 | | 40.8 | | 34.7 | | 54 | | 17.4 |  | |
| **10BG1-01** | | **MMEs** | | **429** | | 55.9 | | | 0.86 | | 17 | |  | |  | 0.15 | | 4.93 | | 6.02 | | 2.88 | | 2.72 | | 0.23 | | 1.41 | | 99.6 | | | 60.9 |  | |  | | 17.6 | |  | | 110 | | | 132 | | |  | | | 16.7 | | 30.5 | | 141 | | 60.1 | | 14 |  | |
| **10BG1-02** | | 53.2 | | | 0.81 | | 16.7 | |  | |  | 0.17 | | 5.84 | | 6.91 | | 3.06 | | 2.1 | | 0.4 | | 2.04 | | 99.6 | | | 62 |  | |  | | 18.9 | |  | | 112 | | | 154 | | |  | | | 20.7 | | 71.8 | | 178 | | 65.5 | | 14.7 |  | |
| **10BG1-04** | | 53.2 | | | 0.8 | | 16.7 | |  | |  | 0.17 | | 5.9 | | 6.89 | | 2.97 | | 2.22 | | 0.37 | | 1.95 | | 99.6 | | | 62.2 |  | |  | | 18.4 | |  | | 113 | | | 155 | | |  | | | 21.2 | | 73.7 | | 167 | | 65.6 | | 14.5 |  | |
| **10BG1-06** | | 54.9 | | | 0.92 | | 17.1 | |  | |  | 0.15 | | 5.25 | | 6.15 | | 2.91 | | 2.61 | | 0.26 | | 1.45 | | 99.6 | | | 60.8 |  | |  | | 18.5 | |  | | 120 | | | 119 | | |  | | | 18 | | 30 | | 150 | | 64.2 | | 14.2 |  | |
| **10BG2-3** | | 58.7 | | | 0.85 | | 17.8 | |  | |  | 0.09 | | 2.98 | | 5.08 | | 3.13 | | 2.79 | | 0.24 | | 1.76 | | 99.6 | | | 53 |  | |  | | 11.8 | |  | | 100 | | | 69.5 | | |  | | | 12.7 | | 11.9 | | 47.6 | | 44.1 | | 13.6 |  | |
| **10BG2-4** | | 53.2 | | | 0.84 | | 13.8 | |  | |  | 0.11 | | 9.28 | | 5.96 | | 1.97 | | 3.21 | | 0.28 | | 3.68 | | 99.6 | | | 74.7 |  | |  | | 16.1 | |  | | 100 | | | 418 | | |  | | | 25.7 | | 171 | | 7.9 | | 52.6 | | 11.2 |  | |
| **10BG2-5** | | 52.2 | | | 0.85 | | 13.8 | |  | |  | 0.11 | | 8.56 | | 6.19 | | 2.29 | | 1.5 | | 0.28 | | 6.89 | | 100 | | | 73.2 |  | |  | | 16 | |  | | 101 | | | 424 | | |  | | | 24.3 | | 145 | | 9.4 | | 60 | | 11.5 |  | |
| **YLL-1** | | **Banshanpu granodiorite** | | **432** | | 68.7 | | | 0.41 | | 15.5 | |  | |  | 0.04 | | 1.48 | | 3.16 | | 3.09 | | 3.1 | | 0.1 | | 1.33 | | 99.9 | | | 54.1 |  | |  | | 6.43 | |  | | 49.3 | | | 29.9 | | |  | | | 49.2 | | 19.7 | | 10.8 | | 40 | | 16.4 |  | |
| **YLL-2** | | 68.6 | | | 0.42 | | 15.6 | |  | |  | 0.04 | | 1.54 | | 2.84 | | 3.14 | | 3.14 | | 0.1 | | 1.51 | | 99.9 | | | 54.9 |  | |  | | 6.38 | |  | | 47.8 | | | 25.9 | | |  | | | 38.7 | | 19 | | 10.6 | | 40.4 | | 16.1 |  | |
| **YLL-3** | | 69 | | | 0.41 | | 15.4 | |  | |  | 0.04 | | 1.47 | | 2.43 | | 3.16 | | 3.17 | | 0.1 | | 1.84 | | 99.9 | | | 54.4 |  | |  | | 6.84 | |  | | 49.3 | | | 25.9 | | |  | | | 30.6 | | 19.3 | | 12.1 | | 44.8 | | 16.7 |  | |
| **YLL-4** | | 69.1 | | | 0.4 | | 15.6 | |  | |  | 0.04 | | 1.44 | | 3.05 | | 3.09 | | 2.89 | | 0.1 | | 1.35 | | 99.9 | | | 54 |  | |  | | 6.7 | |  | | 52.5 | | | 40.4 | | |  | | | 48.5 | | 19.7 | | 10.2 | | 41.6 | | 16.9 |  | |
| **YLL-5** | | 69.7 | | | 0.4 | | 15.2 | |  | |  | 0.04 | | 1.46 | | 2.64 | | 3 | | 3.12 | | 0.11 | | 1.29 | | 99.8 | | | 53.8 |  | |  | | 6.67 | |  | | 48.6 | | | 24.9 | | |  | | | 39.5 | | 17.5 | | 9.6 | | 37.7 | | 15.8 |  | |
| **YLL-6** | | 69.3 | | | 0.38 | | 15.2 | |  | |  | 0.04 | | 1.37 | | 2.97 | | 3.04 | | 3.24 | | 0.08 | | 1.38 | | 99.8 | | | 53.4 |  | |  | | 6.78 | |  | | 50.6 | | | 28.3 | | |  | | | 41.9 | | 18.3 | | 11.1 | | 37.5 | | 15.9 |  | |
| **YLL-7** | | 69.1 | | | 0.42 | | 15.4 | |  | |  | 0.04 | | 1.58 | | 2.87 | | 3.04 | | 2.97 | | 0.11 | | 1.36 | | 99.9 | | | 55.3 |  | |  | | 7.17 | |  | | 51.1 | | | 26.2 | | |  | | | 49.9 | | 18.8 | | 14.7 | | 40.4 | | 16.6 |  | |
| **YLL-8** | | 69.1 | | | 0.41 | | 15.4 | |  | |  | 0.04 | | 1.46 | | 3.14 | | 3.1 | | 2.71 | | 0.11 | | 1.47 | | 99.9 | | | 53.5 |  | |  | | 6.08 | |  | | 51.2 | | | 28.4 | | |  | | | 30.5 | | 18.7 | | 11 | | 40.8 | | 16.5 |  | |
| **YLL-9** | | 69.2 | | | 0.42 | | 15.5 | |  | |  | 0.04 | | 1.43 | | 3.17 | | 3.06 | | 2.87 | | 0.11 | | 1.06 | | 99.8 | | | 52.7 |  | |  | | 6.91 | |  | | 53.2 | | | 27.3 | | |  | | | 32.4 | | 18.8 | | 14.4 | | 43.2 | | 17.6 |  | |
| **YLL-10** | | 69.2 | | | 0.4 | | 15.6 | |  | |  | 0.04 | | 1.44 | | 3.09 | | 3.05 | | 3.17 | | 0.1 | | 0.9 | | 99.8 | | | 53.9 |  | |  | | 6.46 | |  | | 54.5 | | | 28.5 | | |  | | | 41.5 | | 18.8 | | 13.6 | | 39.3 | | 16.9 |  | |
| **YLL-11** | | 69.6 | | | 0.37 | | 15.2 | |  | |  | 0.04 | | 1.36 | | 2.9 | | 2.85 | | 3.46 | | 0.09 | | 1.32 | | 99.8 | | | 54.1 |  | |  | | 7.85 | |  | | 45.4 | | | 27.2 | | |  | | | 34.6 | | 17.7 | | 9.7 | | 37.4 | | 15.4 |  | |
| **YLL-12** | | 68.7 | | | 0.43 | | 15.6 | |  | |  | 0.04 | | 1.48 | | 2.83 | | 3.21 | | 2.78 | | 0.12 | | 1.68 | | 99.9 | | | 53 |  | |  | | 5.57 | |  | | 51.7 | | | 25.7 | | |  | | | 31.2 | | 19.3 | | 9.4 | | 42 | | 17.7 |  | |
| **Tang et al., 2021** | | **HZDN18-03-1** | | **Daning granodiorite** | | **419.5** | | 68.96 | | | 0.38 | | 15.08 | | 2.71 | |  | 0.05 | | 1.35 | | 1.65 | | 3.03 | | 5.07 | | 0.13 | | 1.6 | | 100 | | |  | 18.03 | | 2.96 | | 8.68 | | 2407 | | 58.02 | | | 7.42 | | | 395 | | | 7.92 | | 8.96 | | 12.69 | | 33.02 | | 16.31 |  | |
| **DN18-25** | | **420** | | 69.56 | | | 0.45 | | 14.67 | | 3.16 | |  | 0.06 | | 1.44 | | 1.77 | | 3.28 | | 4.48 | | 0.16 | | 1.59 | | 100.61 | | |  | 21.28 | | 2.86 | | 10.09 | | 2824 | | 53.41 | | | 12.52 | | | 568 | | | 10.27 | | 11.46 | | 7.81 | | 50.58 | | 16.36 |  | |
| **DN18-26** | | **419** | | 64.38 | | | 0.83 | | 15.54 | | 5.5 | |  | 0.1 | | 2.52 | | 3.77 | | 2.97 | | 3.5 | | 0.22 | | 1 | | 100.32 | | |  | 26.36 | | 3.28 | | 18.79 | | 4926 | | 116.26 | | | 17.46 | | | 820 | | | 17.96 | | 21.2 | | 31.56 | | 77.53 | | 18.72 |  | |
| **DN18-28** | | **421.7** | | 69.33 | | | 0.43 | | 14.62 | | 3.39 | |  | 0.09 | | 1.36 | | 2.3 | | 3.44 | | 3.65 | | 0.16 | | 0.6 | | 99.37 | | |  | 24.36 | | 3.33 | | 11.44 | | 2602 | | 66.83 | | | 7.28 | | | 780 | | | 8.89 | | 7.03 | | 7.52 | | 55.79 | | 15.49 |  | |
| **XXK18-04–1** | | **Guiling monzonitic granite** | | **416** | | 73.55 | | | 0.31 | | 13.6 | | 1.8 | |  | 0.05 | | 0.83 | | 1.05 | | 2.46 | | 6.15 | | 0.11 | | 0.4 | | 100.33 | | |  | 41.19 | | 3.61 | | 5.28 | | 2009 | | 33.82 | | | 7.15 | | | 472 | | | 5.31 | | 7.52 | | 29.41 | | 30.6 | | 14.71 |  | |
| **XXK18-05–1** | |  | | 65.69 | | | 0.38 | | 14.09 | | 2.58 | |  | 0.17 | | 2.26 | | 2.37 | | 4.04 | | 5.56 | | 0.06 | | 1.98 | | 99.18 | | |  | 8.54 | | 1.46 | | 6.15 | | 2120 | | 38.25 | | | 8.33 | | | 1280 | | | 4.31 | | 6.61 | | 19.35 | | 45.64 | | 13.85 |  | |
| **XXK18-06–1** | |  | | 68.76 | | | 0.56 | | 15.92 | | 2.58 | |  | 0.07 | | 0.87 | | 1.05 | | 3.11 | | 6.32 | | 0.17 | | 1.39 | | 100.79 | | |  | 20.27 | | 4.41 | | 10.69 | | 3509 | | 43.23 | | | 2.23 | | | 560 | | | 15.12 | | 3 | | 120.2 | | 49.34 | | 17.15 |  | |
| **GL18-07–1** | | **418.5** | | 74.26 | | | 0.28 | | 13.29 | | 1.97 | |  | 0.05 | | 0.72 | | 1.17 | | 2.9 | | 4.96 | | 0.1 | | 1 | | 100.7 | | |  | 24.26 | | 4.36 | | 6.06 | | 1821 | | 32.55 | | | 3.72 | | | 416 | | | 4.72 | | 4.3 | | 10.91 | | 28.83 | | 14.75 |  | |
| **Xu and Xu, 2017** | | **14RH01** | | **Monzonorite** | |  | | 52.02 | | | 0.69 | | 11.97 | |  | |  | 0.18 | | 10.16 | | 9.16 | | 1.46 | | 1.56 | | 0.32 | | 1.59 | | 100.31 | | |  |  | |  | |  | |  | | 653.00 | | | 648.00 | | |  | | | 50.20 | | 140.00 | |  | |  | | 16.20 |  | |
| **14RH02** | |  | | 53.72 | | | 0.79 | | 12.53 | |  | |  | 0.17 | | 9.16 | | 8.29 | | 1.75 | | 2.18 | | 0.31 | | 1.19 | | 100.47 | | |  |  | |  | |  | |  | | 610.00 | | | 570.00 | | |  | | | 44.60 | | 147.00 | |  | |  | | 16.50 |  | |
| **13SX08** | | **440** | | 54.82 | | | 0.81 | | 12.63 | |  | |  | 0.14 | | 8.89 | | 7.10 | | 2.14 | | 2.83 | | 0.40 | | 0.96 | | 99.33 | | |  |  | |  | |  | |  | | 270.00 | | | 525.00 | | |  | | | 32.40 | | 149.00 | |  | |  | | 15.80 |  | |
| **13SX09** | |  | | 51.93 | | | 0.78 | | 12.36 | |  | |  | 0.16 | | 10.74 | | 8.55 | | 1.93 | | 1.81 | | 0.39 | | 1.54 | | 99.94 | | |  |  | |  | |  | |  | | 283.00 | | | 518.00 | | |  | | | 36.10 | | 141.00 | |  | |  | | 15.40 |  | |
| **13SX13** | | **Granite** | | **441** | | 63.44 | | | 0.60 | | 15.64 | |  | |  | 0.09 | | 2.11 | | 4.57 | | 3.16 | | 3.77 | | 0.26 | | 0.71 | | 99.40 | | |  |  | |  | |  | |  | | 69.40 | | | 80.30 | | |  | | | 16.80 | | 21.90 | |  | |  | | 20.10 |  | |
| **13SX14** | |  | | 62.26 | | | 0.65 | | 16.14 | |  | |  | 0.09 | | 2.34 | | 4.81 | | 2.97 | | 3.91 | | 0.27 | | 0.92 | | 99.48 | | |  |  | |  | |  | |  | | 66.30 | | | 69.00 | | |  | | | 16.60 | | 23.20 | |  | |  | | 19.20 |  | |
| **14RH03** | |  | | 61.72 | | | 0.65 | | 16.43 | |  | |  | 0.09 | | 2.55 | | 4.83 | | 2.72 | | 3.86 | | 0.23 | | 0.96 | | 99.82 | | |  |  | |  | |  | |  | | 90.60 | | | 51.10 | | |  | | | 12.00 | | 33.70 | |  | |  | | 18.90 |  | |
| **14RH031** | | **MME** | |  | | 56.21 | | | 0.82 | | 14.41 | |  | |  | 0.18 | | 5.27 | | 6.88 | | 2.46 | | 3.37 | | 0.28 | | 1.00 | | 100.23 | | |  |  | |  | |  | |  | | 280.00 | | | 104.00 | | |  | | | 30.40 | | 68.10 | |  | |  | | 18.50 |  | |
| **Xu and Xu, 2015** | | **GD13** | | **Two-mica granite** | |  | | 73.23 | | | 0.40 | | 12.78 | |  | |  | 0.03 | | 0.68 | | 0.85 | | 2.05 | | 4.97 | | 0.23 | | 1.61 | | 99.31 | | |  | 37.29 | | 1.42 | | 5.62 | | 2078.00 | | | 28.34 | | | 16.70 | | | 474.00 | | 5.16 | | 6.27 | | 8.25 | | 44.98 | | 16.40 |  | | |
| **GD14** | | **436** | | 68.16 | | | 0.62 | | 14.43 | |  | |  | 0.06 | | 1.27 | | 1.52 | | 2.95 | | 4.37 | | 0.25 | | 1.77 | | 99.21 | | |  | 90.06 | | 4.12 | | 9.65 | | 3267.00 | | | 29.79 | | | 42.49 | | | 1017.00 | | 8.79 | | 14.70 | | 13.81 | | 81.59 | | 18.13 |  | | |
| **GD16** | |  | | 68.25 | | | 0.45 | | 15.34 | |  | |  | 0.06 | | 0.75 | | 1.89 | | 3.64 | | 5.08 | | 0.23 | | 1.00 | | 99.45 | | |  | 120.36 | | 3.56 | | 6.54 | | 2344.00 | | | 30.99 | | | 24.63 | | | 868.00 | | 5.76 | | 9.58 | | 5.32 | | 50.86 | | 20.67 |  | | |
| **GD17** | |  | | 72.50 | | | 0.27 | | 14.03 | |  | |  | 0.05 | | 0.57 | | 1.63 | | 3.33 | | 4.17 | | 0.18 | | 0.56 | | 99.02 | | |  | 115.81 | | 3.64 | | 4.53 | | 1379.00 | | | 22.15 | | | 44.04 | | | 712.00 | | 4.06 | | 19.72 | | 11.05 | | 40.01 | | 15.71 |  | | |
| **GD18** | | **433** | | 72.43 | | | 0.26 | | 13.95 | |  | |  | 0.04 | | 0.66 | | 1.69 | | 3.19 | | 4.10 | | 0.16 | | 0.61 | | 99.00 | | |  | 128.26 | | 3.49 | | 5.29 | | 1447.00 | | | 25.49 | | | 21.97 | | | 772.00 | | 4.40 | | 8.10 | | 9.07 | | 41.54 | | 16.77 |  | | |
| **GD20** | |  | | 70.39 | | | 0.34 | | 14.40 | |  | |  | 0.05 | | 0.50 | | 1.69 | | 3.07 | | 5.30 | | 0.13 | | 0.81 | | 99.22 | | |  | 86.20 | | 2.45 | | 7.25 | | 1836.00 | | | 17.74 | | | 16.30 | | | 729.00 | | 4.04 | | 6.27 | | 2.60 | | 50.39 | | 18.34 |  | | |
| **GD22** | |  | | 75.40 | | | 0.24 | | 12.38 | |  | |  | 0.06 | | 0.60 | | 0.97 | | 3.11 | | 3.69 | | 0.15 | | 1.07 | | 99.52 | | |  | 112.38 | | 4.85 | | 5.32 | | 1223.00 | | | 14.58 | | | 13.87 | | | 1077.00 | | 3.15 | | 4.74 | | 1.96 | | 38.01 | | 16.46 |  | | |
| **YL03** | | **Two-mica granite** | |  | | 70.26 | | | 0.39 | | 14.35 | |  | |  | 0.06 | | 0.88 | | 1.71 | | 3.19 | | 4.59 | | 0.21 | | 0.88 | | 99.17 | | |  | 110.98 | | 3.46 | | 6.83 | | 1965.00 | | | 29.61 | | | 23.83 | | | 965.00 | | 6.05 | | 9.41 | | 6.36 | | 47.74 | | 17.03 |  | | |
| **YL04** | |  | | 72.65 | | | 0.45 | | 13.03 | |  | |  | 0.07 | | 0.94 | | 1.71 | | 2.92 | | 4.20 | | 0.29 | | 1.08 | | 100.21 | | |  | 105.15 | | 3.97 | | 7.26 | | 2345.00 | | | 27.49 | | | 27.97 | | | 975.00 | | 6.48 | | 10.42 | | 5.41 | | 54.89 | | 18.17 |  | | |
| **YL05** | |  | | 71.79 | | | 0.48 | | 12.81 | |  | |  | 0.08 | | 1.03 | | 1.68 | | 2.53 | | 4.13 | | 0.31 | | 1.57 | | 99.44 | | |  | 81.74 | | 4.65 | | 7.48 | | 2354.00 | | | 26.27 | | | 29.17 | | | 991.00 | | 7.00 | | 11.25 | | 9.54 | | 58.84 | | 18.43 |  | | |
| **YL06** | |  | | 73.04 | | | 0.34 | | 12.73 | |  | |  | 0.06 | | 0.71 | | 0.93 | | 3.34 | | 4.03 | | 0.20 | | 1.09 | | 99.12 | | |  | 62.77 | | 3.55 | | 5.95 | | 1733.00 | | | 21.34 | | | 21.37 | | | 991.00 | | 5.78 | | 7.92 | | 2.14 | | 30.11 | | 14.95 |  | | |
| **YL09** | | **431** | | 70.96 | | | 0.57 | | 13.46 | |  | |  | 0.06 | | 1.02 | | 2.15 | | 2.77 | | 3.80 | | 0.20 | | 0.64 | | 99.53 | | |  | 105.19 | | 2.69 | | 9.05 | | 3108.00 | | | 24.30 | | | 50.95 | | | 974.00 | | 8.62 | | 22.14 | | 12.73 | | 65.57 | | 18.06 |  | | |
| **YL10** | | **432** | | 67.40 | | | 0.77 | | 14.61 | |  | |  | 0.07 | | 1.39 | | 3.01 | | 3.28 | | 3.24 | | 0.24 | | 0.82 | | 99.84 | | |  | 26.82 | | 3.07 | | 11.99 | | 4289.00 | | | 36.84 | | | 44.73 | | | 1252.00 | | 12.24 | | 19.77 | | 16.70 | | 80.09 | | 19.76 |  | | |
| **Yu et al., 2019** | | **D7-1** | | **Biotite gneiss** | |  | | 65.29 | | | 0.72 | | 15.24 | |  | |  | 0.10 | | 2.05 | | 3.28 | | 2.41 | | 3.17 | | 0.02 | | 1.91 | | 99.77 | | |  |  | |  | | 15.32 | |  | | | 82.19 | | | 169.50 | | |  | | 12.05 | | 19.13 | | 22.69 | | 73.10 | | 21.80 |  | | |
| **D7-4** | |  | | 67.23 | | | 0.89 | | 14.33 | |  | |  | 0.09 | | 1.84 | | 3.01 | | 2.62 | | 3.13 | | 0.02 | | 0.62 | | 99.79 | | |  |  | |  | | 15.44 | |  | | | 84.40 | | | 171.10 | | |  | | 12.16 | | 19.10 | | 22.91 | | 75.40 | | 22.10 |  | | |
| **D7-5** | |  | | 68.48 | | | 0.62 | | 14.35 | |  | |  | 0.08 | | 1.98 | | 2.48 | | 2.38 | | 3.88 | | 0.01 | | 0.71 | | 99.93 | | |  |  | |  | | 15.77 | |  | | | 83.63 | | | 174.60 | | |  | | 11.85 | | 19.46 | | 22.46 | | 81.30 | | 22.10 |  | | |
| **Mig-1** | | **Migmatite** | |  | | 67.96 | | | 0.80 | | 13.62 | |  | |  | 0.09 | | 1.91 | | 2.71 | | 2.35 | | 3.75 | | 0.17 | | 0.66 | | 99.99 | | |  |  | |  | | 23.25 | |  | | | 128.80 | | | 266.70 | | |  | | 18.57 | | 29.83 | | 31.05 | | 115.50 | | 25.03 |  | | |
| **Mig-2** | |  | | 65.98 | | | 1.01 | | 14.14 | |  | |  | 0.11 | | 2.12 | | 3.14 | | 2.43 | | 2.93 | | 0.03 | | 0.99 | | 99.76 | | |  |  | |  | | 19.14 | |  | | | 110.90 | | |  | | |  | | 65.86 | | 114.00 | | 46.02 | | 95.89 | |  |  | | |
| **Liu et al., 2021b** | | **17GZ08-1** | | **Biotite granodiorites** | | **441.7** | | 69.42 | | | 0.49 | | 14.70 | |  | |  | 0.07 | | 1.03 | | 2.43 | | 3.38 | | 2.76 | | 0.09 | | 1.13 | | 99.56 | | | 33.40 |  | |  | | 11.40 | |  | | | 54.40 | | | 10.30 | | |  | |  | | 5.54 | |  | |  | | 23.00 |  | | |
| **17GZ08-3** | |  | | 67.77 | | | 0.67 | | 14.64 | |  | |  | 0.10 | | 1.52 | | 3.30 | | 3.08 | | 1.72 | | 0.12 | | 1.52 | | 99.78 | | | 36.00 |  | |  | | 16.20 | |  | | | 77.60 | | | 14.10 | | |  | |  | | 7.90 | |  | |  | | 19.40 |  | | |
| **Yu et al., 2018** | | **BX09-6** | | **Granite** | |  | | 69.70 | | | 0.41 | | 15.20 | | 3.54 | |  | 0.07 | | 0.95 | | 2.96 | | 3.52 | | 2.77 | | 0.12 | | 0.48 | | 99.70 | | | 0.35 |  | |  | | 7.53 | | 2373.00 | | | 54.70 | | | 167.00 | | |  | | 5.34 | | 7.62 | | 5.49 | | 63.00 | |  |  | | |
| **BX09-11** | | **442** | | 69.90 | | | 0.37 | | 15.00 | | 3.75 | |  | 0.07 | | 0.89 | | 3.32 | | 3.52 | | 2.09 | | 0.10 | | 0.68 | | 99.70 | | | 0.32 |  | |  | | 9.36 | | 1970.00 | | | 51.30 | | | 165.00 | | |  | | 6.33 | | 7.26 | | 33.60 | | 52.80 | |  |  | | |
| **BX09-13** | |  | | 70.90 | | | 0.28 | | 14.80 | | 3.01 | |  | 0.06 | | 0.71 | | 2.64 | | 3.25 | | 3.41 | | 0.11 | | 0.50 | | 99.70 | | | 0.32 |  | |  | | 8.08 | | 1549.00 | | | 46.20 | | | 171.00 | | |  | | 4.07 | | 6.71 | | 19.80 | | 43.70 | |  |  | | |
| **BX09-14** | |  | | 69.30 | | | 0.35 | | 15.40 | | 3.56 | |  | 0.07 | | 0.92 | | 3.39 | | 3.56 | | 2.34 | | 0.10 | | 0.73 | | 99.70 | | | 0.34 |  | |  | | 9.18 | | 2024.00 | | | 49.90 | | | 138.00 | | |  | | 5.38 | | 7.21 | | 19.60 | | 53.80 | |  |  | | |
| **BX09-7** | |  | | 72.20 | | | 0.29 | | 14.20 | | 3.01 | |  | 0.06 | | 0.61 | | 2.60 | | 3.16 | | 2.97 | | 0.07 | | 0.54 | | 99.60 | | | 0.29 |  | |  | | 8.79 | | 1613.00 | | | 42.60 | | | 177.00 | | |  | | 3.86 | | 5.26 | | 4.29 | | 46.80 | |  |  | | |
| **BX09-9** | |  | | 71.00 | | | 0.29 | | 14.80 | | 2.98 | |  | 0.06 | | 0.58 | | 2.64 | | 3.38 | | 3.23 | | 0.07 | | 0.62 | | 99.70 | | | 0.28 |  | |  | | 8.66 | | 1513.00 | | | 26.00 | | | 4.00 | | |  | | 49.90 | | 3.15 | | 18.90 | | 45.90 | |  |  | | |
| **BX09-10** | |  | | 71.80 | | | 0.27 | | 14.40 | | 2.79 | |  | 0.06 | | 0.56 | | 2.60 | | 3.22 | | 3.28 | | 0.06 | | 0.55 | | 99.70 | | | 0.29 |  | |  | | 8.27 | | 1508.00 | | | 37.50 | | | 164.00 | | |  | | 3.54 | | 4.86 | | 3.40 | | 44.10 | |  |  | | |
| **BX09-15** | |  | | 71.00 | | | 0.29 | | 14.60 | | 3.00 | |  | 0.06 | | 0.64 | | 2.74 | | 3.28 | | 3.17 | | 0.07 | | 0.80 | | 99.70 | | | 0.30 |  | |  | | 8.62 | | 1559.00 | | | 37.60 | | | 158.00 | | |  | | 3.74 | | 5.01 | | 29.20 | | 41.50 | |  |  | | |
| **BX09-8** | | **Gneissic granite** | |  | | 71.60 | | | 0.30 | | 14.50 | | 3.03 | |  | 0.07 | | 0.62 | | 2.68 | | 3.71 | | 2.61 | | 0.08 | | 0.43 | | 99.70 | | | 0.29 |  | |  | | 9.66 | | 1664.00 | | | 36.50 | | | 154.00 | | |  | | 3.83 | | 5.73 | | 4.15 | | 48.70 | |  |  | | |
| **BX09-12** | |  | | 72.10 | | | 0.25 | | 14.30 | | 2.84 | |  | 0.06 | | 0.50 | | 2.47 | | 3.22 | | 3.41 | | 0.07 | | 0.43 | | 99.70 | | | 0.26 |  | |  | | 7.34 | | 1327.00 | | | 39.60 | | | 185.00 | | |  | | 3.13 | | 4.87 | | 3.29 | | 43.60 | |  |  | | |
| **BX09-16** | |  | | 71.80 | | | 0.28 | | 14.50 | | 3.12 | |  | 0.06 | | 0.57 | | 2.46 | | 3.14 | | 3.22 | | 0.07 | | 0.57 | | 99.70 | | | 0.27 |  | |  | | 8.85 | | 1554.30 | | | 36.80 | | | 167.00 | | |  | | 3.51 | | 5.33 | | 3.61 | | 47.90 | |  |  | | |
| **BX09-2** | |  | | 60.40 | | | 0.67 | | 15.70 | | 8.43 | |  | 0.20 | | 2.65 | | 5.64 | | 3.33 | | 1.63 | | 0.13 | | 1.01 | | 99.80 | | | 0.39 |  | |  | | 22.80 | | 3665.00 | | | 159.00 | | | 9.70 | | |  | | 39.50 | | 9.57 | | 91.50 | | 99.50 | |  |  | | |
| **BX09-3** | |  | | 59.80 | | | 0.77 | | 16.20 | | 8.14 | |  | 0.17 | | 2.56 | | 5.84 | | 3.42 | | 1.63 | | 0.16 | | 1.12 | | 99.80 | | | 0.39 |  | |  | | 21.50 | | 4431.00 | | | 164.00 | | | 0.10 | | |  | | 41.40 | | 2.33 | | 131.00 | | 88.70 | |  |  | | |
| **BX09-4** | | **442** | | 59.70 | | | 0.81 | | 16.00 | | 8.46 | |  | 0.18 | | 2.51 | | 5.21 | | 3.35 | | 1.82 | | 0.16 | | 1.64 | | 99.80 | | | 0.37 |  | |  | | 21.50 | | 4526.00 | | | 173.00 | | | 1.14 | | |  | | 31.00 | | 2.89 | | 163.00 | | 93.00 | |  |  | | |
| **BX09-5** | |  | | 62.20 | | | 0.61 | | 15.40 | | 8.14 | |  | 0.19 | | 2.30 | | 4.98 | | 3.29 | | 1.57 | | 0.12 | | 1.01 | | 99. 8 | | | 0.36 |  | |  | | 19.20 | | 3395.00 | | | 140.00 | | | 116.00 | | |  | | 16.50 | | 11.30 | | 54.20 | | 98.50 | |  |  | | |
| **EP10-1** | | **Granodiorite** | | **429** | | 63.30 | | | 0.72 | | 15.30 | | 6.46 | |  | 0.11 | | 2.51 | | 4.99 | | 1.97 | | 2.71 | | 0.15 | | 1.41 | | 99.60 | | | 0.44 |  | |  | | 21.50 | | 4124.00 | | | 142.00 | | | 239.00 | | |  | | 15.50 | | 17.10 | | 24.20 | | 70.20 | |  |  | | |
| **EP10-2** | |  | | 65.20 | | | 0.60 | | 15.00 | | 5.75 | |  | 0.10 | | 2.19 | | 4.50 | | 2.36 | | 2.73 | | 0.13 | | 0.98 | | 99.60 | | | 0.43 |  | |  | | 18.90 | | 3386.00 | | | 122.00 | | | 220.00 | | |  | | 13.50 | | 12.90 | | 21.10 | | 62.30 | |  |  | | |
| **EP10-3** | |  | | 65.10 | | | 0.61 | | 15.00 | | 6.01 | |  | 0.10 | | 2.23 | | 4.82 | | 2.48 | | 2.12 | | 0.13 | | 1.02 | | 99.60 | | | 0.43 |  | |  | | 19.50 | | 3364.00 | | | 135.00 | | | 275.00 | | |  | | 13.90 | | 16.40 | | 19.40 | | 63.40 | |  |  | | |
| **EP10-4** | |  | | 62.40 | | | 0.81 | | 15.80 | | 6.37 | |  | 0.11 | | 2.34 | | 5.43 | | 2.31 | | 2.35 | | 0.15 | | 1.52 | | 99.60 | | | 0.42 |  | |  | | 18.60 | | 4580.00 | | | 137.00 | | | 169.00 | | |  | | 13.80 | | 16.20 | | 29.50 | | 83.30 | |  |  | | |
| **EP10-5** | |  | | 65.10 | | | 0.60 | | 15.10 | | 5.75 | |  | 0.10 | | 2.18 | | 4.58 | | 2.27 | | 2.77 | | 0.13 | | 1.07 | | 99.60 | | | 0.43 |  | |  | | 18.70 | | 3362.00 | | | 116.00 | | | 171.00 | | |  | | 13.20 | | 12.90 | | 23.10 | | 62.20 | |  |  | | |
| **EP10-6** | |  | | 65.10 | | | 0.62 | | 15.00 | | 5.98 | |  | 0.10 | | 2.25 | | 4.71 | | 2.53 | | 2.18 | | 0.13 | | 0.97 | | 99.60 | | | 0.43 |  | |  | | 19.40 | | 3462.00 | | | 126.00 | | | 202.00 | | |  | | 13.80 | | 13.70 | | 26.90 | | 80.30 | |  |  | | |
| **EP10-7** | |  | | 62.10 | | | 0.80 | | 15. 8 | | 6.65 | |  | 0.11 | | 2.52 | | 5.07 | | 2.21 | | 2.77 | | 0.16 | | 1.47 | | 99.60 | | | 0.43 |  | |  | | 20.80 | | 4507.00 | | | 137.00 | | | 176.00 | | |  | | 15.90 | | 16.80 | | 36.10 | | 70.40 | |  |  | | |
| **EP10-8** | |  | | 64.30 | | | 0.61 | | 15.00 | | 5.94 | |  | 0.09 | | 2.25 | | 4.67 | | 2.30 | | 2.34 | | 0.13 | | 2.09 | | 99.60 | | | 0.43 |  | |  | | 19.50 | | 3447.00 | | | 127.00 | | | 204.00 | | |  | | 14.30 | | 13.50 | | 24.90 | | 68.60 | |  |  | | |
| **EP10-10** | |  | | 63.50 | | | 0.71 | | 15.20 | | 6.56 | |  | 0.11 | | 2.54 | | 5.01 | | 2.09 | | 2.57 | | 0.15 | | 1.16 | | 99.60 | | | 0.44 |  | |  | | 22.10 | | 4035.00 | | | 136.00 | | | 204.00 | | |  | | 15.80 | | 16.30 | | 33.20 | | 65.20 | |  |  | | |
| **EP10-11** | |  | | 64.70 | | | 0.61 | | 14.80 | | 5.88 | |  | 0.10 | | 2.24 | | 4.58 | | 2.16 | | 2.78 | | 0.13 | | 1.54 | | 99.60 | | | 0.43 |  | |  | | 19.70 | | 3493.00 | | | 126.00 | | | 207.00 | | |  | | 13.40 | | 13.70 | | 21.30 | | 68.90 | |  |  | | |
| **EP10-12** | |  | | 64.80 | | | 0.62 | | 15.20 | | 5.76 | |  | 0.10 | | 2.21 | | 4.69 | | 2.30 | | 2.62 | | 0.13 | | 1.16 | | 99.60 | | | 0.43 |  | |  | | 19.70 | | 3479.00 | | | 124.00 | | | 185.00 | | |  | | 14.30 | | 13.60 | | 22.40 | | 67.30 | |  |  | | |
| **Huang et al., 2013** | | **TS10-1** | | **Bt granite** | | **436** | | 71.72 | | | 0.26 | | 14.45 | | 2.50 | |  | 0.04 | | 0.68 | | 2.60 | | 2.61 | | 4.15 | | 0.05 | | 0.54 | | 99.59 | | |  |  | |  | | 8.52 | | 1468.00 | | | 50.00 | | | 216.00 | | |  | | 6.00 | | 16.00 | | 6.83 | | 39.10 | |  |  | | |
| **TS10-2** | |  | | 72.86 | | | 0.22 | | 13.97 | | 2.08 | |  | 0.03 | | 0.55 | | 2.22 | | 2.64 | | 4.54 | | 0.04 | | 0.45 | | 99.59 | | |  |  | |  | | 7.82 | | 1223.00 | | | 47.00 | | | 224.00 | | |  | | 5.00 | | 10.00 | | 5.59 | | 27.20 | |  |  | | |
| **TS10-3** | |  | | 72.10 | | | 0.28 | | 13.89 | | 2.69 | |  | 0.05 | | 0.74 | | 2.52 | | 2.54 | | 4.10 | | 0.06 | | 0.63 | | 99.59 | | |  |  | |  | | 9.37 | | 1561.00 | | | 53.00 | | | 208.00 | | |  | | 7.00 | | 11.00 | | 6.68 | | 48.70 | |  |  | | |
| **TS10-4** | |  | | 72.35 | | | 0.27 | | 13.96 | | 2.55 | |  | 0.04 | | 0.70 | | 2.44 | | 2.49 | | 4.20 | | 0.06 | | 0.52 | | 99.58 | | |  |  | |  | | 9.19 | | 1516.00 | | | 56.00 | | | 224.00 | | |  | | 6.00 | | 10.00 | | 5.09 | | 39.70 | |  |  | | |
| **TS10-5** | |  | | 72.71 | | | 0.25 | | 13.80 | | 2.47 | |  | 0.04 | | 0.65 | | 2.43 | | 2.48 | | 4.07 | | 0.05 | | 0.63 | | 99.58 | | |  |  | |  | | 8.34 | | 1439.00 | | | 58.00 | | | 254.00 | | |  | | 6.00 | | 12.00 | | 17.70 | | 33.80 | |  |  | | |
| **TS10-25** | |  | | 72.66 | | | 0.26 | | 13.62 | | 2.73 | |  | 0.06 | | 0.71 | | 2.34 | | 2.52 | | 4.05 | | 0.05 | | 0.58 | | 99.59 | | |  |  | |  | | 9.11 | | 1475.00 | | | 61.00 | | | 246.00 | | |  | | 5.00 | | 9.00 | | 19.10 | | 30.60 | |  |  | | |
| **TS10-26** | |  | | 72.44 | | | 0.25 | | 13.96 | | 2.44 | |  | 0.04 | | 0.65 | | 2.31 | | 2.53 | | 4.32 | | 0.05 | | 0.57 | | 99.58 | | |  |  | |  | | 9.61 | | 1452.00 | | | 54.00 | | | 228.00 | | |  | | 6.00 | | 10.00 | | 4.78 | | 44.00 | |  |  | | |
| **TS10-27** | |  | | 71.09 | | | 0.33 | | 14.35 | | 2.92 | |  | 0.05 | | 0.84 | | 2.99 | | 2.65 | | 3.53 | | 0.06 | | 0.79 | | 99.60 | | |  |  | |  | | 10.00 | | 1802.00 | | | 64.00 | | | 245.00 | | |  | | 6.00 | | 12.00 | | 6.84 | | 44.80 | |  |  | | |
| **TS10-28** | |  | | 73.14 | | | 0.24 | | 13.76 | | 2.18 | |  | 0.03 | | 0.61 | | 2.35 | | 2.55 | | 4.15 | | 0.05 | | 0.53 | | 99.59 | | |  |  | |  | | 8.40 | | 1409.00 | | | 57.00 | | | 245.00 | | |  | | 5.00 | | 9.00 | | 5.69 | | 40.60 | |  |  | | |
| **TS10-29** | |  | | 70.85 | | | 0.37 | | 14.37 | | 3.11 | |  | 0.05 | | 0.90 | | 2.99 | | 2.69 | | 3.55 | | 0.06 | | 0.65 | | 99.60 | | |  |  | |  | | 11.10 | | 1896.00 | | | 63.00 | | | 157.00 | | |  | | 7.00 | | 10.00 | | 9.95 | | 52.40 | |  |  | | |
| **TS10-11** | | **Hbl-Bt granite** | |  | | 68.64 | | | 0.37 | | 15.36 | | 3.54 | |  | 0.06 | | 0.96 | | 3.49 | | 2.76 | | 3.60 | | 0.08 | | 0.73 | | 99.60 | | |  |  | |  | | 10.70 | | 2019.00 | | | 64.00 | | | 202.00 | | |  | | 7.00 | | 11.00 | | 7.77 | | 52.60 | |  |  | | |
| **TS10-12** | |  | | 69.26 | | | 0.37 | | 14.77 | | 3.56 | |  | 0.06 | | 0.94 | | 3.56 | | 2.64 | | 3.35 | | 0.08 | | 1.02 | | 99.60 | | |  |  | |  | | 10.90 | | 2023.00 | | | 66.00 | | | 215.00 | | |  | | 7.00 | | 11.00 | | 7.35 | | 43.40 | |  |  | | |
| **TS10-13** | | **436** | | 69.72 | | | 0.33 | | 14.71 | | 3.31 | |  | 0.05 | | 0.88 | | 3.50 | | 2.69 | | 3.25 | | 0.07 | | 1.10 | | 99.61 | | |  |  | |  | | 10.60 | | 1850.00 | | | 63.00 | | | 228.00 | | |  | | 7.00 | | 11.00 | | 7.18 | | 40.80 | |  |  | | |
| **TS10-35** | |  | | 68.70 | | | 0.35 | | 15.71 | | 3.34 | |  | 0.05 | | 0.88 | | 3.42 | | 2.81 | | 3.57 | | 0.08 | | 0.69 | | 99.60 | | |  |  | |  | | 12.00 | | 1824.00 | | | 58.00 | | | 152.00 | | |  | | 6.00 | | 8.00 | | 9.01 | | 40.50 | |  |  | | |
| **TS10-36** | |  | | 68.79 | | | 0.40 | | 14.90 | | 3.90 | |  | 0.07 | | 1.04 | | 3.28 | | 2.63 | | 3.84 | | 0.09 | | 0.65 | | 99.58 | | |  |  | |  | | 13.90 | | 2081.00 | | | 61.00 | | | 187.00 | | |  | | 7.00 | | 10.00 | | 12.00 | | 49.30 | |  |  | | |
| **TS10-37** | |  | | 69.08 | | | 0.37 | | 14.99 | | 3.51 | |  | 0.06 | | 0.94 | | 3.44 | | 2.67 | | 3.41 | | 0.08 | | 1.07 | | 99.61 | | |  |  | |  | | 12.30 | | 1898.00 | | | 52.00 | | | 123.00 | | |  | | 7.00 | | 10.00 | | 16.50 | | 59.00 | |  |  | | |
| **TS10-38** | |  | | 68.54 | | | 0.37 | | 15.30 | | 3.69 | |  | 0.06 | | 1.00 | | 3.59 | | 2.77 | | 3.44 | | 0.08 | | 0.74 | | 99.60 | | |  |  | |  | | 13.30 | | 1957.00 | | | 67.00 | | | 224.00 | | |  | | 7.00 | | 11.00 | | 9.65 | | 64.70 | |  |  | | |
| **TS10-39** | |  | | 67.87 | | | 0.40 | | 15.40 | | 3.92 | |  | 0.06 | | 1.07 | | 3.49 | | 2.76 | | 3.35 | | 0.09 | | 1.20 | | 99.61 | | |  |  | |  | | 13.90 | | 2099.00 | | | 70.00 | | | 191.00 | | |  | | 7.00 | | 10.00 | | 8.37 | | 43.30 | |  |  | | |
| **TS10-40** | |  | | 68.74 | | | 0.39 | | 14.94 | | 3.66 | |  | 0.06 | | 0.99 | | 3.58 | | 2.64 | | 3.39 | | 0.08 | | 1.12 | | 99.60 | | |  |  | |  | | 12.30 | | 2098.00 | | | 64.00 | | | 182.00 | | |  | | 7.00 | | 10.00 | | 14.80 | | 58.60 | |  |  | | |
| **TS10-48** | | **436** | | 69.18 | | | 0.35 | | 15.04 | | 3.44 | |  | 0.04 | | 0.88 | | 2.71 | | 2.94 | | 3.67 | | 0.08 | | 1.27 | | 99.62 | | |  |  | |  | | 11.50 | | 1858.00 | | | 59.00 | | | 141.00 | | |  | | 5.00 | | 9.00 | | 18.10 | | 45.70 | |  |  | | |
| **TS10-49** | |  | | 69.15 | | | 0.35 | | 15.02 | | 3.26 | |  | 0.05 | | 0.84 | | 2.52 | | 3.22 | | 3.91 | | 0.08 | | 1.24 | | 99.64 | | |  |  | |  | | 12.00 | | 1871.00 | | | 64.00 | | | 198.00 | | |  | | 5.00 | | 8.00 | | 10.20 | | 47.90 | |  |  | | |
| **TS10-50** | |  | | 68.89 | | | 0.34 | | 15.60 | | 3.31 | |  | 0.05 | | 0.85 | | 3.48 | | 2.91 | | 3.45 | | 0.07 | | 0.65 | | 99.61 | | |  |  | |  | | 12.40 | | 1788.00 | | | 65.00 | | | 226.00 | | |  | | 6.00 | | 8.00 | | 18.90 | | 51.00 | |  |  | | |
| **TS10-51** | |  | | 70.71 | | | 0.29 | | 14.92 | | 2.86 | |  | 0.04 | | 0.62 | | 3.16 | | 2.72 | | 3.36 | | 0.06 | | 0.85 | | 99.60 | | |  |  | |  | | 10.30 | | 1524.00 | | | 47.00 | | | 179.00 | | |  | | 5.00 | | 8.00 | | 14.00 | | 28.50 | |  |  | | |
| **TS10-20** | | **436** | | 72.57 | | | 0.22 | | 13.51 | | 2.20 | |  | 0.06 | | 0.48 | | 2.19 | | 3.17 | | 4.22 | | 0.05 | | 1.00 | | 99.65 | | |  |  | |  | | 6.97 | | 1295.00 | | | 44.00 | | | 201.00 | | |  | | 4.00 | | 8.00 | | 4.98 | | 32.40 | |  |  | | |
| **TS10-21** | |  | | 70.80 | | | 0.28 | | 14.52 | | 2.75 | |  | 0.05 | | 0.64 | | 2.65 | | 3.06 | | 3.75 | | 0.06 | | 1.06 | | 99.63 | | |  |  | |  | | 9.55 | | 1547.00 | | | 54.00 | | | 203.00 | | |  | | 4.00 | | 8.00 | | 12.90 | | 37.70 | |  |  | | |
| **TS10-23** | |  | | 69.36 | | | 0.34 | | 15.36 | | 3.17 | |  | 0.03 | | 0.81 | | 2.44 | | 3.03 | | 3.79 | | 0.07 | | 1.24 | | 99.65 | | |  |  | |  | | 10.60 | | 1875.00 | | | 60.00 | | | 170.00 | | |  | | 5.00 | | 9.00 | | 7.68 | | 48.40 | |  |  | | |
| **TS10-42** | |  | | 74.90 | | | 0.21 | | 12.97 | | 1.80 | |  | 0.04 | | 0.41 | | 1.07 | | 3.30 | | 4.08 | | 0.05 | | 0.82 | | 99.64 | | |  |  | |  | | 8.72 | | 1107.00 | | | 39.00 | | | 198.00 | | |  | | 3.00 | | 6.00 | | 9.88 | | 21.10 | |  |  | | |
| **TS10-43** | |  | | 73.35 | | | 0.20 | | 13.81 | | 1.91 | |  | 0.04 | | 0.47 | | 1.71 | | 2.83 | | 4.36 | | 0.05 | | 0.89 | | 99.60 | | |  |  | |  | | 8.71 | | 1058.00 | | | 41.00 | | | 178.00 | | |  | | 3.00 | | 11.00 | | 13.20 | | 37.40 | |  |  | | |
| **TS10-14** | | **Granodiorite** | |  | | 62.35 | | | 0.77 | | 15.69 | | 6.74 | |  | 0.10 | | 2.17 | | 4.88 | | 2.29 | | 2.42 | | 0.17 | | 2.04 | | 99.62 | | |  |  | |  | | 19.70 | | 4415.00 | | | 128.00 | | | 171.00 | | |  | | 16.00 | | 15.00 | | 18.80 | | 70.00 | |  |  | | |
| **TS10-15** | |  | | 62.37 | | | 0.79 | | 16.31 | | 6.85 | |  | 0.10 | | 2.21 | | 5.17 | | 2.34 | | 2.26 | | 0.17 | | 1.00 | | 99.58 | | |  |  | |  | | 18.30 | | 4458.00 | | | 126.00 | | | 169.00 | | |  | | 16.00 | | 15.00 | | 20.90 | | 76.70 | |  |  | | |
| **TS10-16** | |  | | 61.49 | | | 0.85 | | 15.99 | | 7.38 | |  | 0.11 | | 2.39 | | 5.45 | | 2.26 | | 2.66 | | 0.19 | | 0.79 | | 99.57 | | |  |  | |  | | 22.30 | | 4857.00 | | | 139.00 | | | 172.00 | | |  | | 16.00 | | 16.00 | | 26.50 | | 79.50 | |  |  | | |
| **TS10-17** | |  | | 62.20 | | | 0.85 | | 15.59 | | 7.24 | |  | 0.11 | | 2.37 | | 5.22 | | 2.14 | | 2.73 | | 0.19 | | 0.94 | | 99.56 | | |  |  | |  | | 21.60 | | 4850.00 | | | 147.00 | | | 199.00 | | |  | | 16.00 | | 16.00 | | 15.70 | | 82.10 | |  |  | | |
| **TS10-18** | |  | | 61.94 | | | 0.82 | | 16.13 | | 7.13 | |  | 0.10 | | 2.31 | | 5.38 | | 2.29 | | 2.42 | | 0.18 | | 0.87 | | 99.58 | | |  |  | |  | | 21.80 | | 4659.00 | | | 142.00 | | | 195.00 | | |  | | 16.00 | | 15.00 | | 17.00 | | 80.10 | |  |  | | |
| **TS10-19** | |  | | 63.16 | | | 0.74 | | 15.93 | | 6.38 | |  | 0.09 | | 2.05 | | 5.26 | | 2.31 | | 2.37 | | 0.15 | | 1.12 | | 99.58 | | |  |  | |  | | 18.40 | | 4283.00 | | | 126.00 | | | 217.00 | | |  | | 14.00 | | 16.00 | | 20.50 | | 74.30 | |  |  | | |
| **TS10-47** | |  | | 62.58 | | | 0.75 | | 16.17 | | 6.47 | |  | 0.09 | | 2.12 | | 5.09 | | 2.38 | | 2.65 | | 0.17 | | 1.11 | | 99.58 | | |  |  | |  | | 19.30 | | 4086.00 | | | 120.00 | | | 133.00 | | |  | | 14.00 | | 14.00 | | 21.70 | | 83.20 | |  |  | | |
| **TS10-53** | |  | | 62.45 | | | 0.76 | | 16.03 | | 6.74 | |  | 0.10 | | 2.22 | | 5.46 | | 2.29 | | 2.37 | | 0.17 | | 1.00 | | 99.57 | | |  |  | |  | | 22.50 | | 4127.00 | | | 123.00 | | | 124.00 | | |  | | 15.00 | | 15.00 | | 24.20 | | 79.40 | |  |  | | |
| **Feng et al., 2014** | | **HT-1** | | **Huitong granite** | |  | | 73.96 | | | 0.28 | | 12.72 | | 1.53 | |  | 0.03 | | 0.26 | | 0.14 | | 1.64 | | 5.94 | | 0.11 | | 2.00 | | 99.83 | | |  | 38.76 | | 2.41 | | 4.35 | | 1725.00 | | | 21.06 | | | 1404.00 | | | 281.00 | | 10.60 | | 971.90 | | 18.61 | | 144.40 | | 20.41 |  | | |
| **HT-2** | |  | | 71.75 | | | 0.37 | | 14.12 | | 1.76 | |  | 0.05 | | 0.51 | | 0.24 | | 2.51 | | 4.45 | | 0.16 | | 2.69 | | 99.89 | | |  | 76.59 | | 5.69 | | 12.30 | | 2286.00 | | | 30.60 | | | 1095.00 | | | 483.70 | | 9.49 | | 629.20 | | 15.68 | | 165.50 | | 22.05 |  | | |
| **HT-5** | |  | | 70.70 | | | 0.34 | | 14.62 | | 2.47 | |  | 0.04 | | 0.59 | | 0.24 | | 2.45 | | 6.48 | | 0.11 | | 1.68 | | 99.92 | | |  | 44.52 | | 2.18 | | 5.89 | | 2144.00 | | | 27.23 | | | 1823.00 | | | 388.70 | | 12.70 | | 1178.00 | | 21.82 | | 536.70 | | 21.60 |  | | |
| **HT-7** | |  | | 71.76 | | | 0.27 | | 14.48 | | 0.66 | |  | 0.04 | | 0.36 | | 0.25 | | 3.01 | | 6.38 | | 0.14 | | 1.19 | | 99.97 | | |  | 34.69 | | 5.00 | | 4.61 | | 1637.00 | | | 19.51 | | | 802.20 | | | 351.50 | | 6.49 | | 523.70 | | 11.24 | | 117.50 | | 20.95 |  | | |
| **HT-8** | |  | | 70.70 | | | 0.54 | | 14.34 | | 2.74 | |  | 0.05 | | 0.79 | | 0.84 | | 2.75 | | 5.34 | | 0.25 | | 1.23 | | 99.89 | | |  | 149.22 | | 3.94 | | 6.70 | | 3031.00 | | | 44.89 | | | 1534.00 | | | 432.90 | | 12.70 | | 1009.00 | | 21.39 | | 404.60 | | 21.35 |  | | |
| **HT-9a** | | **415** | | 67.23 | | | 0.71 | | 14.77 | | 2.17 | |  | 0.08 | | 1.05 | | 1.85 | | 2.95 | | 5.33 | | 0.26 | | 1.42 | | 99.68 | | |  | 55.07 | | 3.37 | | 9.82 | | 4568.00 | | | 65.10 | | | 1230.00 | | | 695.80 | | 14.40 | | 794.40 | | 22.33 | | 145.00 | | 23.33 |  | | |
| **HT-10** | |  | | 68.92 | | | 0.65 | | 14.27 | | 1.87 | |  | 0.07 | | 0.99 | | 1.15 | | 2.75 | | 4.77 | | 0.30 | | 1.87 | | 99.81 | | |  | 67.96 | | 4.77 | | 10.20 | | 4358.00 | | | 60.38 | | | 429.60 | | | 608.30 | | 10.10 | | 275.40 | | 10.73 | | 113.00 | | 25.98 |  | | |
| **EP-1** | | **Epo granite** | |  | | 66.96 | | | 0.59 | | 16.09 | | 3.57 | |  | 0.06 | | 0.81 | | 0.16 | | 2.34 | | 5.64 | | 0.18 | | 3.63 | | 100.03 | | |  | 33.54 | | 2.30 | | 9.02 | | 3559.00 | | | 38.74 | | | 17.68 | | | 368.00 | | 6.66 | | 1.98 | | 4.33 | | 164.10 | | 21.70 |  | | |
| **EP-2a** | | **414** | | 66.94 | | | 0.44 | | 16.37 | | 3.16 | |  | 0.05 | | 0.74 | | 1.66 | | 4.04 | | 4.81 | | 0.20 | | 1.68 | | 100.11 | | |  | 33.06 | | 3.88 | | 6.34 | | 2730.00 | | | 29.19 | | | 21.45 | | | 364.50 | | 5.59 | | 5.37 | | 3.97 | | 107.20 | | 21.67 |  | | |
| **EP-4** | | **445** | | 69.89 | | | 0.47 | | 12.97 | | 3.10 | |  | 0.06 | | 0.88 | | 2.33 | | 3.22 | | 4.56 | | 0.20 | | 2.06 | | 99.74 | | |  | 65.70 | | 1.97 | | 6.94 | | 3269.00 | | | 38.83 | | | 107.90 | | | 376.80 | | 6.82 | | 73.30 | | 13.32 | | 56.68 | | 19.61 |  | | |
| **EP-7** | |  | | 71.00 | | | 0.38 | | 14.35 | | 2.68 | |  | 0.05 | | 0.48 | | 1.04 | | 2.98 | | 5.66 | | 0.18 | | 0.61 | | 99.57 | | |  | 75.87 | | 3.06 | | 4.98 | | 2284.00 | | | 20.85 | | | 23.29 | | | 554.00 | | 4.48 | | 3.07 | | 6.86 | | 59.46 | | 21.21 |  | | |
| **EP-9** | |  | | 69.80 | | | 0.45 | | 14.45 | | 3.13 | |  | 0.05 | | 0.60 | | 1.54 | | 2.98 | | 5.50 | | 0.20 | | 0.61 | | 99.51 | | |  | 69.79 | | 2.12 | | 6.05 | | 2964.00 | | | 25.88 | | | 59.86 | | | 634.00 | | 5.97 | | 5.12 | | 9.67 | | 59.08 | | 20.96 |  | | |
| **EP-10** | |  | | 71.00 | | | 0.42 | | 14.40 | | 2.83 | |  | 0.04 | | 0.48 | | 0.47 | | 2.59 | | 5.95 | | 0.11 | | 1.14 | | 99.59 | | |  | 63.77 | | 2.94 | | 5.42 | | 2568.00 | | | 22.73 | | | 24.27 | | | 485.00 | | 6.25 | | 4.98 | | 5.46 | | 64.85 | | 20.62 |  | | |
| **HT-9b** | | **MME** | | **415** | | 64.13 | | | 1.22 | | 14.79 | | 6.92 | |  | 0.12 | | 2.03 | | 3.12 | | 3.50 | | 2.48 | | 0.38 | | 1.21 | | 99.89 | | |  | 106.60 | | 4.04 | | 17.10 | | 8247.00 | | | 139.20 | | | 3168.00 | | | 1266.00 | | 30.60 | | 1923.00 | | 50.13 | | 237.40 | | 28.84 |  | | |
| **Kong et al., 2021** | | **WYS-1** | | **Wanyangshan granitoid** | | **445** | | 75.00 | | | 0.04 | | 14.10 | |  | |  | 0.03 | | 0.25 | | 0.29 | | 3.32 | | 4.21 | | 0.16 | | 1.13 | | 99.51 | | |  |  | |  | |  | |  | | |  | | |  | | |  | |  | |  | |  | |  | | 17.40 |  | | |
| **WYS-2** | | 74.40 | | | 0.04 | | 14.30 | |  | |  | 0.02 | | 0.31 | | 0.25 | | 3.01 | | 4.26 | | 0.14 | | 1.40 | | 99.20 | | |  |  | |  | |  | |  | |  | | |  | | |  | | |  | |  | |  | |  | | 18.20 |  | |
| **WYS-3** | | 75.00 | | | 0.05 | | 14.20 | |  | |  | 0.02 | | 0.31 | | 0.24 | | 3.09 | | 4.18 | | 0.13 | | 1.36 | | 99.64 | | |  |  | |  | |  | |  | |  | | |  | | |  | | |  | |  | |  | |  | | 17.50 |  | |
| **WYS-4** | | 72.20 | | | 0.21 | | 15.40 | |  | |  | 0.04 | | 0.65 | | 0.42 | | 4.76 | | 4.33 | | 0.13 | | 0.33 | | 99.73 | | |  |  | |  | |  | |  | |  | | |  | | |  | | |  | |  | |  | |  | | 22.90 |  | |
| **WYS-6** | | 73.50 | | | 0.15 | | 14.60 | |  | |  | 0.03 | | 0.43 | | 0.33 | | 3.89 | | 4.24 | | 0.15 | | 0.69 | | 99.12 | | |  |  | |  | |  | |  | |  | | |  | | |  | | |  | |  | |  | |  | | 19.60 |  | |
| **WYS-7** | | 75.70 | | | 0.11 | | 13.80 | |  | |  | 0.02 | | 0.24 | | 0.21 | | 3.11 | | 4.32 | | 0.14 | | 0.95 | | 99.35 | | |  |  | |  | |  | |  | |  | | |  | | |  | | |  | |  | |  | |  | | 19.80 |  | |
| **Dang et al., 2018** | | **YP-1** | | **Yupo Granodiorite** | | **442.5** | | 63.73 | | | 0.35 | | 16.57 | | 0.34 | | 4.08 | 0.13 | | 2.54 | | 4.26 | | 2.66 | | 3.55 | | 0.11 | | 2.21 | | 100.53 | | |  | 18.00 | | 2.10 | | 15.00 | |  | | 105.00 | | | 24.60 | | |  | | | 10.30 | | 5.97 | | 82.70 | | 69.30 | | 16.00 |  | |
| **YP-2** | | 62.97 | | | 0.36 | | 16.29 | | 0.05 | | 4.71 | 0.11 | | 2.57 | | 4.61 | | 2.58 | | 2.92 | | 0.11 | | 2.51 | | 99.79 | | |  | 22.50 | | 1.77 | | 16.20 | |  | | 109.00 | | | 56.10 | | |  | | | 11.20 | | 15.80 | | 104.00 | | 77.30 | | 16.50 |  | |
| **YP-3** | | 63.42 | | | 0.32 | | 15.53 | | 0.53 | | 3.74 | 0.10 | | 2.21 | | 3.04 | | 2.50 | | 3.20 | | 0.08 | | 4.85 | | 99.52 | | |  | 19.10 | | 1.77 | | 13.70 | |  | | 90.20 | | | 30.10 | | |  | | | 9.05 | | 8.49 | | 31.90 | | 56.60 | | 14.70 |  | |
| **YP-4** | | 63.25 | | | 0.33 | | 15.28 | | 0.05 | | 3.96 | 0.11 | | 2.33 | | 3.39 | | 2.77 | | 2.95 | | 0.09 | | 5.32 | | 99.83 | | |  | 15.50 | | 1.93 | | 13.60 | |  | | 90.10 | | | 24.50 | | |  | | | 8.00 | | 6.23 | | 36.00 | | 45.30 | | 15.30 |  | |
| **YP-5** | | 63.78 | | | 0.33 | | 15.93 | | 0.10 | | 4.20 | 0.11 | | 2.42 | | 5.17 | | 2.83 | | 1.94 | | 0.12 | | 3.09 | | 100.02 | | |  | 21.40 | | 1.61 | | 15.00 | |  | | 97.70 | | | 26.20 | | |  | | | 9.97 | | 6.93 | | 35.40 | | 54.80 | | 15.20 |  | |
|  | **YP-6** | |  | |  | | 64.28 | | 0.32 | 15.99 | | 0.56 | | 3.67 | | 0.10 | | | 2.26 | | 3.84 | | 2.76 | | 2.57 | | 0.10 | | 2.88 | | 99.33 | |  | 20.00 | | | 1.73 | | 13.80 | |  | | 91.20 | | | 23.90 | | |  | | | 8.42 | | 5.85 | | 48.00 | | 59.90 | | 15.60 | | |  | |

| **Se** | **Rb** | **Sr** | **Y** | **Zr** | **Nb** | **Mo** | **Sn** | **Cs** | **Ba** | **La** | **Ce** | **Pr** | **Nd** | **Sm** | **Eu** | **Gd** | **Tb** | **Dy** | **Ho** | **Er** | **Tm** | **Yb** | **Lu** | **Hf** | **Ta** | **Pb** | **Th** | **U** | **87Sr/86Sr** | **εNd(t)** |
| --- | --- | --- | --- | --- | --- | --- | --- | --- | --- | --- | --- | --- | --- | --- | --- | --- | --- | --- | --- | --- | --- | --- | --- | --- | --- | --- | --- | --- | --- | --- |
| 0.625 | 169 | 134 | 17.6 | 116 | 5.72 | 0.980 | 1.20 | 8.18 | 946 | 26.4 | 45.4 | 4.49 | 14.3 | 2.75 | 0.619 | 2.58 | 0.457 | 3.02 | 0.618 | 1.82 | 0.292 | 1.98 | 0.314 | 3.21 | 0.598 | 9.58 | 17.9 | 3.34 |  |  |
| 0.754 | 116 | 132 | 21.9 | 134 | 7.44 | 5.45 | 2.24 | 7.17 | 881 | 29.7 | 55.6 | 5.68 | 18.4 | 3.58 | 0.720 | 3.28 | 0.563 | 3.69 | 0.750 | 2.21 | 0.352 | 2.37 | 0.380 | 3.81 | 0.828 | 15.7 | 22.7 | 4.98 |  | -6.37 |
| 0.572 | 111 | 137 | 15.8 | 159 | 8.57 | 0.640 | 2.54 | 4.87 | 561 | 26.6 | 48.3 | 4.57 | 15.9 | 2.97 | 0.676 | 2.74 | 0.409 | 2.55 | 0.507 | 1.48 | 0.239 | 1.67 | 0.276 | 4.16 | 0.836 | 17.5 | 21.6 | 4.36 |  | -6.76 |
| 0.520 | 134 | 114 | 19.8 | 134 | 7.86 | 0.253 | 2.32 | 3.67 | 615 | 31.8 | 54.8 | 5.28 | 16.7 | 3.04 | 0.641 | 2.92 | 0.479 | 3.04 | 0.638 | 1.90 | 0.297 | 2.06 | 0.330 | 3.83 | 0.942 | 22.9 | 22.5 | 5.13 |  |  |
| 0.72 | 133 | 111 | 26.1 | 145 | 8.49 | 0.32 | 2.53 | 6.77 | 617 | 30.4 | 55.0 | 5.75 | 18.9 | 3.74 | 0.68 | 3.79 | 0.63 | 4.08 | 0.86 | 2.54 | 0.39 | 2.72 | 0.42 | 4.15 | 0.88 | 23.0 | 22.8 | 4.66 |  |  |
| 0.69 | 123 | 118 | 21.0 | 125 | 7.62 | 0.28 | 1.93 | 4.48 | 635 | 36.2 | 62.8 | 6.18 | 19.2 | 3.40 | 0.69 | 3.23 | 0.52 | 3.23 | 0.68 | 2.02 | 0.32 | 2.17 | 0.34 | 3.63 | 0.87 | 21.3 | 21.7 | 4.13 |  |  |
| 0.65 | 113 | 112 | 21.6 | 121 | 7.31 | 0.26 | 2.27 | 4.12 | 559 | 32.0 | 56.3 | 5.71 | 18.1 | 3.35 | 0.67 | 3.26 | 0.53 | 3.38 | 0.71 | 2.10 | 0.33 | 2.26 | 0.36 | 3.51 | 0.81 | 23.1 | 20.5 | 3.96 |  |  |
| 0.63 | 119 | 116 | 20.9 | 127 | 8.15 | 0.16 | 2.45 | 4.28 | 505 | 26.3 | 47.4 | 4.65 | 16.2 | 3.17 | 0.65 | 3.07 | 0.51 | 3.30 | 0.69 | 2.07 | 0.32 | 2.22 | 0.36 | 3.65 | 0.93 | 21.0 | 21.5 | 4.87 |  |  |
| 0.58 | 139 | 107 | 23.0 | 130 | 6.33 | 0.65 | 1.80 | 9.02 | 432 | 22.6 | 41.3 | 4.13 | 14.8 | 3.14 | 0.77 | 3.19 | 0.53 | 3.65 | 0.74 | 2.20 | 0.36 | 2.44 | 0.39 | 3.72 | 0.76 | 31.5 | 16.1 | 4.90 |  |  |
| 0.59 | 103 | 129 | 18.9 | 142 | 7.13 | 0.42 | 1.77 | 6.05 | 506 | 28.5 | 48.6 | 4.61 | 15.3 | 2.88 | 0.65 | 2.81 | 0.47 | 3.04 | 0.64 | 1.93 | 0.30 | 2.05 | 0.33 | 3.93 | 0.78 | 16.6 | 22.8 | 3.98 |  |  |
| 0.61 | 82.8 | 158 | 18.6 | 130 | 6.91 | 0.19 | 1.61 | 5.08 | 520 | 21.7 | 38.9 | 3.78 | 13.4 | 2.69 | 0.65 | 2.72 | 0.45 | 2.94 | 0.62 | 1.88 | 0.29 | 2.01 | 0.32 | 3.59 | 0.69 | 16.0 | 16.6 | 2.96 |  | -5.4 |
| 0.48 | 73.4 | 138 | 17.3 | 125 | 7.23 | 0.36 | 1.65 | 4.06 | 493 | 22.0 | 39.0 | 3.62 | 12.8 | 2.58 | 0.67 | 2.66 | 0.44 | 2.82 | 0.60 | 1.76 | 0.27 | 1.85 | 0.29 | 3.53 | 0.72 | 15.4 | 17.6 | 2.86 |  | -6.71 |
| 0.56 | 154 | 188 | 17.5 | 148 | 6.61 | 0.11 | 2.72 | 12.4 | 814 | 33.6 | 57.9 | 5.65 | 17.0 | 2.92 | 0.63 | 2.66 | 0.44 | 2.77 | 0.59 | 1.78 | 0.28 | 1.97 | 0.32 | 4.17 | 0.78 | 22.5 | 20.7 | 4.36 |  |  |
| 0.39 | 146 | 155 | 18.4 | 145 | 7.22 | 1.36 | 3.02 | 6.37 | 688 | 23.4 | 39.8 | 3.84 | 13.4 | 2.68 | 0.66 | 2.70 | 0.44 | 2.85 | 0.59 | 1.82 | 0.28 | 1.93 | 0.31 | 4.17 | 0.84 | 35.4 | 18.3 | 4.36 |  |  |
| 0.70 | 169 | 136 | 23.7 | 151 | 8.13 | 0.10 | 2.23 | 10.9 | 499 | 50.3 | 85.7 | 8.11 | 23.9 | 3.91 | 0.74 | 3.58 | 0.57 | 3.61 | 0.74 | 2.21 | 0.37 | 2.49 | 0.40 | 4.36 | 0.97 | 24.7 | 27.8 | 4.56 |  | -5.9 |
| 0.54 | 125 | 189 | 14.9 | 110 | 9.70 | 0.74 | 1.86 | 4.42 | 773 | 22.1 | 36.5 | 3.97 | 13.5 | 2.48 | 0.71 | 2.32 | 0.37 | 2.36 | 0.50 | 1.45 | 0.22 | 1.44 | 0.23 | 3.22 | 1.10 | 21.2 | 23.3 | 6.09 |  |  |
| 0.95 | 161 | 114 | 29.6 | 118 | 7.24 | 2.08 | 2.37 | 3.64 | 913 | 29.0 | 57.0 | 6.37 | 21.8 | 4.76 | 0.72 | 4.39 | 0.80 | 5.27 | 1.07 | 3.05 | 0.46 | 3.01 | 0.45 | 3.74 | 0.81 | 38.1 | 24.6 | 4.83 |  | -9.11 |
| 0.91 | 200 | 97.7 | 31.4 | 102 | 9.96 | 0.23 | 4.55 | 6.03 | 635 | 21.0 | 41.0 | 4.39 | 16.1 | 3.94 | 0.59 | 4.17 | 0.78 | 5.20 | 1.07 | 3.10 | 0.48 | 3.15 | 0.46 | 3.47 | 1.60 | 41.5 | 19.1 | 5.75 |  |  |
| 0.38 | 179 | 83.7 | 20.9 | 101 | 6.87 | 0.33 | 3.19 | 6.25 | 591 | 22.0 | 40.7 | 4.03 | 13.8 | 2.93 | 0.49 | 2.91 | 0.50 | 3.23 | 0.67 | 2.02 | 0.33 | 2.28 | 0.36 | 3.55 | 1.26 | 41.4 | 23.3 | 8.59 |  | -8.59 |
| 1.06 | 200 | 86.3 | 37.8 | 102 | 8.06 | 2.58 | 3.68 | 3.56 | 832 | 24.5 | 48.4 | 5.65 | 19.8 | 4.84 | 0.70 | 5.18 | 0.93 | 6.18 | 1.27 | 3.63 | 0.54 | 3.43 | 0.50 | 3.47 | 1.04 | 45.9 | 18.1 | 6.15 |  |  |
| 0.78 | 238 | 135 | 19.4 | 101 | 4.35 | 0.72 | 1.82 | 12.0 | 541 | 15.9 | 29.8 | 3.07 | 11.6 | 2.55 | 0.66 | 2.65 | 0.46 | 3.12 | 0.64 | 1.92 | 0.31 | 2.06 | 0.32 | 2.75 | 0.41 | 11.7 | 10.5 | 2.39 |  | -4.36 |
| 0.80 | 104 | 145 | 31.8 | 93.1 | 8.71 | 0.29 | 2.60 | 6.90 | 533 | 13.4 | 31.7 | 3.99 | 17.0 | 4.11 | 0.93 | 4.43 | 0.75 | 5.01 | 1.07 | 3.26 | 0.51 | 3.48 | 0.55 | 2.72 | 0.73 | 14.4 | 6.15 | 1.61 |  |  |
| 0.80 | 89.1 | 154 | 32.2 | 88.3 | 8.21 | 0.29 | 3.02 | 5.01 | 320 | 17.8 | 43.7 | 5.55 | 20.9 | 4.49 | 1.15 | 4.53 | 0.74 | 4.86 | 1.04 | 3.18 | 0.52 | 3.68 | 0.59 | 2.76 | 0.84 | 30.4 | 8.47 | 1.92 |  | -6.56 |
| 0.81 | 103 | 144 | 36.4 | 178 | 11.7 | 0.60 | 2.62 | 4.49 | 640 | 34.9 | 64.9 | 7.16 | 25.1 | 5.46 | 0.96 | 5.68 | 0.95 | 6.19 | 1.28 | 3.74 | 0.56 | 3.66 | 0.56 | 4.79 | 0.80 | 11.2 | 14.1 | 1.67 |  |  |
| 1.10 | 90.6 | 153 | 43.0 | 95.9 | 10.3 | 0.39 | 3.16 | 4.17 | 616 | 15.2 | 40.6 | 5.74 | 23.0 | 5.64 | 1.16 | 6.05 | 1.04 | 6.94 | 1.47 | 4.41 | 0.69 | 4.69 | 0.71 | 2.85 | 0.69 | 12.2 | 2.75 | 0.797 |  | -5.71 |
| 0.80 | 100 | 156 | 36.3 | 98.3 | 9.90 | 0.45 | 2.88 | 4.61 | 601 | 14.0 | 35.5 | 4.67 | 19.8 | 4.81 | 1.05 | 5.14 | 0.88 | 5.91 | 1.24 | 3.70 | 0.58 | 3.90 | 0.60 | 2.86 | 0.65 | 12.6 | 2.76 | 0.797 |  |  |
|  | 128 | 280 | 14.2 | 107 | 6.68 |  |  |  | 704 | 30 | 52.1 | 5.24 | 19 | 3.74 | 0.93 | 3.3 | 0.51 | 3.02 | 0.6 | 1.64 | 0.26 | 1.72 | 0.26 | 3.73 | 0.97 |  | 15.7 | 5.46 | 0.71953 | -7.03 |
|  | 176 | 245 | 12.5 | 94 | 6.98 |  |  |  | 588 | 30.9 | 50.2 | 4.68 | 16.1 | 3.06 | 0.74 | 2.75 | 0.43 | 2.53 | 0.51 | 1.4 | 0.24 | 1.59 | 0.24 | 3.84 | 1.94 |  | 20.8 | 11.7 | 0.72341 | -6.92 |
|  | 149 | 304 | 14.5 | 120 | 6.47 |  |  |  | 776 | 26.5 | 48.2 | 5.03 | 18.4 | 3.6 | 0.91 | 3.34 | 0.51 | 2.98 | 0.6 | 1.63 | 0.27 | 1.69 | 0.25 | 4.19 | 0.78 |  | 19 | 5.27 | 0.72001 | -6.82 |
|  | 143 | 331 | 20.2 | 89.2 | 8.38 |  |  |  | 831 | 30.7 | 59.7 | 6.55 | 25.6 | 5.24 | 1.25 | 4.59 | 0.72 | 4.41 | 0.87 | 2.27 | 0.36 | 2.35 | 0.34 | 3.21 | 0.84 |  | 10.6 | 2.26 | 0.71761 | -6.97 |
|  | 126 | 342 | 21.2 | 120 | 8.2 |  |  |  | 864 | 31.7 | 63.5 | 6.84 | 25.9 | 5.38 | 1.28 | 4.69 | 0.74 | 4.28 | 0.87 | 2.35 | 0.36 | 2.36 | 0.34 | 4.26 | 0.86 |  | 12.6 | 3.12 | 0.71741 | -7.12 |
|  | 154 | 262 | 16.6 | 111 | 8.71 |  |  |  | 807 | 28.4 | 49.1 | 5.42 | 19.7 | 3.92 | 1.15 | 3.54 | 0.54 | 3.17 | 0.59 | 1.73 | 0.31 | 1.82 | 0.28 | 3.16 | 0.87 |  | 5.05 | 20 |  |  |
|  | 150 | 264 | 17.5 | 114 | 9.25 |  |  |  | 668 | 31.6 | 53.2 | 5.76 | 20.4 | 3.93 | 1.06 | 3.56 | 0.56 | 3.21 | 0.62 | 1.78 | 0.33 | 2.01 | 0.32 | 3.38 | 1.03 |  | 16.3 | 6.05 |  |  |
|  | 179 | 298 | 16.9 | 127 | 9.04 |  |  |  | 839 | 28.6 | 47.4 | 5.04 | 17.6 | 3.36 | 0.99 | 3.16 | 0.48 | 2.79 | 0.52 | 1.51 | 0.28 | 1.65 | 0.25 | 3.13 | 0.78 |  | 18.3 | 4.03 |  |  |
|  | 127 | 250 | 17.4 | 61.6 | 7.26 |  |  |  | 481 | 23 | 51 | 5.64 | 19.9 | 4.1 | 1.18 | 3.77 | 0.6 | 3.61 | 0.76 | 2.08 | 0.34 | 2.27 | 0.34 | 2.42 | 0.8 |  | 3.62 | 1.64 | 0.71999 | -6.76 |
|  | 121 | 269 | 18.7 | 76.8 | 8.3 |  |  |  | 315 | 19.2 | 44.7 | 5.36 | 21.3 | 4.44 | 1.02 | 3.87 | 0.66 | 4.02 | 0.8 | 2.15 | 0.36 | 2.46 | 0.36 | 3.18 | 1.18 |  | 3.53 | 4.27 | 0.72034 | -6.77 |
|  | 135 | 270 | 15.7 | 102 | 5.85 |  |  |  | 670 | 22.6 | 45.2 | 4.75 | 17.8 | 3.72 | 1.08 | 3.41 | 0.54 | 3.29 | 0.66 | 1.8 | 0.29 | 1.9 | 0.28 | 3.68 | 0.69 |  | 12.8 | 4.5 | 0.71978 | -6.52 |
|  | 131 | 302 | 12.6 | 76.2 | 7.69 |  |  |  | 344 | 18 | 36.9 | 4.15 | 15.5 | 3.2 | 0.82 | 2.9 | 0.45 | 2.69 | 0.55 | 1.5 | 0.25 | 1.52 | 0.23 | 2.82 | 0.98 |  | 4.96 | 4.35 | 0.71893 | -7.08 |
|  | 170 | 296 | 14.3 | 82.2 | 6.46 |  |  |  | 794 | 23.6 | 43.5 | 4.62 | 17.3 | 3.54 | 0.96 | 3.27 | 0.51 | 2.97 | 0.6 | 1.62 | 0.26 | 1.63 | 0.23 | 2.72 | 0.63 |  | 9.12 | 2.16 | 0.71876 | -4.33 |
|  | 145 | 246 | 16.2 | 122 | 7.35 |  |  |  | 692 | 24.1 | 42.5 | 4.74 | 17.4 | 3.55 | 1.06 | 3.18 | 0.51 | 3.03 | 0.58 | 1.68 | 0.3 | 1.85 | 0.29 | 3.3 | 0.72 |  | 13.2 | 3.89 |  |  |
|  | 143 | 255 | 20.7 | 93.4 | 9.76 |  |  |  | 346 | 26.4 | 49.2 | 5.68 | 20.9 | 4.15 | 0.99 | 3.85 | 0.62 | 3.58 | 0.67 | 1.94 | 0.35 | 2.18 | 0.34 | 2.69 | 0.81 |  | 10.7 | 3.92 |  |  |
|  | 86.2 | 303 | 23.6 | 119 | 9.19 |  |  |  | 881 | 28 | 49.8 | 6.05 | 23.6 | 4.86 | 1.38 | 4.46 | 0.74 | 4.58 | 0.88 | 2.55 | 0.45 | 2.66 | 0.41 | 3.45 | 0.65 |  | 8.33 | 1.7 |  |  |
|  | 130 | 151 | 7.79 | 245 | 9.61 |  |  | 1.89 | 1568 | 64.5 | 106 | 11.1 | 35.2 | 4.86 | 1.08 | 3.33 | 0.4 | 1.83 | 0.29 | 0.77 | 0.1 | 0.64 | 0.1 | 5.81 | 0.36 | 21.9 | 20.2 | 1.85 | 0.71593 | -3.7 |
|  | 125 | 172 | 7.79 | 276 | 10.6 |  |  | 1.87 | 1888 | 49.3 | 88 | 10.1 | 32.3 | 4.49 | 1.09 | 3.02 | 0.36 | 1.75 | 0.29 | 0.81 | 0.11 | 0.69 | 0.11 | 6.42 | 0.29 | 23.2 | 19.6 | 0.67 | 0.715619 | -5 |
|  |  |  |  |  |  |  |  |  |  |  |  |  |  |  |  |  |  |  |  |  |  |  |  |  |  |  |  |  |  |  |
|  | 147 | 228 | 7.74 | 220 | 9.66 |  |  | 3.59 | 1249 | 39.7 | 66.1 | 6.39 | 20.3 | 2.95 | 0.9 | 2.18 | 0.27 | 1.43 | 0.26 | 0.72 | 0.1 | 0.65 | 0.11 | 4.77 | 0.34 | 21.2 | 17.3 | 1.18 | 0.715045 | -4.2 |
|  | 101 | 214 | 8.31 | 219 | 8.07 |  |  | 2.58 | 493 | 36.1 | 60.9 | 6.38 | 21 | 2.95 | 0.85 | 2.15 | 0.27 | 1.41 | 0.25 | 0.73 | 0.1 | 0.69 | 0.1 | 4.4 | 0.68 | 36.1 | 7.4 | 0.74 | 0.711557 | 1.1 |
|  | 202 | 137 | 24.4 | 272 | 19.3 |  |  | 2.84 | 881 | 61.3 | 117 | 13.5 | 47.7 | 8.18 | 1.04 | 6.61 | 0.87 | 4.79 | 0.87 | 2.45 | 0.35 | 2.16 | 0.32 | 6.88 | 1.04 | 37 | 23.2 | 3.12 | 0.713814 | 0.2 |
|  |  |  |  |  |  |  |  |  |  |  |  |  |  |  |  |  |  |  |  |  |  |  |  |  |  |  |  |  |  |  |
|  | 91.2 | 327 | 7.55 | 176 | 4.59 |  |  | 2.9 | 2168 | 38.7 | 63.6 | 6.22 | 20 | 2.98 | 1.06 | 2.19 | 0.27 | 1.4 | 0.24 | 0.7 | 0.1 | 0.71 | 0.11 | 4.24 | 0.38 | 24.8 | 15.7 | 1.27 | 0.712438 | -1.5 |
|  |  |  |  |  |  |  |  |  |  |  |  |  |  |  |  |  |  |  |  |  |  |  |  |  |  |  |  |  |  |  |
|  | 107 | 151 | 9.35 | 182 | 11.5 |  |  | 3.11 | 1079 | 49 | 83.5 | 8.01 | 25.5 | 3.79 | 0.94 | 2.88 | 0.37 | 1.8 | 0.31 | 0.83 | 0.11 | 0.69 | 0.11 | 4.39 | 0.74 | 22.8 | 15.3 | 1.17 |  |  |
|  | 72.7 | 225 | 5.22 | 106 | 3.48 |  |  | 1.77 | 262 | 11.6 | 15 | 1.98 | 6.85 | 1.17 | 0.49 | 1.04 | 0.14 | 0.82 | 0.15 | 0.44 | 0.07 | 0.45 | 0.07 | 2.82 | 0.15 | 6.5 | 3.7 | 0.67 | 0.711977 | -3 |
|  | 244 | 76 | 34 | 207 | 19.1 |  |  |  | 447 | 34 | 75 | 7.2 | 27 | 5.2 | 0.7 | 5.1 | 0.86 | 5.2 | 1.05 | 3.3 | 0.52 | 3.53 | 0.55 | 6.7 | 2.36 | 25 | 35.2 | 6.7 |  | -6.7 |
|  | 218 | 170 | 27 | 221 | 15.1 |  |  |  | 1282 | 44 | 71 | 9.6 | 35 | 6.1 | 1.5 | 5.8 | 0.85 | 4.6 | 0.87 | 2.56 | 0.36 | 2.28 | 0.34 | 6.46 | 1.34 | 34 | 23 | 3.2 | 0.735309 | -6.5 |
|  | 259 | 116 | 37 | 254 | 21.8 |  |  |  | 891 | 53 | 78 | 12.4 | 47 | 8.4 | 1.5 | 8 | 1.22 | 6.7 | 1.28 | 3.91 | 0.56 | 3.63 | 0.55 | 8.32 | 2.39 | 26 | 17.3 | 3.9 |  | -5.9 |
|  | 202 | 206 | 48 | 260 | 23.9 |  |  |  | 1109 | 45 | 86 | 9.9 | 38 | 8.1 | 1.5 | 8.1 | 1.41 | 8.5 | 1.63 | 4.73 | 0.7 | 4.43 | 0.63 | 7.44 | 2.73 | 31 | 14.9 | 3.7 | 0.72701 | -6.4 |
|  | 137 | 479.1 | 26.07 | 175.6 | 18.48 | 0.58 | 2 | 2.89 | 935 | 31.17 | 60.06 | 7.06 | 27.11 | 4.87 | 1.48 | 4.8 | 0.68 | 3.71 | 0.71 | 2.09 | 0.29 | 1.9 | 0.29 | 3.24 | 0.82 | 14.23 | 12.98 | 1.83 | 0.714207 | -4.8 |
|  | 105.3 | 375 | 16.01 | 150.6 | 14.62 | 0.25 | 1.91 | 3.8 | 874 | 28.61 | 52.71 | 5.85 | 21.26 | 3.6 | 1.09 | 3.52 | 0.47 | 2.37 | 0.44 | 1.3 | 0.18 | 1.19 | 0.18 | 4.21 | 0.85 | 19.1 | 14.9 | 2.8 |  |  |
|  | 191.2 | 160.5 | 35.85 | 276.6 | 24.89 | 0.95 | 5.99 | 18.49 | 658 | 22.21 | 46.34 | 6.1 | 25.77 | 6.27 | 1.36 | 6.43 | 1.12 | 6.72 | 1.33 | 3.96 | 0.59 | 3.87 | 0.6 | 8.04 | 1.7 | 23.24 | 17.2 | 5.3 |  |  |
|  | 187 | 161.3 | 33.84 | 277.1 | 22.45 | 0.81 | 4.5 | 15.73 | 869 | 24.87 | 38.94 | 5.1 | 21.76 | 5.46 | 1.47 | 5.76 | 1.03 | 6.3 | 1.25 | 3.71 | 0.56 | 3.67 | 0.56 | 8.02 | 1.56 | 27.35 | 21.02 | 6.19 | 0.731459 | -6.5 |
|  | 186.4 | 162.8 | 34.13 | 214.3 | 22.28 | 0.91 | 3.86 | 12.36 | 692 | 30.11 | 61.02 | 7.53 | 30.14 | 6.39 | 1.42 | 6.46 | 1.08 | 6.41 | 1.26 | 3.78 | 0.56 | 3.7 | 0.56 | 6.25 | 1.43 | 22.85 | 15.42 | 4.5 |  |  |
|  | 173.4 | 167.3 | 31.8 | 232.1 | 22.31 | 0.79 | 4.71 | 15.94 | 743 | 27.42 | 56.21 | 7.07 | 28.56 | 6.3 | 1.45 | 6.32 | 1.06 | 6.15 | 1.19 | 3.49 | 0.51 | 3.29 | 0.5 | 6.71 | 1.38 | 23.49 | 16.94 | 4.05 | 0.729816 | -6.2 |
|  | 168.5 | 439.5 | 28.55 | 211.4 | 32.07 | 1.93 | 2.05 | 17.65 | 983 | 36.58 | 69.61 | 8.02 | 30.43 | 5.46 | 1.59 | 5.35 | 0.77 | 4.11 | 0.77 | 2.26 | 0.32 | 2.11 | 0.32 | 5.55 | 1.79 | 20.96 | 16.84 | 2.77 |  |  |
|  | 158.7 | 447.1 | 26.92 | 224.5 | 31.29 | 1.9 | 1.92 | 8.93 | 1006 | 34.58 | 65.72 | 7.7 | 29.34 | 5.22 | 1.59 | 5.16 | 0.73 | 3.9 | 0.73 | 2.14 | 0.3 | 1.96 | 0.3 | 5.82 | 1.58 | 18.04 | 17.45 | 3.14 | 0.712216 | -3.2 |
|  | 83.8 | 202.1 | 15.61 | 69.9 | 17.2 | 1 | 0.96 | 3.87 | 464 | 17.32 | 34.69 | 4.21 | 16.29 | 3.01 | 0.79 | 2.92 | 0.43 | 2.36 | 0.45 | 1.3 | 0.19 | 1.21 | 0.18 | 1.93 | 0.83 | 8.36 | 9.81 | 0.98 | 0.712948 | -3.5 |
|  | 198 | 421.7 | 25.5 | 212.6 | 33.92 | 0.42 | 1.76 | 10.88 | 969 | 40.93 | 75.29 | 8.3 | 29.74 | 4.9 | 1.39 | 4.78 | 0.68 | 3.58 | 0.68 | 2 | 0.28 | 1.88 | 0.29 | 5.6 | 2.06 | 15.97 | 19 | 3.25 | 0.713648 | -3 |
|  | 174.7 | 444.7 | 28.35 | 241.9 | 31.32 | 1.82 | 1.98 | 7.26 | 1045 | 38.09 | 70.27 | 8.05 | 30.32 | 5.43 | 1.58 | 5.27 | 0.76 | 4.1 | 0.77 | 2.26 | 0.32 | 2.12 | 0.33 | 6.28 | 1.79 | 20.57 | 19.03 | 3.42 |  |  |
|  | 151.5 | 224.7 | 29.76 | 250.2 | 24.24 | 0.89 | 3.88 | 11.72 | 709 | 28.67 | 56.35 | 7.01 | 28.52 | 6.16 | 1.51 | 6.06 | 0.99 | 5.72 | 1.11 | 3.22 | 0.46 | 2.97 | 0.46 | 7.05 | 1.41 | 19.76 | 14.91 | 4.78 | 0.722181 | -7 |
|  | 157.5 | 209.3 | 31.01 | 258 | 23.48 | 1.3 | 3.56 | 12.31 | 813 | 35.01 | 69.27 | 8.29 | 32.38 | 6.42 | 1.64 | 6.29 | 1 | 5.68 | 1.08 | 3.16 | 0.45 | 2.84 | 0.43 | 7.37 | 1.36 | 21.46 | 16.11 | 2.87 |  |  |
|  | 152.1 | 262.3 | 33.93 | 157.3 | 21.44 | 1.47 | 3 | 10.15 | 897 | 26.81 | 53.37 | 6.6 | 26.65 | 5.5 | 1.55 | 5.28 | 0.85 | 4.79 | 0.92 | 2.66 | 0.37 | 2.38 | 0.36 | 4.56 | 1.19 | 22.1 | 10.96 | 2.32 | 0.722038 | -6.4 |
|  | 132.5 | 259.3 | 33.24 | 256.1 | 29.12 | 0.36 | 3.54 | 11.15 | 874 | 26.06 | 35.84 | 5.06 | 22.01 | 5.18 | 1.64 | 5.05 | 0.87 | 5.07 | 0.97 | 2.82 | 0.41 | 2.68 | 0.42 | 7.23 | 1.63 | 20.9 | 7.27 | 1.86 | 0.719601 | -6 |
|  | 205.9 | 144.7 | 31.71 | 175.5 | 26.88 | 0.66 | 12.38 | 22.96 | 541 | 33.86 | 68.48 | 9.8 | 32.23 | 6.56 | 1.1 | 6.24 | 1 | 5.76 | 1.09 | 3.23 | 0.46 | 3 | 0.45 | 5.03 | 1.68 | 25.33 | 28.38 | 6.49 | 0.737155 | -6.6 |
|  | 263.5 | 81.5 | 47.82 | 192.9 | 24.58 | 0.26 | 11.35 | 13.42 | 267 | 37.93 | 78.07 | 11 | 33.95 | 7.05 | 0.65 | 7.24 | 1.29 | 8.09 | 1.61 | 4.95 | 0.75 | 5.03 | 0.76 | 5.26 | 2.5 | 35.4 | 28.96 | 6.89 | 0.775719 | -7.9 |
|  | 182.9 | 98.1 | 46.06 | 223.5 | 27.19 | 1.01 | 8.13 | 7.01 | 361 | 32.27 | 65.52 | 9.27 | 31.64 | 7.25 | 1.05 | 7.37 | 1.34 | 8.31 | 1.63 | 4.83 | 0.71 | 4.55 | 0.68 | 6.74 | 1.64 | 25.8 | 24.94 | 7.99 | 0.743834 | -6.4 |
|  | 228.5 | 103.8 | 35.53 | 152.2 | 25.73 | 0.51 | 7.37 | 18.46 | 509 | 34.8 | 68.49 | 9.47 | 31.1 | 6.42 | 0.88 | 6.29 | 1.07 | 6.41 | 1.25 | 3.75 | 0.56 | 3.61 | 0.54 | 4.99 | 1.85 | 33.84 | 26.69 | 4.42 | 0.752636 | -7.7 |
|  | 242 | 148 | 26.38 | 151 | 26.13 | 1.2 | 9.04 | 21.74 | 425 | 32.05 | 64.35 | 8.61 | 28.4 | 5.7 | 0.91 | 5.35 | 0.88 | 5.08 | 0.95 | 2.87 | 0.43 | 2.83 | 0.42 | 4.72 | 1.84 | 21.45 | 17.5 | 6.32 | 0.742423 | -7.5 |
|  | 218.1 | 101.9 | 30.64 | 161.4 | 29.92 | 0.48 | 6.32 | 19.8 | 437 | 35.83 | 73.2 | 9.81 | 33.49 | 6.66 | 0.97 | 6.38 | 1.05 | 6.08 | 1.14 | 3.27 | 0.46 | 3.06 | 0.46 | 5.16 | 1.93 | 27.69 | 28.12 | 4.52 | 0.751749 | -7.7 |
|  | 196.9 | 110.7 | 27.66 | 160.9 | 24.49 | 0.65 | 6.01 | 16.05 | 430 | 46.59 | 92.99 | 12.13 | 41.79 | 7.95 | 1.02 | 7.31 | 1.06 | 5.61 | 1.02 | 2.94 | 0.39 | 2.47 | 0.37 | 5.07 | 1.42 | 28.21 | 29.65 | 5.65 |  |  |
|  | 171.8 | 145 | 23.4 | 170.9 | 22.44 | 0.35 | 5.33 | 14.4 | 568 | 28.39 | 55.62 | 7.26 | 25.63 | 5.13 | 1.05 | 4.8 | 0.76 | 4.32 | 0.82 | 2.48 | 0.37 | 2.49 | 0.39 | 5.18 | 1.64 | 28.61 | 17.56 | 5.22 | 0.732548 | -7.8 |
|  | 312.5 | 75 | 39.36 | 177 | 27.46 | 0.31 | 8.61 | 29 | 377 | 69.92 | 135.89 | 15.29 | 55.52 | 10.29 | 0.82 | 9.78 | 1.47 | 7.83 | 1.43 | 4.13 | 0.56 | 3.56 | 0.52 | 5.55 | 2.38 | 32.05 | 46 | 6.22 | 0.786025 | -7.8 |
|  | 212.2 | 90.5 | 43.73 | 191.8 | 20.58 | 0.82 | 7.12 | 24.15 | 420 | 22.96 | 47.58 | 6.2 | 25.21 | 6.13 | 1.14 | 6.46 | 1.22 | 7.79 | 1.56 | 4.66 | 0.69 | 4.51 | 0.68 | 6.03 | 1.51 | 33.95 | 25.75 | 6.58 | 0.757171 | -7.3 |
|  | 124 | 228 | 23.9 | 187 | 11.4 |  |  | 7.67 | 528 | 34 | 67.9 | 7.61 | 28.8 | 5.56 | 1.25 | 4.69 | 0.73 | 4.17 | 0.81 | 2.16 | 0.33 | 2.01 | 0.3 | 4.49 | 1.01 | 15.3 | 10 | 2.82 |  |  |
|  | 118 | 243 | 21 | 202.1 | 9.68 |  |  | 5.82 | 659 | 27.3 | 53.3 | 6.16 | 23.7 | 4.64 | 1.29 | 4.32 | 0.64 | 3.77 | 0.73 | 2.12 | 0.29 | 1.85 | 0.28 | 5.27 | 0.71 | 18.3 | 7.9 | 2.54 | 0.722979 | -8.8 |
|  | 85 | 235 | 13.9 | 345 | 8.49 |  |  | 6.81 | 408 | 14 | 31.3 | 3.76 | 14.8 | 2.67 | 0.89 | 2.27 | 0.34 | 2.08 | 0.42 | 1.37 | 0.21 | 1.6 | 0.27 | 8.29 | 0.73 | 14.3 | 4.2 | 2.44 | 0.717997 | -8.2 |
|  | 1315 | 280 | 16.8 | 159 | 9.49 |  |  | 7.33 | 483 | 36 | 70.6 | 7.74 | 28 | 4.82 | 1.1 | 3.68 | 0.52 | 2.81 | 0.55 | 1.55 | 0.23 | 1.42 | 0.21 | 4.1 | 0.97 | 15.2 | 11.5 | 2.35 |  |  |
|  | 2475 | 62 | 57.6 | 70.6 | 12.51 |  |  | 7.67 | 291 | 28.4 | 59.8 | 7.22 | 29.1 | 8.07 | 0.44 | 8.6 | 1.5 | 9.32 | 1.95 | 5.73 | 0.84 | 5.02 | 0.79 | 2.7 | 1.62 | 45.3 | 31.9 | 4.91 |  |  |
|  | 1815 | 45 | 36.2 | 84.8 | 7.55 |  |  | 6.66 | 174 | 27.3 | 57.2 | 6.93 | 27.2 | 7.06 | 0.47 | 6.22 | 0.99 | 5.99 | 1.26 | 3.96 | 0.64 | 4.26 | 0.68 | 3.2 | 1.37 | 43 | 18.9 | 4.01 |  |  |
|  | 1575 | 71 | 33.1 | 107.2 | 10.22 |  |  | 5.95 | 389 | 32.1 | 64.4 | 7.46 | 29.5 | 6.61 | 0.67 | 6 | 0.87 | 5.1 | 1.11 | 3.69 | 0.61 | 4.26 | 0.78 | 3.65 | 0.71 | 39.4 | 23.2 | 3.31 | 0.759557 | -10.5 |
|  | 168 | 94 | 43.3 | 79.8 | 8.9 |  |  | 12.4 | 483 | 27 | 54.6 | 6.24 | 23.3 | 5.01 | 0.8 | 5.2 | 0.97 | 6.75 | 1.38 | 4.11 | 0.61 | 3.79 | 0.55 | 2.55 | 1.07 | 36 | 12.5 | 4.44 | 0.75061 | -10.1 |
|  | 107 | 92 | 35.5 | 197.3 | 10.21 |  |  | 7.58 | 533 | 32.8 | 69.17 | 8.91 | 35.15 | 7.18 | 1.54 | 6.88 | 1.09 | 6.29 | 1.35 | 3.85 | 0.58 | 3.79 | 0.57 | 5.54 | 0.86 | 5.8 | 10.1 | 4.62 | 0.72976 | -6.5 |
|  | 195 | 81 | 20.1 | 78 | 8.42 |  |  | 8.92 | 294 | 19.2 | 38.22 | 4.66 | 16.16 | 3.51 | 0.55 | 3.31 | 0.55 | 3.38 | 0.69 | 2.05 | 0.36 | 2.53 | 0.39 | 2.83 | 1.9 | 36.2 | 10.3 | 5.1 | 0.763572 | -8.9 |
|  | 151 | 66 | 62.1 | 296.1 | 11.83 |  |  | 3.7 | 508 | 89.9 | 187.6 | 21.64 | 77.04 | 14.42 | 1.41 | 13.02 | 1.88 | 10.78 | 2.37 | 6.86 | 1.07 | 6.84 | 1.02 | 8.58 | 0.8 | 23 | 45.9 | 2.97 | 0.75193 | -6.2 |
|  | 203 | 144 | 41.1 | 212.2 | 17.4 |  |  | 18.3 | 938 | 50.5 | 97.2 | 11 | 41.3 | 8.44 | 1.37 | 7.52 | 1.2 | 6.96 | 1.28 | 3.62 | 0.51 | 3.27 | 0.5 | 6.3 | 1.79 | 21.5 | 21.4 | 5.41 |  |  |
|  | 85 | 254 | 32.3 | 107.2 | 10.41 |  |  | 5.19 | 326 | 32.4 | 63.9 | 8.12 | 31 | 8.18 | 1.05 | 7.12 | 1.16 | 5.8 | 1.02 | 2.58 | 0.37 | 2.35 | 0.33 | 3.56 | 1.54 | 34.8 | 14.4 | 5.69 |  |  |
|  | 287 | 94 | 12.5 | 82.5 | 10.01 |  |  | 15.5 | 444 | 18 | 46.9 | 4.64 | 17 | 4.07 | 0.51 | 2.95 | 0.46 | 2.44 | 0.4 | 1.06 | 0.18 | 1.1 | 0.16 | 2.54 | 1.69 | 38.1 | 11.3 | 4.36 |  |  |
|  | 281 | 80 | 12.8 | 72.3 | 8.84 |  |  | 14.41 | 343 | 17.7 | 37.7 | 4.24 | 15.8 | 3.45 | 0.54 | 2.86 | 0.45 | 2.25 | 0.42 | 1.21 | 0.15 | 1.01 | 0.15 | 2.25 | 1.61 | 35.3 | 10.2 | 3.18 |  |  |
|  | 189 | 128 | 15.4 | 162 | 12.12 |  |  | 10.72 | 398 | 33.4 | 69.3 | 7.65 | 28 | 5.28 | 0.76 | 3.75 | 0.54 | 2.83 | 0.52 | 1.43 | 0.2 | 1.39 | 0.21 | 4.27 | 1.43 | 25.3 | 17.9 | 2.51 |  |  |
|  | 151 | 263 | 11.6 | 126.3 | 8.81 |  |  | 11.4 | 863 | 20.3 | 43.4 | 4.88 | 18.8 | 3.95 | 0.95 | 2.72 | 0.39 | 2.13 | 0.37 | 1.05 | 0.17 | 1.08 | 0.18 | 3.48 | 1.09 | 21.9 | 9.36 | 2.19 |  |  |
|  | 334 | 99 | 18 | 179.1 | 16.42 |  |  | 16.82 | 505 | 52.3 | 118 | 13.7 | 52.2 | 10.5 | 0.75 | 6.66 | 0.85 | 4.04 | 0.6 | 1.48 | 0.19 | 1.28 | 0.17 | 5.04 | 1.45 | 45.2 | 37.9 | 5.48 |  |  |
|  | 191 | 88 | 14.9 | 79.8 | 12.7 |  |  | 19.12 | 297 | 10.1 | 23 | 2.62 | 9.9 | 2.46 | 0.48 | 2.31 | 0.42 | 2.42 | 0.44 | 1.28 | 0.19 | 1.29 | 0.19 | 2.35 | 1.82 | 30.2 | 12.8 | 5.14 | 0.74024 | -10.7 |
|  | 366 | 71 | 17.7 | 122 | 14.21 |  |  | 15.61 | 336 | 34.4 | 75.1 | 9.1 | 34.5 | 7.27 | 0.54 | 5.01 | 0.68 | 3.4 | 0.58 | 1.42 | 0.2 | 1.28 | 0.18 | 3.73 | 1.83 | 31.4 | 24.5 | 4.85 |  |  |
|  | 128 | 211 | 19.2 | 87 | 10.8 |  |  | 6.18 | 549 | 28.7 | 57.3 | 6.85 | 26 | 5.09 | 1.2 | 4.42 | 0.69 | 4.06 | 0.77 | 2.05 | 0.28 | 1.66 | 0.24 | 2.37 | 0.81 | 16.4 | 8.55 | 1.41 | 0.724561 | -9.2 |
|  | 125 | 221 | 16 | 160 | 11 |  |  | 6.91 | 586 | 25.3 | 49.4 | 5.98 | 21.2 | 3.76 | 1.16 | 3.41 | 0.55 | 3.04 | 0.66 | 1.66 | 0.24 | 1.51 | 0.23 | 4.36 | 0.84 | 17.2 | 8.05 | 1.81 |  |  |
|  | 140 | 209 | 14.2 | 100 | 10.8 |  |  | 8.2 | 567 | 54.3 | 107 | 12.2 | 42.8 | 6.56 | 1.21 | 4.73 | 0.6 | 3.06 | 0.53 | 1.48 | 0.21 | 1.35 | 0.21 | 2.61 | 0.87 | 18.4 | 14.3 | 2.46 | 0.726385 | -9.1 |
|  | 124 | 209 | 12.5 | 111 | 9.5 |  |  | 7.57 | 581 | 26.7 | 51.3 | 5.93 | 21.3 | 3.86 | 1.16 | 3.26 | 0.45 | 2.59 | 0.48 | 1.28 | 0.18 | 1.17 | 0.18 | 2.89 | 0.74 | 17.2 | 7.42 | 1.59 |  |  |
|  | 124 | 212 | 18.8 | 104 | 8.9 |  |  | 6.45 | 555 | 31.7 | 61.8 | 7.24 | 26.5 | 4.94 | 1.11 | 4.15 | 0.62 | 3.6 | 0.7 | 1.94 | 0.29 | 1.88 | 0.29 | 2.92 | 0.82 | 20.2 | 10.4 | 2.37 | 0.724302 | -9.2 |
|  | 126 | 202 | 18.1 | 109 | 9.5 |  |  | 8.37 | 463 | 27.7 | 54.1 | 6.25 | 23 | 4.34 | 1.06 | 3.72 | 0.59 | 3.42 | 0.66 | 1.86 | 0.27 | 1.74 | 0.26 | 2.86 | 0.81 | 18.2 | 8.59 | 2.52 |  |  |
|  | 113 | 204 | 24.8 | 128 | 7.9 |  |  | 3.65 | 332 | 20 | 42.7 | 5.53 | 21.9 | 4.7 | 1.16 | 4.45 | 0.73 | 4.39 | 0.93 | 2.54 | 0.38 | 2.42 | 0.37 | 3.56 | 0.66 | 12.7 | 5.73 | 1.01 |  |  |
|  | 129 | 200 | 18.8 | 161 | 11.1 |  |  | 7.12 | 556 | 31.5 | 62.5 | 7.28 | 27.3 | 5.07 | 1.16 | 4.26 | 0.66 | 3.61 | 0.73 | 1.85 | 0.27 | 1.79 | 0.27 | 4.6 | 0.9 | 19.2 | 11.5 | 2.7 |  |  |
|  | 129 | 209 | 19.6 | 168 | 11.1 |  |  | 6.98 | 566 | 43.4 | 82.5 | 9.49 | 35.3 | 6.04 | 1.21 | 4.73 | 0.69 | 3.77 | 0.75 | 1.93 | 0.29 | 1.81 | 0.28 | 4.95 | 0.96 | 21.2 | 15.6 | 2.34 | 0.725346 | -10.7 |
|  | 122 | 191 | 38 | 129 | 10.5 |  |  | 5.85 | 304 | 13.1 | 30.5 | 4.69 | 21.1 | 6.43 | 1.1 | 7.45 | 1.24 | 7.56 | 1.49 | 3.92 | 0.56 | 3.21 | 0.43 | 3.62 | 0.76 | 14.6 | 4.35 | 1.1 | 0.724842 | -9.1 |
|  | 144 | 202 | 25.9 | 167 | 9.1 |  |  | 5.21 | 447 | 27.7 | 56.7 | 6.89 | 26.4 | 5.82 | 1.13 | 5.56 | 0.88 | 5.05 | 1.03 | 2.71 | 0.38 | 2.26 | 0.33 | 4.39 | 0.73 | 13.8 | 9.31 | 0.98 | 0.726034 | -6.7 |
|  | 124 | 216 | 19.7 | 146 | 10.9 |  |  | 6.57 | 580 | 50.8 | 96.6 | 10.9 | 40.6 | 6.97 | 1.24 | 5.15 | 0.75 | 3.92 | 0.76 | 1.87 | 0.28 | 1.77 | 0.26 | 4.16 | 0.88 | 21.2 | 17.2 | 2.61 | 0.722833 | -8.2 |
|  | 151 | 350 | 16 | 202 | 9 |  |  | 9.79 | 783 | 35.8 | 70.2 | 8.55 | 29.5 | 4.74 | 0.99 | 3.9 | 0.51 | 2.73 | 0.52 | 1.4 | 0.22 | 1.45 | 0.23 | 5.51 | 0.96 | 126 | 23.1 | 3.54 | 0.72234 | -7.88 |
|  | 155 | 344 | 16.1 | 208 | 9.19 |  |  | 10.7 | 822 | 34.2 | 69.4 | 8.66 | 29.3 | 4.63 | 0.97 | 3.44 | 0.46 | 2.62 | 0.5 | 1.32 | 0.2 | 1.35 | 0.22 | 5.37 | 0.94 | 121 | 21.4 | 3.21 | 0.722404 | -7.49 |
|  | 149 | 345 | 16.1 | 214 | 9.07 |  |  | 10.1 | 760 | 33.3 | 68.8 | 8.32 | 29.2 | 4.75 | 1 | 3.68 | 0.51 | 2.78 | 0.52 | 1.37 | 0.21 | 1.37 | 0.22 | 5.53 | 0.92 | 123 | 23 | 3.55 |  |  |
|  | 146 | 352 | 14.8 | 236 | 8.71 |  |  | 9.18 | 796 | 31.1 | 64.3 | 7.75 | 26.7 | 4.34 | 0.93 | 3.53 | 0.47 | 2.64 | 0.5 | 1.35 | 0.21 | 1.39 | 0.22 | 6.31 | 0.82 | 120 | 21.7 | 4.1 |  |  |
|  | 167 | 375 | 17.3 | 224 | 9.68 |  |  | 10.2 | 819 | 30.9 | 65.9 | 8.05 | 28.8 | 4.94 | 1.04 | 3.95 | 0.52 | 2.93 | 0.56 | 1.49 | 0.23 | 1.54 | 0.25 | 5.77 | 1.09 | 131 | 25.4 | 4.29 |  |  |
|  | 163 | 382 | 16.5 | 226 | 9.2 |  |  | 11 | 852 | 34.2 | 71.4 | 8.75 | 30.2 | 4.89 | 0.98 | 3.73 | 0.52 | 2.87 | 0.54 | 1.47 | 0.23 | 1.55 | 0.25 | 6.22 | 1.05 | 138 | 26.7 | 5.28 |  |  |
|  | 166 | 344 | 16 | 215 | 9.01 |  |  | 8.01 | 784 | 37.9 | 76.5 | 9.01 | 30.7 | 4.79 | 1 | 3.76 | 0.49 | 2.76 | 0.53 | 1.47 | 0.22 | 1.49 | 0.23 | 5.87 | 0.96 | 125 | 24.6 | 5.23 |  |  |
|  | 162 | 343 | 15.8 | 193 | 9.13 |  |  | 9.97 | 804 | 34.5 | 72.4 | 8.67 | 30 | 4.85 | 1.02 | 3.72 | 0.48 | 2.71 | 0.51 | 1.38 | 0.21 | 1.42 | 0.23 | 5.13 | 0.87 | 128 | 24.7 | 4.9 | 0.722313 | -8.32 |
|  | 167 | 343 | 16.9 | 210 | 9.92 |  |  | 15.7 | 797 | 31.2 | 65.6 | 7.96 | 27.5 | 4.62 | 0.95 | 3.69 | 0.52 | 2.83 | 0.55 | 1.45 | 0.22 | 1.52 | 0.24 | 5.73 | 1.22 | 133 | 22.2 | 4.11 | 0.719561 | -8.12 |
|  | 164 | 340 | 17.3 | 197 | 9.61 |  |  | 14.5 | 753 | 40 | 80.6 | 9.74 | 32.6 | 5.08 | 0.96 | 3.91 | 0.54 | 3.03 | 0.59 | 1.56 | 0.24 | 1.55 | 0.24 | 5.35 | 1.03 | 131 | 26.8 | 7.05 |  |  |
|  | 144 | 327 | 15.7 | 198 | 8.76 |  |  | 10.5 | 783 | 35.6 | 73 | 8.84 | 29.8 | 4.73 | 0.97 | 3.7 | 0.51 | 2.8 | 0.54 | 1.43 | 0.22 | 1.47 | 0.23 | 5.43 | 0.91 | 133 | 26.5 | 4.89 |  |  |
|  | 157 | 343 | 17.1 | 194 | 9.33 |  |  | 11.5 | 797 | 37 | 76.3 | 9.53 | 32.6 | 5.34 | 1.05 | 4.09 | 0.55 | 3.03 | 0.58 | 1.51 | 0.22 | 1.53 | 0.24 | 5.34 | 0.98 | 118 | 23.2 | 5.37 |  |  |
|  | 163 | 349 | 17.2 | 219 | 9.28 |  |  | 15 | 851 | 41.4 | 84.4 | 10.2 | 33.7 | 5.12 | 1.03 | 3.89 | 0.53 | 2.9 | 0.56 | 1.47 | 0.22 | 1.54 | 0.24 | 5.91 | 0.95 | 112 | 25.6 | 5.01 | 0.722454 | -7.82 |
|  | 161 | 349 | 16.2 | 205 | 8.7 |  |  | 10.6 | 792 | 35.6 | 73.1 | 8.97 | 30.8 | 4.74 | 0.99 | 3.58 | 0.49 | 2.7 | 0.52 | 1.39 | 0.21 | 1.43 | 0.23 | 5.65 | 1.02 | 157 | 25.5 | 4.76 | 0.722958 | -7.84 |
|  | 153 | 337 | 15.7 | 220 | 9.2 |  |  | 10.4 | 745 | 34.2 | 68.8 | 8.22 | 27.6 | 4.5 | 0.97 | 3.57 | 0.46 | 2.57 | 0.5 | 1.33 | 0.21 | 1.38 | 0.22 | 5.96 | 0.99 | 137 | 23.6 | 5.36 |  |  |
|  | 174 | 342 | 15.8 | 188 | 9.18 |  |  | 12 | 783 | 37.6 | 75.2 | 8.88 | 29.7 | 4.58 | 0.97 | 3.34 | 0.48 | 2.66 | 0.52 | 1.37 | 0.21 | 1.39 | 0.22 | 5.03 | 1.07 | 164 | 24.4 | 4.99 |  |  |
|  | 155 | 320 | 15.5 | 201 | 9.19 |  |  | 9.34 | 785 | 40.9 | 82.9 | 9.91 | 32.8 | 4.83 | 0.95 | 3.68 | 0.47 | 2.66 | 0.52 | 1.37 | 0.22 | 1.44 | 0.22 | 5.45 | 1.02 | 177 | 25.9 | 4.64 |  |  |
|  | 157 | 410 | 17.2 | 213 | 8.81 |  |  | 10.7 | 870 | 36.5 | 73.5 | 8.94 | 30.4 | 4.87 | 1.02 | 3.87 | 0.52 | 2.86 | 0.55 | 1.46 | 0.22 | 1.49 | 0.23 | 5.69 | 0.97 | 122 | 27.6 | 5.62 | 0.721741 | -7.54 |
|  | 168 | 361 | 16.4 | 208 | 9.43 |  |  | 12.1 | 769 | 41 | 82.8 | 9.88 | 32.5 | 5.01 | 1.04 | 3.97 | 0.53 | 2.85 | 0.55 | 1.48 | 0.22 | 1.51 | 0.24 | 5.67 | 0.98 | 120 | 25.7 | 4.44 |  |  |
|  | 150 | 371 | 15.6 | 199 | 8.56 |  |  | 10.9 | 803 | 35.6 | 72.8 | 9.02 | 30.1 | 4.73 | 0.97 | 3.51 | 0.48 | 2.66 | 0.51 | 1.37 | 0.2 | 1.39 | 0.22 | 5.44 | 0.94 | 114 | 22.8 | 4.92 |  |  |
|  | 180 | 364 | 16.6 | 199 | 9.13 |  |  | 14.1 | 845 | 37.4 | 75.4 | 9.12 | 31 | 4.99 | 1.01 | 3.85 | 0.53 | 2.9 | 0.55 | 1.45 | 0.22 | 1.49 | 0.23 | 5.36 | 1.04 | 129 | 26.3 | 5.69 |  |  |
|  | 157 | 352 | 15.2 | 198 | 8.88 |  |  | 13.1 | 849 | 39.7 | 77.8 | 9.18 | 30.4 | 4.71 | 1 | 3.61 | 0.46 | 2.6 | 0.49 | 1.3 | 0.2 | 1.3 | 0.21 | 5.03 | 0.87 | 108 | 23.9 | 5 |  |  |
|  | 167 | 376 | 15.5 | 211 | 8.64 |  |  | 16.9 | 839 | 32.8 | 68.5 | 8.5 | 29.1 | 4.66 | 0.97 | 3.51 | 0.48 | 2.65 | 0.52 | 1.38 | 0.22 | 1.41 | 0.22 | 5.57 | 0.85 | 131 | 24.6 | 5.41 |  |  |
|  | 171 | 355 | 17.8 | 210 | 10.4 |  |  | 16.9 | 761 | 38.7 | 79.4 | 9.7 | 33 | 5.23 | 1.03 | 4.12 | 0.55 | 3.02 | 0.58 | 1.53 | 0.23 | 1.56 | 0.25 | 5.76 | 1.16 | 141 | 27.4 | 6.92 | 0.722892 | -7.71 |
|  | 154 | 364 | 15.9 | 201 | 8.75 |  |  | 14.8 | 744 | 32.4 | 66.7 | 8.03 | 28 | 4.47 | 0.95 | 3.6 | 0.5 | 2.68 | 0.51 | 1.36 | 0.21 | 1.4 | 0.22 | 5.2 | 0.93 | 128 | 21.9 | 4.75 |  |  |
|  | 144 | 334 | 14.6 | 192 | 8.3 |  |  | 8.18 | 798 | 35.3 | 70.5 | 8.54 | 28.6 | 4.42 | 0.91 | 3.35 | 0.44 | 2.42 | 0.47 | 1.24 | 0.19 | 1.28 | 0.19 | 5.09 | 0.82 | 124 | 22.8 | 4.45 | 0.721934 | -7.19 |
|  | 178 | 363 | 16.5 | 239 | 8.99 |  |  | 11 | 849 | 36 | 73.9 | 8.6 | 29.7 | 4.83 | 1 | 3.73 | 0.5 | 2.78 | 0.52 | 1.42 | 0.22 | 1.46 | 0.23 | 6.37 | 0.96 | 121 | 25.6 | 4.65 | 0.722755 | -7.28 |
|  | 146 | 353 | 16.9 | 192 | 9.09 |  |  | 9.63 | 804 | 23.1 | 52.2 | 7.05 | 26.2 | 4.61 | 1 | 3.56 | 0.51 | 2.79 | 0.55 | 1.45 | 0.22 | 1.48 | 0.23 | 5.21 | 0.85 | 121 | 19.6 | 4.39 |  |  |
|  | 111 | 193 | 18.6 | 152 | 10.6 |  |  | 9.94 | 477 | 10 | 30.3 | 5.13 | 23.8 | 5.27 | 1.07 | 4.26 | 0.68 | 3.81 | 0.77 | 2.1 | 0.31 | 2 | 0.3 | 4.95 | 1.09 | 30.4 | 12.8 | 3.87 | 0.723693 | -7.17 |
|  | 87.7 | 218 | 25.5 | 293 | 11.8 |  |  | 3.93 | 479 | 27.7 | 69.4 | 10.3 | 44.2 | 8.52 | 1.47 | 6.65 | 0.97 | 5.2 | 1.03 | 2.88 | 0.4 | 2.63 | 0.39 | 9.29 | 1.11 | 27.7 | 22.2 | 6.21 | 0.720946 | -7.19 |
|  | 96.7 | 224 | 25.7 | 284 | 11.6 |  |  | 5.71 | 432 | 25.1 | 64.4 | 10.1 | 43.5 | 8.39 | 1.47 | 6.65 | 0.97 | 5.15 | 1.01 | 2.81 | 0.4 | 2.62 | 0.39 | 9.23 | 1.07 | 27 | 27 | 6.66 | 0.721272 | -7.13 |
|  | 118 | 188 | 19.9 | 152 | 11.9 |  |  | 11.5 | 472 | 10.2 | 31.8 | 5.42 | 25.6 | 5.59 | 1.09 | 4.45 | 0.72 | 4.02 | 0.83 | 2.21 | 0.32 | 2.11 | 0.31 | 4.96 | 1.24 | 29.9 | 16.4 | 4.15 | 0.724513 | -7.45 |
|  | 101 | 240 | 13.9 | 162 | 7.47 |  |  | 7.5 | 524 | 32.2 | 64.2 | 7.82 | 28.3 | 4.48 | 0.98 | 3.73 | 0.51 | 2.76 | 0.55 | 1.58 | 0.22 | 1.55 | 0.23 | 5.12 | 0.73 | 28.2 | 24.1 | 3.82 | 0.721471 | -7.11 |
|  | 165 | 171 | 10.9 | 151 | 6.53 |  |  | 25.5 | 430 | 24.7 | 55.1 | 7.36 | 29.7 | 4.54 | 0.94 | 3.25 | 0.45 | 2.23 | 0.45 | 1.21 | 0.18 | 1.15 | 0.18 | 4.83 | 0.53 | 26.1 | 29.7 | 4.24 | 0.728195 | -7.03 |
|  | 66.2 | 157 | 11.1 | 151 | 6.75 |  |  | 12.2 | 226 | 24.3 | 55 | 7.38 | 29.7 | 4.56 | 1 | 3.4 | 0.46 | 2.3 | 0.45 | 1.26 | 0.18 | 1.21 | 0.18 | 4.84 | 0.55 | 39.2 | 29.5 | 4.35 | 0.721625 | -7.33 |
|  | 120 | 416 | 9.42 | 185 | 7.24 |  |  | 8.34 | 753 | 40 | 73.2 | 8.02 | 25.1 | 3.48 | 0.75 | 2.64 | 0.31 | 1.72 | 0.31 | 0.82 | 0.12 | 0.8 | 0.13 | 4.85 | 0.84 | 113 | 20.4 | 2.77 |  |  |
|  | 132 | 462 | 9.61 | 147 | 6.27 |  |  | 4.92 | 726 | 30.7 | 59.3 | 6.69 | 21 | 3.1 | 0.7 | 2.38 | 0.32 | 1.67 | 0.29 | 0.81 | 0.11 | 0.76 | 0.11 | 3.73 | 0.58 | 105 | 17.9 | 3.05 |  |  |
|  | 149 | 280 | 9.08 | 166 | 7.09 |  |  | 8.33 | 635 | 33.6 | 63.8 | 7.15 | 21.8 | 3.15 | 0.71 | 2.29 | 0.31 | 1.58 | 0.28 | 0.75 | 0.11 | 0.73 | 0.12 | 4.32 | 0.76 | 97.8 | 19.3 | 3.25 | 0.721557 | -7.28 |
|  | 119 | 376 | 9.87 | 162 | 7.37 |  |  | 6.07 | 626 | 28.9 | 54 | 6.13 | 19.6 | 2.95 | 0.74 | 2.36 | 0.32 | 1.74 | 0.31 | 0.82 | 0.12 | 0.78 | 0.12 | 4.01 | 0.88 | 109 | 19.3 | 3.06 |  |  |
|  | 119 | 341 | 9.55 | 180 | 7.6 |  |  | 10.5 | 810 | 25.9 | 50.4 | 5.71 | 18.8 | 2.88 | 0.67 | 2.21 | 0.31 | 1.61 | 0.31 | 0.83 | 0.12 | 0.84 | 0.13 | 4.77 | 0.84 | 109 | 15.2 | 4.37 | 0.723169 | -7.3 |
|  | 136 | 350 | 9.34 | 181 | 7.07 |  |  | 4.17 | 726 | 25.3 | 47.2 | 5.32 | 17.3 | 2.73 | 0.69 | 2.29 | 0.3 | 1.66 | 0.3 | 0.81 | 0.12 | 0.78 | 0.12 | 4.48 | 0.81 | 102 | 14.6 | 3.24 |  |  |
|  | 121 | 467 | 9.97 | 179 | 7.66 |  |  | 10.3 | 771 | 29.8 | 58.5 | 6.54 | 21.7 | 3.32 | 0.77 | 2.59 | 0.31 | 1.78 | 0.32 | 0.84 | 0.13 | 0.86 | 0.13 | 4.9 | 0.94 | 116 | 18.1 | 3.88 |  |  |
|  | 131 | 335 | 9.95 | 197 | 7.96 |  |  | 12.3 | 567 | 28 | 51.4 | 5.92 | 18.9 | 2.98 | 0.74 | 2.44 | 0.32 | 1.74 | 0.32 | 0.82 | 0.13 | 0.84 | 0.13 | 4.9 | 0.88 | 98.9 | 15.9 | 3.77 |  |  |
|  | 129 | 378 | 10.7 | 185 | 8.29 |  |  | 9.53 | 762 | 25 | 48.6 | 5.45 | 18.5 | 3.06 | 0.77 | 2.57 | 0.36 | 1.89 | 0.34 | 0.92 | 0.14 | 0.91 | 0.13 | 4.78 | 0.92 | 119 | 18.2 | 3.33 |  |  |
|  | 125 | 394 | 9.21 | 176 | 7.26 |  |  | 10.1 | 823 | 33.4 | 63.1 | 7.09 | 22.2 | 3.23 | 0.71 | 2.28 | 0.29 | 1.55 | 0.29 | 0.71 | 0.11 | 0.74 | 0.12 | 4.43 | 0.77 | 120 | 20.2 | 3.5 |  |  |
|  | 119 | 403 | 8.51 | 180 | 6.13 |  |  | 3.55 | 890 | 24.2 | 45.8 | 5.32 | 17.5 | 2.85 | 0.77 | 2.32 | 0.29 | 1.57 | 0.28 | 0.7 | 0.1 | 0.67 | 0.1 | 4.43 | 0.58 | 108 | 13.7 | 2.13 | 0.719237 | -7.47 |
|  | 141 | 335 | 9.99 | 199 | 8.94 |  |  | 13.4 | 556 | 33 | 62.8 | 7.16 | 23.2 | 3.27 | 0.75 | 2.45 | 0.33 | 1.79 | 0.33 | 0.89 | 0.13 | 0.82 | 0.13 | 4.86 | 0.85 | 115 | 19.9 | 4.98 | 0.72051 | -6.88 |
|  | 245 | 178 | 19.8 | 190 | 13.64 | 0.44 | 4.68 | 8.1 | 854 | 37.43 | 79.21 | 7.33 | 23.84 | 4.03 | 0.81 | 3.69 | 0.53 | 3.05 | 0.62 | 1.9 | 0.29 | 2.04 | 0.33 | 5.15 | 1.61 | 64.45 | 37.9 | 15.44 |  |  |
|  | 205 | 130 | 26.47 | 229 | 13.45 | 0.52 | 3.91 | 6.35 | 631 | 45.89 | 98.74 | 9.47 | 30.89 | 5.71 | 0.91 | 5.14 | 0.74 | 4.29 | 0.85 | 2.5 | 0.36 | 2.45 | 0.37 | 6.13 | 1.53 | 38.22 | 46.38 | 10.68 |  |  |
|  | 184 | 202 | 37.93 | 314 | 19.68 | 0.54 | 6.31 | 4.73 | 779 | 50.41 | 115 | 11.78 | 41.08 | 8.04 | 1.28 | 7.12 | 1.08 | 6.32 | 1.26 | 3.63 | 0.53 | 3.51 | 0.53 | 7.98 | 1.99 | 43 | 40.86 | 7.57 |  |  |
|  | 207 | 147 | 25.02 | 210 | 16.1 | 0.2 | 7.04 | 10.23 | 625 | 42.64 | 88 | 8.44 | 27.89 | 5.03 | 0.82 | 4.55 | 0.67 | 3.95 | 0.8 | 2.41 | 0.36 | 2.51 | 0.39 | 5.48 | 1.65 | 42.28 | 30.74 | 8.17 |  |  |
|  | 395 | 85.7 | 19.3 | 167 | 16.79 | 1.1 | 9.18 | 19.78 | 494 | 29.78 | 67.4 | 6.34 | 21.29 | 3.62 | 0.59 | 3.31 | 0.48 | 2.84 | 0.58 | 1.82 | 0.29 | 2.06 | 0.34 | 4.97 | 2.51 | 45.36 | 41.66 | 15.31 |  |  |
|  | 261 | 60.97 | 23.52 | 168 | 14.53 | 0.42 | 23.66 | 5.74 | 539 | 45.05 | 100 | 9.62 | 32.32 | 5.74 | 1.02 | 4.94 | 0.68 | 3.76 | 0.75 | 2.29 | 0.35 | 2.51 | 0.4 | 4.84 | 1.8 | 23.24 | 37.31 | 11.56 |  |  |
|  | 364 | 149 | 34.81 | 243 | 23.59 | 2.44 | 10.68 | 15.3 | 962 | 46.13 | 118 | 11.2 | 38.95 | 7.07 | 1.12 | 6.3 | 0.94 | 5.52 | 1.13 | 3.42 | 0.52 | 3.74 | 0.59 | 6.98 | 3.44 | 83.9 | 38.9 | 13 |  |  |
|  | 336 | 87.87 | 26.36 | 171 | 19.35 | 2.98 | 5.46 | 18.13 | 318 | 34.12 | 78.71 | 7.58 | 25.08 | 4.43 | 0.51 | 4.07 | 0.62 | 3.81 | 0.8 | 2.53 | 0.41 | 2.97 | 0.48 | 5.4 | 3.17 | 55.25 | 42.65 | 14.99 |  |  |
|  | 63.00 | 382.00 | 22.60 | 99.10 | 13.10 |  |  |  | 554.00 | 28.00 | 55.80 | 7.25 | 28.80 | 5.62 | 1.49 | 4.91 | 0.76 | 4.34 | 0.81 | 2.21 | 0.32 | 2.26 | 0.31 | 2.65 | 0.44 | 25.50 | 6.08 | 1.23 | 0.71 | -6.50 |
|  | 79.40 | 385.00 | 23.40 | 138.00 | 19.70 |  |  |  | 618.00 | 29.70 | 59.30 | 7.54 | 30.20 | 5.74 | 1.60 | 5.09 | 0.77 | 4.40 | 0.83 | 2.26 | 0.33 | 2.34 | 0.33 | 3.59 | 0.66 | 33.60 | 7.89 | 1.91 | 0.71 | -6.30 |
|  | 121.00 | 383.00 | 23.80 | 137.00 | 17.70 |  |  |  | 631.00 | 52.10 | 82.80 | 8.65 | 33.90 | 6.22 | 1.59 | 6.05 | 0.88 | 4.60 | 0.86 | 2.49 | 0.34 | 2.14 | 0.33 | 3.86 | 0.92 | 29.80 | 11.20 | 2.71 | 0.71 | -6.60 |
|  | 86.20 | 411.00 | 20.90 | 93.20 | 11.00 |  |  |  | 500.00 | 38.60 | 64.40 | 6.73 | 27.60 | 5.42 | 1.49 | 5.14 | 0.78 | 4.17 | 0.77 | 2.24 | 0.30 | 1.97 | 0.31 | 2.83 | 0.56 | 13.40 | 7.39 | 1.65 | 0.71 | -6.80 |
|  | 194.00 | 367.00 | 23.70 | 205.00 | 35.30 |  |  |  | 644.00 | 35.30 | 68.50 | 9.82 | 31.00 | 5.74 | 1.39 | 5.33 | 0.79 | 4.28 | 0.81 | 2.39 | 0.34 | 2.28 | 0.35 | 5.50 | 1.50 | 22.30 | 29.90 | 6.21 | 0.72 | -6.70 |
|  | 182.00 | 405.00 | 22.60 | 264.00 | 32.70 |  |  |  | 851.00 | 35.90 | 67.90 | 9.50 | 30.20 | 5.54 | 1.51 | 5.14 | 0.75 | 4.08 | 0.76 | 2.26 | 0.32 | 2.10 | 0.32 | 6.77 | 1.13 | 19.80 | 20.50 | 4.13 | 0.72 | -6.70 |
|  | 162.00 | 411.00 | 24.80 | 247.00 | 20.90 |  |  |  | 906.00 | 37.30 | 72.10 | 8.61 | 34.40 | 6.54 | 1.75 | 6.31 | 0.95 | 5.08 | 0.96 | 2.74 | 0.40 | 2.61 | 0.40 | 6.82 | 1.06 | 19.30 | 13.70 | 2.79 | 0.72 | -6.70 |
|  | 116.00 | 293.00 | 32.10 | 148.00 | 21.20 |  |  |  | 642.00 | 32.90 | 57.80 | 7.55 | 32.30 | 6.68 | 1.80 | 5.42 | 0.91 | 5.59 | 1.11 | 3.13 | 0.47 | 3.70 | 0.54 | 4.22 | 1.17 | 28.60 | 6.11 | 1.56 | 0.72 | -6.50 |
|  | 232.40 | 68.50 | 20.99 | 142.00 | 23.25 | 0.12 | 3.17 | 9.51 | 433.00 | 38.09 | 78.94 | 9.87 | 34.50 | 6.73 | 0.85 | 6.03 | 0.85 | 4.22 | 0.73 | 2.07 | 0.27 | 1.66 | 0.24 | 4.50 | 1.26 |  | 28.63 | 2.90 |  |  |
|  | 188.80 | 123.30 | 39.82 | 181.40 | 24.67 | 1.04 | 8.98 | 20.56 | 522.00 | 35.18 | 72.50 | 9.60 | 34.84 | 7.54 | 1.07 | 7.47 | 1.29 | 7.67 | 1.45 | 4.25 | 0.61 | 3.88 | 0.55 | 5.59 | 2.24 |  | 24.52 | 5.42 | 0.74 | -7.30 |
|  | 313.20 | 77.80 | 26.07 | 163.50 | 25.49 | 0.90 | 10.80 | 25.22 | 458.00 | 37.94 | 78.12 | 10.14 | 34.55 | 7.05 | 0.89 | 6.59 | 1.00 | 5.33 | 0.95 | 2.75 | 0.38 | 2.51 | 0.37 | 5.22 | 2.22 |  | 29.87 | 22.27 | 0.79 | -8.40 |
|  | 215.60 | 76.00 | 25.77 | 110.00 | 19.02 | 0.21 | 6.55 | 25.50 | 418.00 | 20.75 | 39.51 | 5.15 | 17.94 | 3.47 | 0.67 | 3.35 | 0.53 | 3.04 | 0.56 | 1.64 | 0.23 | 1.49 | 0.22 | 3.56 | 1.85 |  | 15.32 | 2.52 |  |  |
|  | 223.60 | 84.50 | 25.63 | 107.60 | 19.99 | 0.14 | 6.32 | 24.29 | 433.00 | 29.58 | 57.72 | 7.09 | 24.73 | 4.61 | 0.74 | 4.23 | 0.61 | 3.17 | 0.55 | 1.59 | 0.21 | 1.41 | 0.21 | 3.42 | 1.76 |  | 22.37 | 3.03 | 0.76 | -8.20 |
|  | 215.20 | 91.60 | 77.84 | 147.50 | 17.49 | 0.23 | 4.77 | 13.32 | 439.00 | 59.15 | 120.99 | 14.26 | 56.49 | 12.05 | 1.10 | 12.20 | 2.11 | 13.31 | 2.79 | 8.22 | 1.14 | 6.74 | 0.98 | 4.85 | 1.09 |  | 43.26 | 5.03 | 0.76 | -8.70 |
|  | 245.20 | 46.90 | 37.74 | 135.00 | 17.77 | 0.52 | 19.79 | 26.94 | 212.00 | 23.00 | 46.35 | 5.90 | 21.83 | 5.19 | 0.43 | 5.23 | 1.03 | 6.69 | 1.32 | 4.03 | 0.63 | 4.19 | 0.63 | 3.20 | 2.15 |  | 21.37 | 11.70 |  |  |
|  | 228.30 | 118.10 | 33.63 | 128.60 | 18.48 | 0.55 | 8.29 | 19.89 | 397.00 | 28.52 | 58.81 | 7.34 | 27.44 | 5.90 | 0.81 | 5.88 | 1.03 | 6.27 | 1.20 | 3.52 | 0.50 | 3.22 | 0.47 | 4.32 | 1.51 |  | 23.96 | 5.70 | 0.76 | -7.90 |
|  | 233.70 | 88.10 | 31.47 | 122.50 | 20.95 | 0.16 | 9.55 | 18.26 | 334.00 | 30.56 | 62.94 | 7.78 | 29.31 | 6.19 | 0.76 | 5.99 | 1.04 | 6.11 | 1.14 | 3.27 | 0.46 | 2.96 | 0.43 | 4.08 | 1.86 |  | 25.25 | 3.34 | 0.77 | -9.00 |
|  | 222.60 | 87.60 | 28.08 | 152.80 | 21.38 | 0.36 | 9.45 | 16.68 | 325.00 | 29.21 | 59.71 | 7.38 | 28.03 | 5.89 | 0.75 | 5.77 | 0.98 | 5.66 | 1.03 | 2.89 | 0.40 | 2.56 | 0.37 | 4.90 | 1.79 |  | 22.86 | 7.70 |  |  |
|  | 182.50 | 66.60 | 30.20 | 130.60 | 16.78 | 0.18 | 7.54 | 9.93 | 305.00 | 26.04 | 53.75 | 6.66 | 25.10 | 5.42 | 0.65 | 5.44 | 0.96 | 5.78 | 1.10 | 3.18 | 0.45 | 2.85 | 0.41 | 4.30 | 1.44 |  | 24.72 | 5.05 | 0.77 | -9.40 |
|  | 198.60 | 86.90 | 36.71 | 170.70 | 22.98 | 1.06 | 5.53 | 22.09 | 387.00 | 44.90 | 91.67 | 11.16 | 42.58 | 8.74 | 0.95 | 8.31 | 1.33 | 7.39 | 1.37 | 3.88 | 0.53 | 3.20 | 0.46 | 5.53 | 1.39 |  | 34.36 | 6.21 | 0.76 | -8.70 |
|  | 168.90 | 141.40 | 33.75 | 213.70 | 22.79 | 1.84 | 4.05 | 20.15 | 535.00 | 20.45 | 36.09 | 4.60 | 19.13 | 4.66 | 0.44 | 5.27 | 0.98 | 6.27 | 1.26 | 3.69 | 0.54 | 3.47 | 0.53 | 6.48 | 1.18 |  | 13.02 | 4.46 | 0.74 | -8.80 |
|  | 190.80 | 127.50 | 34.53 | 246.60 | 16.70 | 2.68 |  | 10.84 | 710.30 | 74.51 | 152.30 | 18.31 | 69.43 | 12.27 | 1.67 | 11.81 | 1.39 | 6.78 | 1.21 | 3.39 | 0.45 | 2.96 | 0.43 | 6.48 | 1.28 | 33.07 | 36.77 | 4.18 |  |  |
|  | 193.20 | 127.90 | 34.25 | 216.30 | 17.10 | 1.25 |  | 10.90 | 708.70 | 76.15 | 156.20 | 18.63 | 70.65 | 12.55 | 1.67 | 11.91 | 1.39 | 6.75 | 1.18 | 3.29 | 0.44 | 2.83 | 0.42 | 5.65 | 1.28 | 27.81 | 31.11 | 2.69 |  |  |
|  | 191.00 | 127.20 | 33.68 | 215.90 | 16.90 | 1.13 |  | 11.00 | 713.50 | 77.32 | 158.80 | 18.98 | 71.73 | 12.61 | 1.67 | 12.31 | 1.40 | 6.65 | 1.18 | 3.29 | 0.43 | 2.79 | 0.42 | 5.49 | 1.26 | 27.60 | 30.93 | 3.09 |  |  |
|  | 258.40 | 103.60 | 50.02 | 295.50 | 27.19 | 2.02 |  | 19.38 | 486.80 | 74.98 | 155.00 | 19.00 | 73.24 | 13.60 | 1.60 | 13.85 | 1.78 | 9.48 | 1.76 | 4.95 | 0.66 | 4.18 | 0.60 | 7.58 | 2.12 | 20.34 | 35.48 | 2.61 |  |  |
|  | 189.30 | 128.90 | 43.66 | 89.26 | 23.62 | 0.55 |  | 10.92 | 438.00 | 97.44 | 206.20 | 23.25 | 87.12 | 15.37 | 1.73 | 14.05 | 1.68 | 8.68 | 1.57 | 4.46 | 0.62 | 4.14 | 0.60 | 2.54 | 3.37 | 21.75 | 37.24 | 4.09 |  |  |
|  | 317.00 | 108.00 | 18.70 | 106.00 | 39.10 |  |  | 18.40 | 299.00 | 38.20 | 76.50 | 8.80 | 31.20 | 5.73 | 0.72 | 4.79 | 0.71 | 3.77 | 0.70 | 1.80 | 0.24 | 1.43 | 0.21 | 3.27 | 3.69 | 26.40 | 21.90 | 13.50 | 0.74 | -7.77 |
|  | 263.00 | 113.00 | 33.10 | 205.00 | 14.30 |  |  | 19.00 | 469.00 | 48.50 | 93.60 | 10.70 | 39.20 | 7.11 | 1.22 | 6.54 | 1.03 | 5.91 | 1.25 | 3.47 | 0.53 | 3.48 | 0.57 | 5.75 | 1.78 | 20.20 | 20.50 | 6.40 | 0.74 | -7.59 |
|  | 164.00 | 266.00 | 24.80 | 189.00 | 11.60 |  |  | 11.10 | 886.00 | 49.60 | 87.40 | 9.44 | 32.80 | 5.49 | 1.11 | 5.17 | 0.78 | 4.37 | 0.90 | 2.41 | 0.33 | 2.03 | 0.32 | 5.21 | 1.55 | 23.60 | 20.40 | 4.49 | 0.72 | -4.40 |
|  | 113.00 | 208.00 | 22.40 | 161.00 | 9.49 |  |  | 5.31 | 454.00 | 46.60 | 89.20 | 10.20 | 37.30 | 6.60 | 1.22 | 5.73 | 0.84 | 4.37 | 0.86 | 2.23 | 0.31 | 1.99 | 0.31 | 4.92 | 0.92 | 19.50 | 17.70 | 3.19 | 0.72 | -6.70 |
|  | 138.00 | 176.00 | 20.50 | 123.00 | 9.84 |  |  | 5.71 | 647.00 | 31.00 | 58.50 | 6.80 | 24.70 | 4.82 | 1.22 | 4.45 | 0.70 | 3.93 | 0.80 | 2.15 | 0.30 | 1.90 | 0.30 | 3.76 | 1.08 | 26.50 | 10.80 | 7.84 | 0.72 | -7.00 |
|  | 119.00 | 227.00 | 20.70 | 151.00 | 10.40 |  |  | 5.02 | 519.00 | 35.70 | 69.70 | 8.00 | 29.30 | 5.32 | 1.29 | 4.88 | 0.74 | 4.08 | 0.78 | 2.14 | 0.29 | 1.83 | 0.29 | 4.47 | 0.91 | 21.50 | 13.30 | 2.30 | 0.72 | -6.70 |
|  | 129.00 | 148.00 | 17.70 | 163.00 | 9.78 |  |  | 6.44 | 586.00 | 37.30 | 72.20 | 8.44 | 30.70 | 5.53 | 1.23 | 4.99 | 0.69 | 3.70 | 0.71 | 1.82 | 0.24 | 1.52 | 0.23 | 5.09 | 1.03 | 23.40 | 13.10 | 2.56 | 0.73 | -6.80 |
|  | 132.00 | 142.00 | 21.80 | 157.00 | 10.00 |  |  | 6.66 | 576.00 | 38.10 | 74.50 | 8.89 | 32.40 | 6.09 | 1.19 | 5.23 | 0.80 | 4.24 | 0.83 | 2.16 | 0.29 | 1.78 | 0.27 | 4.96 | 1.19 | 24.50 | 15.60 | 3.09 | 0.73 | -7.20 |
|  | 130.00 | 156.00 | 18.90 | 157.00 | 9.20 |  |  | 6.01 | 642.00 | 34.70 | 69.10 | 7.88 | 29.20 | 5.50 | 1.27 | 5.05 | 0.72 | 3.79 | 0.72 | 1.88 | 0.25 | 1.50 | 0.24 | 4.62 | 0.94 | 24.40 | 13.80 | 2.32 | 0.73 | -7.60 |
|  | 121.00 | 162.00 | 23.20 | 167.00 | 9.24 |  |  | 4.22 | 646.00 | 36.30 | 71.40 | 8.32 | 30.10 | 5.57 | 1.22 | 5.00 | 0.77 | 4.36 | 0.87 | 2.39 | 0.35 | 2.25 | 0.35 | 5.18 | 0.91 | 24.00 | 14.50 | 2.36 |  |  |
|  | 140.00 | 142.00 | 20.50 | 220.00 | 13.10 |  |  | 9.92 | 505.00 | 37.10 | 72.50 | 8.39 | 30.60 | 5.61 | 1.10 | 5.16 | 0.75 | 3.93 | 0.78 | 2.01 | 0.27 | 1.69 | 0.28 | 6.63 | 1.46 | 21.10 | 14.80 | 3.93 | 0.73 | -6.90 |
|  | 129.00 | 129.00 | 24.20 | 137.00 | 9.28 |  |  | 6.27 | 632.00 | 42.20 | 83.30 | 9.34 | 34.00 | 6.28 | 1.21 | 5.74 | 0.88 | 4.95 | 0.95 | 2.47 | 0.34 | 2.08 | 0.32 | 4.07 | 0.78 | 24.00 | 15.60 | 2.45 | 0.73 | -7.20 |
|  | 123.00 | 142.00 | 24.80 | 193.00 | 10.50 |  |  | 4.94 | 674.00 | 42.50 | 82.00 | 9.57 | 35.80 | 6.58 | 1.26 | 5.93 | 0.88 | 4.82 | 0.95 | 2.60 | 0.36 | 2.34 | 0.36 | 6.02 | 0.80 | 25.60 | 16.10 | 1.68 | 0.73 | -7.00 |
|  | 118.00 | 138.00 | 44.70 | 135.00 | 9.42 |  |  | 8.36 | 202.00 | 17.70 | 39.50 | 5.28 | 22.20 | 5.76 | 1.18 | 6.48 | 1.20 | 7.64 | 1.69 | 4.70 | 0.70 | 4.54 | 0.69 | 3.96 | 0.86 | 14.50 | 7.81 | 2.02 | 0.73 | -7.20 |
|  | 110.00 | 149.00 | 32.50 | 152.00 | 7.34 |  |  | 5.26 | 200.00 | 24.50 | 52.60 | 6.59 | 26.60 | 5.65 | 1.45 | 5.66 | 0.93 | 5.62 | 1.19 | 3.30 | 0.50 | 3.33 | 0.54 | 4.35 | 0.77 | 14.80 | 11.50 | 2.25 | 0.72 | -6.10 |
|  | 142.00 | 148.00 | 34.00 | 164.00 | 7.55 |  |  | 3.85 | 249.00 | 22.70 | 49.40 | 6.43 | 26.00 | 5.76 | 1.44 | 5.77 | 0.97 | 5.56 | 1.20 | 3.37 | 0.50 | 3.32 | 0.53 | 4.99 | 0.75 | 14.70 | 10.30 | 2.60 | 0.73 | -5.90 |
|  | 123.00 | 123.00 | 63.50 | 158.00 | 10.70 |  |  | 10.20 | 188.00 | 22.20 | 48.10 | 6.22 | 26.00 | 7.29 | 1.04 | 8.75 | 1.74 | 11.10 | 2.37 | 6.72 | 0.99 | 6.31 | 0.94 | 4.52 | 0.95 | 13.90 | 9.47 | 2.44 | 0.73 | -6.90 |
|  | 126.00 | 203.00 | 33.30 | 146.00 | 11.10 |  |  | 9.43 | 595.00 | 32.60 | 66.30 | 8.16 | 31.60 | 6.72 | 1.35 | 6.22 | 1.01 | 6.32 | 1.29 | 3.54 | 0.52 | 3.35 | 0.50 | 4.13 | 1.02 | 19.10 | 12.30 | 2.92 | 0.73 | -10.40 |
|  | 124.00 | 187.00 | 27.10 | 129.00 | 9.14 |  |  | 9.88 | 522.00 | 31.80 | 62.50 | 7.44 | 27.90 | 5.63 | 1.29 | 5.14 | 0.82 | 5.09 | 1.04 | 2.93 | 0.44 | 2.78 | 0.44 | 3.70 | 0.88 | 21.70 | 13.30 | 2.55 | 0.73 | -9.70 |
|  | 101.00 | 183.00 | 27.10 | 117.00 | 8.90 |  |  | 6.60 | 464.00 | 32.70 | 63.70 | 7.54 | 27.90 | 5.53 | 1.25 | 5.07 | 0.82 | 5.01 | 1.03 | 2.88 | 0.43 | 2.73 | 0.42 | 3.42 | 0.82 | 18.10 | 15.20 | 2.64 |  |  |
|  | 113.00 | 187.00 | 26.70 | 117.00 | 11.90 |  |  | 5.27 | 497.00 | 37.80 | 72.70 | 8.37 | 30.70 | 5.78 | 1.36 | 5.30 | 0.82 | 5.02 | 1.01 | 2.88 | 0.43 | 2.67 | 0.41 | 3.47 | 1.03 | 20.30 | 13.80 | 2.73 |  |  |
|  | 125.00 | 176.00 | 26.90 | 131.00 | 9.15 |  |  | 8.83 | 549.00 | 31.30 | 62.10 | 7.33 | 27.50 | 5.47 | 1.27 | 5.04 | 0.80 | 5.02 | 1.02 | 2.90 | 0.44 | 2.87 | 0.43 | 3.73 | 0.84 | 24.80 | 13.10 | 2.72 | 0.73 | -9.80 |
|  | 108.00 | 179.00 | 27.30 | 108.00 | 9.19 |  |  | 7.41 | 456.00 | 30.50 | 60.10 | 7.18 | 27.20 | 5.51 | 1.24 | 5.09 | 0.82 | 5.12 | 1.03 | 2.92 | 0.43 | 2.84 | 0.43 | 3.39 | 0.86 | 18.90 | 15.40 | 2.60 |  |  |
|  | 140.00 | 184.00 | 30.40 | 112.00 | 11.70 |  |  | 6.87 | 583.00 | 33.60 | 67.70 | 8.17 | 31.40 | 6.49 | 1.33 | 5.99 | 0.96 | 5.82 | 1.18 | 3.28 | 0.47 | 3.00 | 0.46 | 3.37 | 0.97 | 18.30 | 12.70 | 2.55 | 0.73 | -10.30 |
|  | 129.00 | 194.00 | 27.90 | 110.00 | 9.31 |  |  | 7.72 | 418.00 | 31.40 | 61.70 | 7.34 | 27.50 | 5.62 | 1.30 | 5.09 | 0.84 | 5.19 | 1.06 | 3.00 | 0.45 | 2.94 | 0.45 | 3.29 | 0.88 | 21.60 | 13.90 | 2.99 |  |  |
|  | 136.00 | 189.00 | 32.40 | 118.00 | 11.20 |  |  | 9.39 | 563.00 | 35.10 | 71.10 | 8.60 | 33.00 | 6.96 | 1.36 | 6.32 | 1.00 | 6.24 | 1.23 | 3.40 | 0.48 | 3.08 | 0.47 | 3.44 | 0.93 | 16.40 | 12.60 | 2.33 |  |  |
|  | 131.00 | 197.00 | 26.70 | 123.00 | 9.24 |  |  | 8.34 | 531.00 | 30.40 | 59.80 | 7.09 | 26.80 | 5.39 | 1.26 | 4.98 | 0.80 | 4.97 | 1.01 | 2.82 | 0.42 | 2.73 | 0.43 | 3.54 | 0.83 | 20.90 | 12.80 | 2.40 |  |  |
|  | 123.00 | 192.00 | 27.30 | 153.00 | 9.14 |  |  | 9.79 | 513.00 | 31.30 | 61.80 | 7.27 | 27.40 | 5.52 | 1.27 | 5.02 | 0.82 | 5.09 | 1.06 | 2.98 | 0.44 | 2.89 | 0.45 | 4.25 | 0.82 | 27.40 | 12.80 | 2.55 |  |  |
|  | 183.00 | 97.30 | 34.20 | 119.00 | 9.07 |  |  | 7.25 | 475.00 | 44.20 | 84.60 | 9.70 | 33.40 | 6.85 | 0.98 | 6.58 | 1.03 | 6.13 | 1.24 | 3.44 | 0.53 | 3.34 | 0.51 | 4.30 | 0.95 | 32.20 | 25.50 | 4.60 |  |  |
|  | 188.00 | 89.40 | 36.90 | 117.00 | 8.56 |  |  | 7.41 | 480.00 | 37.70 | 73.70 | 8.59 | 29.90 | 6.38 | 0.91 | 6.33 | 1.04 | 6.37 | 1.33 | 3.77 | 0.56 | 3.55 | 0.54 | 4.59 | 1.10 | 32.60 | 27.80 | 6.05 | 0.75 | -11.10 |
|  | 184.00 | 97.80 | 38.30 | 128.00 | 9.04 |  |  | 7.44 | 572.00 | 47.20 | 88.90 | 10.20 | 35.50 | 7.34 | 1.03 | 7.20 | 1.14 | 6.93 | 1.42 | 3.91 | 0.59 | 3.71 | 0.58 | 4.58 | 1.08 | 30.80 | 22.20 | 4.79 |  |  |
|  | 183.00 | 89.90 | 34.50 | 125.00 | 9.02 |  |  | 7.81 | 474.00 | 40.60 | 78.00 | 9.09 | 31.90 | 6.69 | 0.91 | 6.52 | 1.03 | 6.28 | 1.31 | 3.56 | 0.54 | 3.42 | 0.52 | 4.40 | 1.00 | 31.60 | 24.20 | 5.12 |  |  |
|  | 202.00 | 95.80 | 40.60 | 114.00 | 9.90 |  |  | 8.87 | 509.00 | 40.40 | 77.40 | 8.79 | 30.30 | 6.15 | 0.95 | 6.32 | 1.08 | 6.89 | 1.44 | 4.11 | 0.64 | 4.06 | 0.62 | 4.19 | 1.45 | 27.60 | 21.30 | 6.87 |  |  |
|  | 211.00 | 92.70 | 42.20 | 108.00 | 9.09 |  |  | 9.09 | 497.00 | 39.40 | 75.40 | 8.73 | 29.70 | 6.15 | 0.94 | 6.29 | 1.07 | 6.84 | 1.47 | 4.33 | 0.69 | 4.45 | 0.69 | 4.14 | 1.25 | 30.60 | 22.40 | 5.64 | 0.75 | -11.30 |
|  | 190.00 | 90.50 | 39.70 | 114.00 | 9.73 |  |  | 9.06 | 466.00 | 42.50 | 81.50 | 9.53 | 33.20 | 7.25 | 0.94 | 7.02 | 1.15 | 7.05 | 1.44 | 3.99 | 0.63 | 3.98 | 0.62 | 4.38 | 1.25 | 31.00 | 25.60 | 5.14 |  |  |
|  | 170.00 | 116.00 | 29.40 | 107.00 | 8.55 |  |  | 9.07 | 613.00 | 38.20 | 72.40 | 8.23 | 28.30 | 5.52 | 1.10 | 5.37 | 0.84 | 5.09 | 1.06 | 3.01 | 0.45 | 2.83 | 0.44 | 3.76 | 0.92 | 25.50 | 17.60 | 4.05 |  |  |
|  | 182.00 | 97.30 | 34.80 | 104.00 | 8.11 |  |  | 8.25 | 534.00 | 45.30 | 83.80 | 9.49 | 32.40 | 6.38 | 1.00 | 6.14 | 0.98 | 5.88 | 1.21 | 3.44 | 0.52 | 3.25 | 0.50 | 3.84 | 1.05 | 31.60 | 23.10 | 5.11 |  |  |
|  | 163.00 | 130.00 | 28.00 | 110.00 | 8.46 |  |  | 8.34 | 782.00 | 36.30 | 69.30 | 7.76 | 27.50 | 5.13 | 1.03 | 4.82 | 0.77 | 4.84 | 1.00 | 2.97 | 0.44 | 2.88 | 0.44 | 3.61 | 1.05 | 26.70 | 17.90 | 3.89 |  |  |
|  | 164.00 | 128.00 | 33.80 | 101.00 | 9.90 |  |  | 5.51 | 756.00 | 38.10 | 73.30 | 8.47 | 29.60 | 5.98 | 1.28 | 5.87 | 0.96 | 5.80 | 1.21 | 3.46 | 0.53 | 3.26 | 0.52 | 3.59 | 1.03 | 26.40 | 18.70 | 3.84 | 0.74 | -10.40 |
|  | 157.00 | 126.00 | 28.00 | 103.00 | 9.44 |  |  | 7.00 | 669.00 | 31.90 | 61.50 | 7.20 | 25.40 | 5.42 | 1.23 | 5.21 | 0.86 | 5.21 | 1.06 | 2.97 | 0.45 | 2.87 | 0.43 | 3.64 | 1.00 | 23.80 | 15.70 | 2.47 |  |  |
|  | 153.00 | 129.00 | 27.00 | 127.00 | 8.67 |  |  | 6.60 | 675.00 | 25.40 | 49.90 | 5.94 | 21.40 | 4.90 | 1.22 | 4.89 | 0.82 | 5.04 | 1.03 | 2.79 | 0.44 | 2.74 | 0.42 | 4.12 | 0.83 | 23.80 | 13.00 | 2.63 | 0.73 | -11.00 |
|  | 148.00 | 141.00 | 24.40 | 103.00 | 8.20 |  |  | 5.39 | 700.00 | 37.50 | 70.90 | 8.05 | 28.60 | 5.29 | 1.18 | 4.68 | 0.74 | 4.42 | 0.88 | 2.52 | 0.38 | 2.42 | 0.37 | 3.52 | 0.92 | 26.90 | 17.20 | 3.06 |  |  |
|  | 160.00 | 126.00 | 36.90 | 107.00 | 9.71 |  |  | 5.47 | 733.00 | 37.20 | 71.00 | 8.29 | 30.30 | 6.35 | 1.13 | 6.09 | 1.01 | 6.42 | 1.31 | 3.76 | 0.55 | 3.53 | 0.55 | 3.82 | 1.14 | 28.10 | 20.80 | 4.51 |  |  |
|  | 147.00 | 134.00 | 31.70 | 105.00 | 8.72 |  |  | 4.37 | 628.00 | 35.30 | 70.60 | 7.87 | 28.80 | 5.75 | 1.11 | 5.41 | 0.88 | 5.51 | 1.14 | 3.26 | 0.48 | 3.11 | 0.47 | 3.54 | 0.99 | 26.90 | 18.90 | 4.04 |  |  |
|  | 149.00 | 134.00 | 33.40 | 98.10 | 9.05 |  |  | 5.08 | 604.00 | 28.00 | 54.60 | 6.54 | 24.70 | 5.41 | 1.12 | 5.19 | 0.87 | 5.68 | 1.20 | 3.39 | 0.49 | 3.25 | 0.50 | 3.47 | 1.00 | 28.60 | 17.10 | 4.03 |  |  |
|  | 153.00 | 137.00 | 33.30 | 102.00 | 9.47 |  |  | 6.00 | 629.00 | 25.40 | 50.00 | 6.01 | 22.90 | 5.13 | 1.13 | 4.98 | 0.86 | 5.64 | 1.16 | 3.30 | 0.50 | 3.12 | 0.49 | 3.54 | 1.12 | 23.80 | 14.40 | 2.99 | 0.74 | -10.60 |
|  | 155.00 | 139.00 | 25.70 | 91.50 | 9.30 |  |  | 6.83 | 665.00 | 32.40 | 64.90 | 7.11 | 25.90 | 5.08 | 1.11 | 4.79 | 0.77 | 4.73 | 0.95 | 2.72 | 0.40 | 2.62 | 0.40 | 3.24 | 1.04 | 26.00 | 16.80 | 3.75 |  |  |
|  | 176.00 | 157.00 | 30.10 | 104.00 | 8.71 |  |  | 9.68 | 603.00 | 33.30 | 65.10 | 7.53 | 27.60 | 5.63 | 1.12 | 5.17 | 0.86 | 5.25 | 1.09 | 3.10 | 0.46 | 3.00 | 0.46 | 3.72 | 1.09 | 25.10 | 17.80 | 5.52 |  |  |
|  | 197.00 | 159.00 | 43.10 | 111.00 | 9.40 |  |  | 5.95 | 638.00 | 33.80 | 67.70 | 7.72 | 29.50 | 6.42 | 1.28 | 6.43 | 1.11 | 7.11 | 1.48 | 4.28 | 0.63 | 4.01 | 0.61 | 4.16 | 1.31 | 31.40 | 18.20 | 6.18 |  |  |
|  | 162.00 | 140.00 | 34.70 | 116.00 | 9.07 |  |  | 10.60 | 724.00 | 37.40 | 69.30 | 8.27 | 30.20 | 5.94 | 1.14 | 5.56 | 0.91 | 5.79 | 1.20 | 3.48 | 0.52 | 3.42 | 0.53 | 4.10 | 1.43 | 30.20 | 19.30 | 4.48 | 0.74 | -10.20 |
|  | 142.00 | 137.00 | 27.60 | 97.70 | 7.86 |  |  | 5.95 | 613.00 | 29.80 | 57.60 | 6.64 | 24.40 | 4.91 | 1.06 | 4.68 | 0.78 | 4.91 | 0.99 | 2.80 | 0.41 | 2.68 | 0.41 | 3.42 | 0.85 | 27.30 | 15.10 | 3.29 | 0.73 | -10.10 |
|  | 196.00 | 71.00 | 28.40 | 115.00 | 7.95 |  |  | 4.96 | 503.00 | 33.20 | 62.10 | 6.91 | 22.70 | 4.41 | 0.90 | 4.40 | 0.72 | 4.56 | 0.98 | 2.92 | 0.48 | 3.16 | 0.51 | 4.22 | 1.12 | 22.20 | 23.20 | 5.75 |  | -10.60 |
|  | 180.00 | 124.00 | 32.40 | 109.00 | 8.45 |  |  | 7.73 | 582.00 | 32.00 | 61.30 | 7.04 | 25.30 | 5.16 | 1.06 | 5.04 | 0.85 | 5.38 | 1.13 | 3.27 | 0.50 | 3.27 | 0.51 | 3.99 | 1.19 | 26.60 | 18.90 | 5.26 |  |  |
|  | 200.00 | 167.00 | 45.10 | 96.40 | 9.64 |  |  | 8.85 | 737.00 | 45.20 | 68.90 | 9.73 | 34.60 | 7.58 | 1.76 | 8.02 | 1.35 | 8.29 | 1.67 | 4.52 | 0.66 | 4.08 | 0.61 | 3.44 | 1.04 | 22.60 | 15.30 | 4.59 | 0.73 | -10.80 |
|  | 172.00 | 63.60 | 22.70 | 98.10 | 6.54 |  |  | 4.47 | 329.00 | 25.60 | 47.90 | 5.52 | 19.30 | 3.84 | 0.62 | 3.59 | 0.59 | 3.75 | 0.79 | 2.32 | 0.36 | 2.43 | 0.37 | 3.51 | 1.08 | 19.40 | 24.30 | 5.46 |  | -10.10 |
|  | 181.00 | 100.00 | 46.20 | 83.20 | 6.31 |  |  | 6.37 | 484.00 | 42.10 | 82.20 | 8.79 | 31.00 | 6.59 | 1.35 | 6.62 | 1.16 | 7.39 | 1.52 | 4.40 | 0.66 | 4.37 | 0.69 | 3.29 | 1.04 | 34.80 | 23.80 | 5.36 |  |  |
|  | 113.00 | 156.00 | 34.00 | 97.90 | 11.40 |  |  | 2.40 | 727.00 | 33.10 | 64.50 | 8.36 | 31.50 | 6.86 | 1.41 | 6.62 | 1.09 | 6.51 | 1.30 | 3.55 | 0.52 | 3.10 | 0.47 | 3.04 | 0.88 | 16.70 | 9.82 | 1.85 | 0.73 | -11.20 |
|  | 128.00 | 158.00 | 35.00 | 160.00 | 11.70 |  |  | 6.55 | 680.00 | 36.20 | 73.40 | 8.97 | 33.30 | 7.06 | 1.48 | 6.69 | 1.11 | 6.88 | 1.37 | 3.75 | 0.55 | 3.33 | 0.48 | 4.70 | 0.93 | 17.40 | 13.00 | 2.40 | 0.73 | -11.20 |
|  | 127.00 | 156.00 | 40.20 | 128.00 | 11.90 |  |  | 8.60 | 698.00 | 36.50 | 74.50 | 9.34 | 35.50 | 8.11 | 1.55 | 7.83 | 1.31 | 7.93 | 1.62 | 4.35 | 0.64 | 3.93 | 0.58 | 3.96 | 0.96 | 18.30 | 10.60 | 2.47 |  |  |
|  | 127.00 | 158.00 | 36.20 | 110.00 | 11.90 |  |  | 8.18 | 892.00 | 39.80 | 79.30 | 9.56 | 35.70 | 7.74 | 1.54 | 7.43 | 1.20 | 7.21 | 1.43 | 3.76 | 0.55 | 3.30 | 0.48 | 3.31 | 0.80 | 14.50 | 11.70 | 1.18 |  |  |
|  | 121.00 | 165.00 | 37.50 | 127.00 | 11.80 |  |  | 6.04 | 708.00 | 38.10 | 76.30 | 9.44 | 35.70 | 7.82 | 1.56 | 7.58 | 1.24 | 7.47 | 1.49 | 4.03 | 0.57 | 3.50 | 0.50 | 3.80 | 0.80 | 14.50 | 11.90 | 1.23 | 0.73 | -11.10 |
|  | 113.00 | 166.00 | 30.50 | 105.00 | 10.90 |  |  | 5.22 | 653.00 | 29.60 | 59.90 | 7.48 | 28.30 | 6.35 | 1.43 | 6.17 | 0.99 | 6.03 | 1.21 | 3.23 | 0.46 | 2.88 | 0.42 | 3.21 | 0.78 | 17.00 | 9.58 | 1.20 |  |  |
|  | 131.00 | 166.00 | 37.00 | 90.80 | 9.99 |  |  | 5.88 | 634.00 | 35.50 | 70.80 | 8.35 | 32.40 | 6.74 | 1.29 | 6.31 | 1.04 | 6.62 | 1.36 | 3.83 | 0.56 | 3.48 | 0.52 | 2.93 | 1.03 | 19.40 | 11.30 | 3.19 |  |  |
|  | 102.00 | 179.00 | 34.80 | 108.00 | 9.97 |  |  | 4.47 | 694.00 | 36.50 | 68.70 | 8.62 | 33.70 | 7.09 | 1.42 | 6.67 | 1.09 | 6.73 | 1.33 | 3.60 | 0.51 | 3.07 | 0.46 | 3.29 | 0.75 | 18.60 | 11.40 | 1.19 |  |  |
|  | 320.00 | 74.61 | 26.62 | 211.10 | 24.50 | 154.90 | 6.43 | 4.76 | 601.00 | 63.47 | 77.04 | 13.71 | 48.69 | 8.61 | 1.24 | 7.22 | 0.94 | 5.78 | 1.13 | 3.00 | 0.43 | 2.56 | 0.36 | 5.82 | 2.15 |  | 17.97 | 3.53 | 0.76 | -8.40 |
|  | 262.00 | 119.39 | 39.67 | 235.70 | 23.61 | 111.50 | 15.43 | 7.92 | 653.00 | 70.93 | 119.83 | 14.17 | 57.82 | 10.96 | 1.72 | 10.78 | 1.28 | 8.81 | 2.21 | 6.39 | 0.80 | 5.59 | 0.79 | 7.45 | 2.56 |  | 28.20 | 5.19 | 0.74 | -10.40 |
|  | 260.00 | 116.44 | 24.46 | 272.40 | 21.67 | 188.20 | 4.54 | 3.89 | 976.00 | 60.90 | 101.10 | 13.23 | 48.10 | 8.61 | 1.39 | 7.76 | 0.85 | 5.23 | 1.07 | 3.02 | 0.38 | 2.37 | 0.36 | 6.64 | 1.52 |  | 21.80 | 3.46 | 0.74 | -9.70 |
|  | 295.00 | 78.81 | 29.35 | 204.90 | 18.61 | 82.91 | 6.06 | 4.96 | 633.00 | 35.50 | 71.27 | 8.26 | 29.20 | 5.61 | 0.84 | 5.24 | 0.81 | 5.41 | 1.23 | 3.41 | 0.47 | 2.71 | 0.37 | 5.16 | 1.80 |  | 16.86 | 3.46 | 0.76 | -9.10 |
|  | 292.00 | 92.12 | 22.06 | 264.60 | 25.51 | 167.90 | 9.83 | 14.22 | 585.00 | 46.15 | 97.61 | 11.32 | 42.79 | 8.00 | 1.04 | 6.65 | 0.74 | 4.65 | 0.91 | 2.47 | 0.32 | 1.95 | 0.30 | 6.21 | 2.16 |  | 20.93 | 3.37 | 0.76 | -9.00 |
|  | 227.00 | 195.20 | 28.45 | 319.80 | 28.15 | 131.90 | 7.06 | 6.38 | 941.00 | 65.90 | 130.80 | 14.46 | 54.09 | 9.71 | 1.57 | 8.14 | 0.93 | 5.78 | 1.18 | 3.04 | 0.41 | 2.07 | 0.30 | 7.65 | 2.05 |  | 22.30 | 3.87 | 0.73 | -9.30 |
|  | 245.00 | 192.60 | 25.59 | 332.10 | 29.21 | 40.99 | 7.92 | 9.58 | 693.00 | 66.02 | 128.50 | 14.38 | 54.90 | 9.01 | 1.31 | 8.07 | 0.84 | 5.03 | 1.03 | 2.85 | 0.32 | 1.85 | 0.25 | 7.40 | 2.76 |  | 21.53 | 3.07 | 0.73 | -8.90 |
|  | 129.70 | 135.00 | 24.47 | 437.00 | 23.71 | 3.29 | 1.49 | 1.59 | 1826.00 | 47.35 | 69.65 | 10.73 | 40.01 | 7.71 | 1.79 | 6.97 | 1.04 | 5.85 | 1.06 | 3.05 | 0.41 | 2.77 | 0.40 | 11.80 | 1.31 |  | 11.56 | 1.09 | 0.72 | -8.40 |
|  | 215.40 | 220.80 | 29.76 | 264.90 | 19.03 | 3.64 | 3.53 | 4.26 | 696.00 | 59.87 | 112.70 | 13.43 | 50.08 | 8.62 | 1.46 | 7.23 | 1.14 | 5.57 | 1.12 | 3.22 | 0.42 | 2.89 | 0.39 | 7.09 | 1.61 |  | 24.66 | 2.45 | 0.73 | -8.30 |
|  | 170.00 | 144.60 | 28.87 | 296.90 | 25.56 | 11.39 | 3.40 | 3.41 | 650.00 | 33.62 | 60.94 | 7.28 | 28.31 | 5.73 | 1.16 | 5.86 | 0.88 | 5.49 | 1.15 | 3.05 | 0.32 | 1.44 | 0.22 | 8.27 | 1.75 |  | 15.42 | 2.66 | 0.73 | -7.70 |
|  | 263.00 | 117.00 | 29.30 | 181.00 | 29.22 | 0.72 | 5.17 | 11.60 | 766.00 | 59.55 | 119.40 | 13.78 | 50.80 | 9.42 | 1.13 | 8.37 | 1.19 | 6.13 | 1.11 | 3.29 | 0.46 | 2.99 | 0.45 | 5.47 | 1.63 |  | 36.38 | 3.17 |  |  |
|  | 220.00 | 137.00 | 36.75 | 260.00 | 30.26 | 2.15 | 3.37 | 12.38 | 794.00 | 64.82 | 127.90 | 14.64 | 54.49 | 9.87 | 1.43 | 8.99 | 1.31 | 7.16 | 1.40 | 4.32 | 0.63 | 4.01 | 0.60 | 7.45 | 1.28 |  | 32.75 | 1.99 |  |  |
|  | 274.00 | 120.00 | 26.48 | 209.00 | 29.54 | 0.62 | 4.68 | 7.66 | 906.00 | 56.76 | 112.70 | 12.68 | 46.68 | 8.32 | 1.32 | 7.51 | 1.06 | 5.58 | 1.03 | 3.11 | 0.44 | 2.88 | 0.43 | 6.07 | 1.57 |  | 30.51 | 3.25 |  |  |
|  | 248.90 | 162.00 | 42.53 | 468.30 | 45.29 | 323.60 | 12.90 | 14.20 | 193.00 | 75.86 | 154.20 | 17.02 | 63.30 | 12.10 | 1.27 | 11.40 | 1.31 | 8.34 | 1.71 | 4.64 | 0.57 | 3.29 | 0.49 | 10.50 | 2.48 |  | 22.11 | 1.69 | 0.74 | -7.30 |
|  | 393.00 | 97.00 | 21.00 | 41.00 | 20.90 |  |  |  | 170.00 | 19.00 | 28.00 | 4.00 | 15.00 | 3.30 | 0.19 | 4.20 | 0.87 | 4.30 | 0.56 | 1.20 | 0.15 | 0.83 | 0.11 | 2.10 | 4.60 |  | 7.00 | 10.70 | 0.79 | -9.82 |
|  | 393.00 | 79.00 | 16.00 | 45.00 | 21.50 |  |  |  | 164.00 | 16.00 | 24.00 | 3.20 | 12.00 | 2.60 | 0.18 | 3.30 | 0.71 | 3.70 | 0.48 | 0.90 | 0.11 | 0.63 | 0.09 | 2.30 | 4.80 |  | 8.00 | 9.30 | 0.81 | -10.05 |
|  | 391.00 | 103.00 | 19.00 | 42.00 | 21.80 |  |  |  | 168.00 | 11.00 | 23.00 | 2.90 | 13.00 | 1.80 | 0.13 | 2.90 | 0.64 | 3.20 | 0.42 | 0.80 | 0.10 | 0.59 | 0.08 | 2.20 | 4.60 |  | 8.00 | 9.40 |  |  |
|  | 460.00 | 89.00 | 15.00 | 43.00 | 28.90 |  |  |  | 128.00 | 18.00 | 34.00 | 4.20 | 14.00 | 2.80 | 0.16 | 2.80 | 0.66 | 3.20 | 0.42 | 0.90 | 0.10 | 0.57 | 0.07 | 2.30 | 5.80 |  | 10.00 | 4.60 | 0.80 | -10.27 |
|  | 430.00 | 78.00 | 16.00 | 44.00 | 22.50 |  |  |  | 128.00 | 15.00 | 31.00 | 4.80 | 16.00 | 2.90 | 0.12 | 2.70 | 0.63 | 3.30 | 0.42 | 0.90 | 0.11 | 0.65 | 0.09 | 2.20 | 4.70 |  | 8.00 | 4.20 | 0.81 | -10.29 |
|  | 431.00 | 87.00 | 15.00 | 40.00 | 24.30 |  |  |  | 120.00 | 16.00 | 32.00 | 3.80 | 17.00 | 2.40 | 0.12 | 2.60 | 0.59 | 3.30 | 0.43 | 0.90 | 0.11 | 0.64 | 0.09 | 2.20 | 5.00 |  | 8.00 | 4.20 |  |  |
|  | 171.00 | 230.00 | 17.10 | 106.00 | 6.57 | 3.18 | 2.41 | 4.53 | 871.00 | 24.70 | 46.10 | 5.15 | 18.30 | 3.07 | 0.90 | 3.57 | 0.47 | 2.69 | 0.53 | 1.73 | 0.23 | 1.69 | 0.25 | 2.97 | 0.68 | 22.90 | 17.80 | 4.09 |  |  |
|  | 148.00 | 277.00 | 17.50 | 122.00 | 6.89 | 12.10 | 2.22 | 4.38 | 711.00 | 25.30 | 47.30 | 5.30 | 18.70 | 3.16 | 0.85 | 3.56 | 0.47 | 2.64 | 0.55 | 1.78 | 0.25 | 1.74 | 0.27 | 3.53 | 0.70 | 22.80 | 16.40 | 3.84 |  |  |
|  | 170.00 | 137.00 | 16.20 | 129.00 | 6.96 | 1.27 | 1.39 | 4.91 | 753.00 | 25.60 | 47.00 | 5.25 | 18.20 | 3.08 | 0.89 | 3.28 | 0.45 | 2.50 | 0.50 | 1.65 | 0.23 | 1.63 | 0.26 | 3.64 | 0.72 | 10.50 | 18.00 | 4.08 |  |  |
|  | 161.00 | 203.00 | 15.00 | 118.00 | 6.77 | 1.25 | 2.43 | 4.78 | 627.00 | 30.00 | 55.30 | 6.11 | 20.90 | 3.32 | 0.78 | 3.75 | 0.46 | 2.45 | 0.50 | 1.59 | 0.21 | 1.53 | 0.24 | 3.44 | 0.68 | 14.40 | 18.50 | 3.64 |  |  |
|  | 100.00 | 302.00 | 17.20 | 123.00 | 6.72 | <0.05 | 2.23 | 3.97 | 677.00 | 24.90 | 46.00 | 5.18 | 18.20 | 3.14 | 0.82 | 3.61 | 0.45 | 2.61 | 0.54 | 1.77 | 0.24 | 1.68 | 0.26 | 3.56 | 0.73 | 13.60 | 17.60 | 4.01 |  |  |
|  | 136.00 | 264.00 | 16.30 | 112.00 | 6.56 | 7.58 | 1.84 | 4.33 | 668.00 | 25.10 | 46.40 | 5.13 | 18.00 | 3.00 | 0.86 | 3.35 | 0.45 | 2.42 | 0.51 | 1.65 | 0.22 | 1.63 | 0.24 | 3.16 | 0.66 | 40.60 | 16.90 | 3.68 |  |  |

**References**

Dang, Y., Chen, M.H., Fu, B., Mao, J.W., Fanning, C.M., Li, Z.Y., 2018. Petrogenesis of the Yupo W-bearing and Dali Mo-bearing granitoids in the Dayaoshan area, South China: Constraints of geochronology and geochemistry. Ore Geology Reviews 92, 643–655.

Feng, S.J., Zhao, K.D., Ling, H.F., Chen, P.R., Chen, W.F., Sun, T., Jiang, S.Y., Pu, W., 2014. Geochronology, elemental and Nd–Hf isotopic geochemistry of Devonian A-type granites in central Jiangxi, South China: Constraints on petrogenesis and post-collisional extension of the Wuyi–Yunkai orogeny. Lithos 206–207, 1–18.

Guan, Y.L., Yuan, C., Sun, M., Wilde, S., Long, X.P., Huang, X.L., Wang, Q., 2014. I-type granitoids in the eastern Yangtze Block: implications for the Early Paleozoic intracontinental orogeny in South China. Lithos 206–207, 34–51.

Huang, X.L., Yu, Y., Li, J., Tong, L.X., Chen, L.L., 2013. Geochronology and petrogenesis of the early Paleozoic I-type granite in the Taishan area, South China: Middle-lower crustal melting during orogenic collapse. Lithos 177, 268–284.

Kong, H., Wu, J.H., Li, H., Chen, S.F., Liu, B., Wang, G., 2021. Early Paleozoic tectonic evolution of the South China Block: Constraints from geochemistry and geochronology of granitoids in Hunan Province. Lithos 380–381, 105891.

Li, X.L., Yu, J.H., Jiang, D.S., Griffin, W.L., Jiang, W., Xu, H., 2021b. Linking ocean subduction with early Paleozoic intracontinental orogeny in South China: Insights from the Xiaying complex in eastern Guangxi Province. Lithos 398–399, 106258.

Liu, X., Wang, Q., Ma, L., Yang, J.H., Ma, Y.M., Huang, T.Y., 2021b. Early Paleozoic and Late Mesozoic crustal reworking of the South China Block: Insights from Early Silurian biotite granodiorites and Late Jurassic biotite granites in the Guangzhou area of the south-east Wuyi-Yunkai orogeny. Journal of Asian Earth Sciences 219, 104890.

Tang, Y.L., Shi, Y., Hu, X.M., Liu, X.J., Huang, C.W., 2021. Petrogenesis of Early Paleozoic I-type granitoids in the Wuyi-Yunkai Orogen, South China: implications for the tectono-magmatic evolution of the Cathaysia Block. Journal of Asian Earth Sciences 220: 104906.

Xia, Y., Xu, X.S., Zou, H.B., Liu, L., 2014. Early Paleozoic crust–mantle interaction and lithosphere delamination in South China Block: Evidence from geochronology, geochemistry, and Sr–Nd–Hf isotopes of granites. Lithos 184–187, 416–435.

Xie, Y.X., Ma, L.Y., Zhao, G.C., Xie, C.F., Han, Y.G., Li, J.H., Liu, Q., Yao, J.L., Zhang, Y.Y., Lu, Y.F., 2020. Origin of the Heping granodiorite pluton: Implications for syn-convergent extension and asthenosphere upwelling accompanying the early Paleozoic orogeny in South China. Gondwana Research 85, 149–168.

Xu, W.J., Xu, S.H., 2015. Early Paleozoic intracontinental felsic magmatism in the South China Block: Petrogenesis and geodynamics. Lithos 234–235, 79–92.

Xu, W.J., Xu, S.H., 2017. An early Paleozoic monzonorite–granite suite in the South China block: Implications for the intracontinental felsic magmatism. Mineralogy and Petrology 111, 709–728.

Yu, P.P., Zhang, Y.Z., Zhou, Y.Z., Weinberg, R.F., Zheng, Y., Yang, W.B., 2019. Melt evolution of crustal anatexis recorded by the Early Paleozoic Baiyunshan migmatite-granite suite in South China. Lithos 332–333, 83–98.

Yu, Y., Huang, X.L., He, P.L., Li, J., 2016. I-type granitoids associated with the early Paleozoic intracontinental orogenic collapse along pre-existing block boundary in South China. Lithos 248–251, 353–365.

Yu, Y., Huang, X.L., Sun, M., He, P.L., 2018. Petrogenesis of granitoids and associated xenoliths in the early Paleozoic Baoxu and Enping plutons, South China: Implications for the evolution of the Wuyi-Yunkai intracontinental orogen. Journal of Asian Earth Sciences 156, 59–74.

Zhang, Q., Jiang, Y.H., Wang, G.C., Liu, Z., Ni, C.Y., Qing, L., 2015. Origin of Silurian gabbros and I-type granites in central Fujian, SE China: implications for the evolution of the early Paleozoic orogen of South China. Lithos 216–217, 285–297.

Zhong, Y.F., Wang, L.X., Zhao, J.H., Liu, L., Ma, C.Q., Zheng, J.P., Zhang, Z.J., Luo, B.J., 2016. Partial melting of an ancient sub-continental lithospheric mantle in the early Paleozoic intracontinental regime and its contribution to petrogenesis of the coeval peraluminous granites in South China. Lithos 264, 224–238.
